# Supplementary material for: Large-scale genome-wide association analyses identify novel genetic loci and mechanisms in hypertrophic cardiomyopathy
Source: Nat Genet. 2025 Feb 18;57(3):530–8. doi: 10.1038/s41588-025-02087-4 (PMC11906354; doi:10.1038/s41588-025-02087-4)
Supplement: Supplementary file 4 — Supplementary Tables 1–21. [file 41588_2025_2087_MOESM4_ESM.xlsx]

## Sheet: List
Supplementary Tables
Tadros et al. Large scale genome-wide association analyses identify novel genetic loci and mechanisms in hypertrophic cardiomyopathy
Supplementary Table 1	Study cohorts description
Supplementary Table 2	Genome wide significant loci in the stratified HCM GWAS analyses
Supplementary Table 3	Variants reaching false discovery rate <1% in multi-SNP-based conditional & joint association analysis (COJO)
Supplementary Table 4	Common variant heritability in hypertrophic cardiomyopathy (HCM)
Supplementary Table 5	UK Biobank cardiac magnetic resonance cohort - clinical and imaging characteristics
Supplementary Table 6	UK Biobank cardiac magnetic resonance cohort - genome-wide significant loci and HCM lookups
Supplementary Table 7	Cross-trait genetic correlation results of left ventricular traits and HCM
Supplementary Table 8	Genome-wide significant loci in the HCM MTAG
Supplementary Table 9	MAGMA gene set enrichment analyses
Supplementary Table 10	MAGMA tissue specificity analyses
Supplementary Table 11	Variant effect predictor (VEP) annotation for lead GWAS and MTAG variants
Supplementary Table 12	HCM MTAG lead variant to gene (V2G) mapping using OpenTargets
Supplementary Table 13	HCM MTAG locus to gene mapping using FUMA
Supplementary Table 14	TWAS in cardiac tissue (left ventricle, atrial appendage) using S-MultiXcan (GTEx V8)
Supplementary Table 15	Association of HCM GWAS and MTAG loci with other traits/diseases
Supplementary Table 16A	Rare loss of function variant burden testing in GEL, BRRD and UKB for the 26 prioritized genes
Supplementary Table 16B	Leave-one-out analysis for association of LoF SVIL variants with HCM
Supplementary Table 16C	Rare synonymous variant burden testing in GEL, BRRD and UKB for the 26 prioritized genes
Supplementary Table 17	Exome-wide gene-based burden testing for loss of function variants with minor allele frequency (MAF) <0.0001
Supplementary Table 18	Exome-wide gene-based burden testing for loss of function variants with minor allele frequency (MAF) <0.001
Supplementary Table 19	SVIL loss of function variants identified in hypertrophic cardiomyopathy cases (N=2,502) and controls (N=486,217)
Supplementary Table 20	Loci with same causal variant in hypertrophic and dilated cardiomyopathies using GWAS-PW
Supplementary Table 21	Mendelian randomization (MR) and sensitivity analyses

## Sheet: ST1
Supplementary Table 1: Study cohorts description
Back to list
Stratum	HCMR	Canada (CAN)	Netherlands (NL)	Genomics England (GEL)	Royal Brompton Hospital (RBH)	Italy (IT)	BRRD	Combined
Cases
N passing QC	2431	1035	999	471	448	277	239	5900
Male sex (%)	1,738 (72)	714 (69)	655 (66)	307 (65)	302 (67)	185 (67)	192 (80.3)	4,093 (69)
Age in years (mean ± SD)	50 ± 11	57 ± 15	51 ± 16	55 ± 16	67 ± 15	58 ± 17	58 ± 11
Ancestry (%)
AFR	221 (9.1)	-	-	25 (5.3)	-	-	6 (2.5)	252 (4.3)
AMR	122 (5.0)	-	-	1 (0.2)	-	-	-	123 (2.1)
EAS	66 (2.7)	-	-	2 (0.4)	-	-	4 (1.7)	72 (1.2)
EUR	1,897 (78.0)	1,035 (100)	999 (100)	364 (77.3)	448 (100)	277 (100)	202 (84.5)	5,222 (88.5)
FIN	-	-	-	-	-	-	-	-
SAS	125 (5.1)	-	-	58 (12.3)	-	-	6 (2.5)	189 (3.2)
Other	-	-	-	21 (4.5)	-	-	21 (9.7)	42 (0.7)
Cardiac imaging data available N (%)*	2,358 (97)	884 (85)	813 (81)	NA	421 (94)	154 (56)	NA
maxLVWT [Q1-Q3] (mm)	19 [17-23]	19 [16-22]	20 [17-22]	NA	19 [16-21]	18 [15-21]	NA
Sarcomere status available N (%)	2,396 (99)	843 (81)	974 (97)	471 (100)	448 (100)	294 (100)***	239 (100)
Sarcomere + N (% of available)	850 (35)	261 (31)	436 (45)	29 (6)	118 (26)	111 (34)***	0	1,776 (excluding GEL)
Sarcomere - N (% of available)	1,546 (65)	582 (69)	538 (55)	442 (94)	330 (74)	183 (56) ***	239 (100)	3860
HCM physiology available N (%)	2,526 (100)**	929 (90)	NA	NA	NA	NA	NA
Obstructive N (% of available)	462 (18)**	502 (54)	NA	NA	NA	NA	NA	964
Non-obstructive N (% of available)	2,064 (82)**	427 (46)	NA	NA	NA	NA	NA	2491
Genotyping platform	Axiom Precision Medicine Research Array	Illumina GSA	Illumina OmniExpress and GSA	WGS	Illumina OmniExpress	Illumina OmniExpress	WGS
Controls
N passing QC	40283	13889	2117	2355	1219	1293	7203	68359
Male sex (%)	28,785 (71)	8,290 (60)	1,196 (56)	1,535 (65)	558 (46)	858 (66)	2,219 (31)	43,441 (64)
Age in years (mean ± SD)	54 ± 7	63 ± 11	63 ± 11	43 ± 16	40 ± 13	53 ± 10	41 ± 21
Ancestry (%)
AFR	1,148 (2.85)	-	-	32 (1.4)	-	-	183 (2.54)	1,363 (2.0)
AMR	170 (0.42)	-	-	5 (0.2)	-	-	-	175 (0.3)
EAS	267 (0.66)	-	-	13 (5.5)	-	-	66 (0.92)	346 (0.5)
EUR	37,203 (92.4)	13,889 (100)	2,117 (100)	2,027 (86.1)	1,219 (100)	1,293 (100)	5,394 (74.9)	63,142 (92.4)
FIN	288 (0.72)	-	-	-	-	-	17 (0.24)	305 (0.4)
SAS	1,207 (3.0)	-	-	176 (7.5)	-	-	520 (7.22)	1,903 (2.8)
Other	-	-	-	102 (4.3)	-	-	1,023 (14.2)	1,125 (1.6)
Genotyping Platform	Axiom UK Biobank array	Illumina GSA	Illumina OmniExpress	WGS	Illumina OmniExpress	Illumina Human1M-Duo v3.0	WGS
Imputation and lGC
Imputation method	Minimac3	Minimac4	Minimac3	NA	Impute2	Minimac3	NA
Imputation reference panel	HRCr1.1	HRCr1.1	HRCr1.1	NA	UK10K+1KG	HRCr1.1	NA
N SNPs passing QC after imputation	6637942	7616022	7504364	10265854	8178240	6905554	9336490	9492702
Genomic inflation factor (lGC)	1.05	1.03	1.04	1.01	1.04	1.02	0.99
* Prior to septal reduction therapy or cardiac transplantation, if performed ** Numbers higher than the N cases passing QC in the HCMR stratum since the N cases included in the all-comer HCM case-control analysis (2,431) excluded overlapping samples from other cohorts (NL and RBH) *** Number of Italian HCM cases included in the sarcomere status stratified analyses is higher than the number of cas…
Abbreviations: 1KG, 1000 genomes project; BRRD, Bioresource Rare Disease; GSA, global screening array; HCMR, hypertrophic cardiomyopathy registry; HRC, haplotype reference consortium; maxLVWT, maximal left ventricular wall thickness; N, Number; Q1, first quartile; Q3, third quartile; QC, quality control; SD, standard deviation; SNP, single nucleotide polymorphism; WGS, whole genome sequencing.

## Sheet: ST2
Supplementary Table 2: Genome wide significant loci in the stratified HCM GWAS analyses
Back to list
Analysis	Lead SNP	GRCh37	EA	NEA	EAF	b	SE	P	Locus name
HCMSARC+	rs7843147	8:21839668	A	G	0.131	0.303	0.055	3.94e-08	XPO7
HCMSARC+	rs17099139	10:121419487	G	C	0.275	0.259	0.042	6.28e-10	BAG3
HCMSARC+	rs79098768	11: 46197992	A	G	0.053	0.819	0.072	1.53e-29	MYBPC3
HCMSARC+	rs112787369	14:68252852	T	A	0.044	0.506	0.09	2.14e-08	ZFYVE26
HCMSARC+	rs10438428	15:85330745	T	C	0.464	0.234	0.038	8.31e-10	ALPK3/NMB
HCMSARC+	rs658167	18:34263060	C	G	0.355	0.221	0.039	1.91e-08	FHOD3/TPGS2
HCMSARC-	rs846111	1:6279370	G	C	0.735	0.216	0.033	1.04e-10	RNF207
HCMSARC-	rs1763606	1:16338282	A	G	0.327	0.294	0.028	4.64e-26	HSPB7
HCMSARC-	rs7588378	2:37141495	T	C	0.486	0.176	0.027	7.65e-11	STRN
HCMSARC-	rs79146658	2:179786068	C	T	0.083	0.31	0.047	2.58e-11	CCDC141/SESTD1
HCMSARC-	rs4685090	3:14280870	G	T	0.78	0.263	0.034	2.54e-14	LSM3/SLC6A6
HCMSARC-	rs9311485	3:52987645	T	G	0.25	0.188	0.03	5.1e-10	ITIH3/SFMBT1
HCMSARC-	rs9647379	3:171785168	C	G	0.408	0.181	0.029	4.35e-10	PLD1/FNDC3B
HCMSARC-	rs991727	5:56995038	C	A	0.799	0.237	0.036	3.19e-11	ACTBL2
HCMSARC-	rs3176326	6:36647289	A	G	0.215	0.301	0.033	2.6e-20	CDKN1A
HCMSARC-	rs12212795	6:118654308	C	G	0.055	0.478	0.054	6.43e-19	PLN/SLC35F1
HCMSARC-	rs9320939	6:123818871	A	G	0.486	0.152	0.027	1.39e-08	TRDN/HEY2
HCMSARC-	rs2177843	10:75409877	T	C	0.162	0.304	0.037	1.47e-16	SYNPO2L/MYOZ1
HCMSARC-	rs11196085	10:114505037	C	T	0.278	0.205	0.03	5.96e-12	TCF7L2/VTI1A
HCMSARC-	rs2234962	10:121429633	C	T	0.212	0.403	0.031	1.67e-38	BAG3
HCMSARC-	rs58747679	12:26348304	T	C	0.714	0.169	0.031	3.33e-08	SSPN
HCMSARC-	rs77963625	12:46446897	C	T	0.031	0.442	0.078	1.19e-08	SCAF11
HCMSARC-	rs7301677	12:115381147	C	T	0.74	0.226	0.032	1.15e-12	TBX3
HCMSARC-	rs41306688	13:114078558	C	A	0.033	0.534	0.074	4.65e-13	ADPRHL1
HCMSARC-	rs8006225	14:95219657	G	T	0.826	0.213	0.038	1.57e-08	GSC
HCMSARC-	rs8033459	15:85253258	T	C	0.463	0.181	0.027	1.81e-11	ALPK3/NMB
HCMSARC-	rs393838	17:43705756	C	G	0.235	0.277	0.031	6.05e-19	CRHR1/MAPT
HCMSARC-	rs7210446	17:64307014	A	G	0.576	0.252	0.028	4.31e-19	PRKCA
HCMSARC-	rs2644262	18:34223566	C	T	0.29	0.382	0.029	1.58e-38	FHOD3/TPGS2
HCMSARC-	rs2070458	22:24159307	A	T	0.224	0.323	0.032	6.26e-24	VPREB3/SMARCB1
oHCM	rs1763606	1:16338282	A	G	0.3209	0.4112	0.0531	9.914e-15	HSPB7
oHCM	rs4151702	6:36645988	C	G	0.2091	0.3958	0.0601	4.373e-11	CDKN1A
oHCM	rs456384	6:118536165	A	G	0.0832	0.4863	0.0885	3.947e-08	PLN/SLC35F1
oHCM	rs17617337	10:121426884	T	C	0.21	0.4817	0.0598	8.103e-16	BAG3
oHCM	rs2267038	22:24169196	G	C	0.2146	0.3492	0.0609	1.008e-08	VPREB3/SMARCB1
nHCM	rs10803407	1:16358932	T	C	0.3318	0.2399	0.0364	4.294e-11	HSPB7
nHCM	rs2245109	2:37086197	G	C	0.4941	0.2158	0.0352	8.302e-10	STRN
nHCM	rs62177303	2:179768624	C	T	0.6113	0.2131	0.0377	1.549e-08	CCDC141/SESTD1
nHCM	rs13061705	3:14291129	C	T	0.6906	0.2579	0.0421	8.756e-10	LSM3/SLC6A6
nHCM	rs56224968	4:185794844	C	A	0.11	0.3154	0.0539	4.814e-09	ACSL1
nHCM	rs6457931	6:36613812	G	T	0.4372	0.2643	0.0354	8.731e-14	CDKN1A
nHCM	rs12212795	6:118654308	C	G	0.0537	0.3936	0.0679	6.693e-09	PLN/SLC35F1
nHCM	rs72842207	10:121433675	T	C	0.2099	0.3551	0.0399	5.542e-19	BAG3
nHCM	rs117879887	11:56739747	A	G	0.0123	0.8408	0.1445	5.989e-09	MYBPC3
nHCM	rs8033459	15:85253258	T	C	0.4644	0.2012	0.0346	5.78e-09	ALPK3/NMB
nHCM	rs393838	17:43705756	C	G	0.232	0.2579	0.0395	6.969e-11	CRHR1/MAPT
nHCM	rs2644262	18:34223566	C	T	0.2868	0.3509	0.038	2.609e-20	FHOD3/TPGS2
nHCM	rs5760032	22:24145727	C	T	0.2211	0.2829	0.0409	4.441e-12	VPREB3/SMARCB1
Abbreviations: b, regression coefficient; EA, effect allele; EAF, effect allele frequency; HCMSARC-, sarcomere negative HCM stratified GWAS; HCMSARC+, sarcomere positive HCM stratified GWAS; NEA, non-effect (other) allele; nHCM, non-obstructive HCM; oHCM, obstructive HCM; SE, standard error.
Reported statistical results are from a fixed-effects meta-analysis combining up to 7 case-control GWAS. P values are not corrected for multiple testing.

## Sheet: ST3
Supplementary Table 3: Variants reaching false discovery rate <1% in multi-SNP-based conditional & joint association analysis (COJO)
Back to list
Analysis	SNP*	Chr	bp	refA	freq	b	se	p	n	freq_geno	bJ	bJ_se	pJ
All-comer	chr1:2144107_A_G	1	2144107	A	0.129135	-0.21112	0.043331	1.1e-06	41924	0.114619	-0.21199	0.043343	1e-06
All-comer	chr1:6279370_C_G	1	6279370	G	0.734261	0.133498	0.026781	6.2e-07	63265.5	0.727571	0.134027	0.026786	5.63e-07
All-comer	chr1:16340879_T_G	1	16340879	T	0.325715	0.253339	0.02233	7.83e-30	80750.4	0.324003	0.253339	0.022348	8.68e-30
All-comer	chr1:78531345_A_T	1	78531345	A	0.388668	-0.10755	0.022476	1.71e-06	73767.8	0.385989	-0.10707	0.02248	1.91e-06
All-comer	chr1:84706819_C_T	1	84706819	C	0.292183	0.117235	0.024138	1.19e-06	73481.5	0.271958	0.115613	0.024143	1.68e-06
All-comer	chr1:89323727_C_T	1	89323727	C	0.460813	0.103806	0.021736	1.79e-06	75429.5	0.455587	0.102797	0.02174	2.26e-06
All-comer	chr1:162033890_T_C	1	162033890	C	0.741836	-0.10891	0.024038	5.88e-06	80017.3	0.753588	-0.10891	0.024041	5.9e-06
All-comer	chr1:214274759_C_T	1	214274759	T	0.932645	-0.21989	0.042685	2.59e-07	77358.8	0.935887	-0.22525	0.042707	1.33e-07
All-comer	chr1:214480192_A_G	1	214480192	G	0.985155	-0.43138	0.093744	4.19e-06	68895.5	0.984621	-0.44449	0.093791	2.15e-06
All-comer	chr1:236801085_T_C	1	236801085	T	0.203075	0.137714	0.026677	2.44e-07	76877.1	0.182811	0.137714	0.026681	2.45e-07
All-comer	chr2:11584197_A_C	2	11584197	C	0.651349	0.135328	0.023416	7.5e-09	71098.7	0.649354	0.135328	0.023421	7.56e-09
All-comer	chr2:27969645_G_T	2	27969645	T	0.984107	-0.41546	0.091395	5.47e-06	67775.2	0.984784	-0.41789	0.091409	4.84e-06
All-comer	chr2:37059557_C_G	2	37059557	C	0.500723	0.165411	0.022953	5.74e-13	67195.9	0.480715	0.165797	0.022962	5.18e-13
All-comer	chr2:57672889_G_A	2	57672889	G	0.214983	0.262216	0.056025	2.86e-06	16699.4	0.195406	0.262985	0.05606	2.72e-06
All-comer	chr2:65279414_G_A	2	65279414	A	0.613922	0.111321	0.021913	3.77e-07	77796.4	0.623754	0.111598	0.021917	3.54e-07
All-comer	chr2:103426177_T_C	2	103426177	C	0.937028	0.277734	0.049673	2.25e-08	60804.1	0.93281	0.277734	0.049685	2.27e-08
All-comer	chr2:128226841_G_A	2	128226841	G	0.24455	-0.11514	0.02563	7.04e-06	72963.4	0.238326	-0.11514	0.025633	7.06e-06
All-comer	chr2:179770998_G_A	2	179770998	A	0.916704	-0.20764	0.037917	4.35e-08	80651.5	0.914495	-0.24344	0.038243	1.95e-10
All-comer	chr2:179774634_G_T	2	179774634	T	0.859981	-0.19563	0.030097	8.04e-11	81160.9	0.855859	-0.22053	0.030358	3.75e-13
All-comer	chr2:218682474_G_A	2	218682474	A	0.591173	-0.10236	0.0227	6.51e-06	71099.4	0.592538	-0.10271	0.022703	6.06e-06
All-comer	chr2:220406239_T_G	2	220406239	T	0.460824	0.126119	0.022747	2.95e-08	68863.4	0.47668	0.126463	0.022752	2.72e-08
All-comer	chr2:223884049_AT_A	2	223884049	I	0.165737	0.27689	0.061897	7.7e-06	16700.7	0.15106	0.278297	0.061933	7e-06
All-comer	chr3:10620230_C_CA	3	10620230	D	0.47813	-0.21831	0.04733	3.98e-06	15825.3	0.465016	-0.2181	0.04736	4.12e-06
All-comer	chr3:14291129_T_C	3	14291129	C	0.688545	0.177645	0.024626	5.44e-13	68053.3	0.675763	0.177576	0.024635	5.67e-13
All-comer	chr3:52315192_G_A	3	52315192	A	0.816093	0.153602	0.028337	5.94e-08	73464.3	0.815729	0.156802	0.028348	3.18e-08
All-comer	chr3:53858164_C_T	3	53858164	C	0.469113	-0.08534	0.021984	0.000104	73572.2	0.45985	-0.10042	0.022112	5.59e-06
All-comer	chr3:53981291_T_C	3	53981291	C	0.968153	-0.32795	0.06537	5.25e-07	67199.2	0.970797	-0.36086	0.065746	4.05e-08
All-comer	chr3:73455851_C_T	3	73455851	C	0.434948	0.102085	0.022027	3.58e-06	74256.4	0.436644	0.102085	0.02203	3.59e-06
All-comer	chr3:100114519_CAT_C	3	100114519	I	0.064486	-0.45122	0.100173	6.66e-06	14611.7	0.055717	-0.45122	0.100239	6.75e-06
All-comer	chr3:169561428_C_A	3	169561428	A	0.966643	-0.30525	0.059964	3.57e-07	76368.4	0.9615	-0.30634	0.059974	3.26e-07
All-comer	chr3:171800256_G_A	3	171800256	A	0.594418	-0.1714	0.023344	2.1e-13	67364	0.594076	-0.17169	0.023353	1.95e-13
All-comer	chr4:7018506_C_G	4	7018506	C	0.042805	0.317224	0.069718	5.36e-06	44454.2	0.043552	0.317224	0.069733	5.39e-06
All-comer	chr4:154552003_T_C	4	154552003	T	0.026009	0.453282	0.097749	3.53e-06	36571.5	0.027829	0.4522	0.097777	3.75e-06
All-comer	chr4:159793642_T_C	4	159793642	C	0.982583	-0.43055	0.094166	4.83e-06	58346	0.981129	-0.42949	0.094182	5.11e-06
All-comer	chr5:36625434_C_T	5	36625434	C	0.414256	-0.11198	0.021863	3.03e-07	76339.7	0.415231	-0.10673	0.021892	1.09e-06
All-comer	chr5:36630209_A_G	5	36630209	G	0.965482	-0.28053	0.054174	2.24e-07	90530.4	0.969049	-0.26769	0.054246	8.02e-07
All-comer	chr5:56771353_C_T	5	56771353	C	0.024977	0.757125	0.150115	4.57e-07	16114.9	0.018572	0.772232	0.150242	2.75e-07
All-comer	chr5:57011469_A_T	5	57011469	A	0.204756	-0.21374	0.028604	7.88e-14	66426.4	0.206702	-0.2157	0.028618	4.8e-14
All-comer	chr5:113592769_CATATAACTATTTA_C	5	113592769	D	0.804597	-0.26288	0.05838	6.7e-06	16509.9	0.799517	-0.26288	0.058414	6.79e-06
All-comer	chr5:138668504_T_C	5	138668504	T	0.272775	0.170153	0.025743	3.85e-11	67332.2	0.249749	0.170153	0.025751	3.91e-11
All-comer	chr6:16281187_T_C	6	16281187	C	0.730263	0.132483	0.024289	4.91e-08	76188.1	0.735883	0.132801	0.024294	4.59e-08
All-comer	chr6:21390219_C_T	6	21390219	T	0.731582	-0.11178	0.024775	6.43e-06	73463.8	0.725068	-0.11217	0.024778	5.98e-06
All-comer	chr6:33774394_A_C	6	33774394	C	0.77135	0.128077	0.025841	7.18e-07	75181.8	0.766794	0.125679	0.025846	1.16e-06
All-comer	chr6:36647289_A_G	6	36647289	G	0.788132	-0.26688	0.026266	2.97e-24	76782.1	0.804375	-0.26571	0.026285	5.04e-24
All-comer	chr6:54019101_C_A	6	54019101	A	0.63665	0.12405	0.023975	2.29e-07	66585.4	0.640436	0.12405	0.02398	2.3e-07
All-comer	chr6:118654308_C_G	6	118654308	G	0.945521	-0.41865	0.043339	4.46e-22	91452.1	0.946361	-0.47281	0.044049	7.07e-27
All-comer	chr6:118722495_C_T	6	118722495	C	0.477581	0.104398	0.021431	1.11e-06	77270.1	0.463508	0.14617	0.021774	1.91e-11
All-comer	chr6:123818871_A_G	6	123818871	G	0.514401	-0.12363	0.021584	1.02e-08	76079	0.505862	-0.12642	0.02159	4.75e-09
All-comer	chr6:149967083_C_T	6	149967083	T	0.629609	-0.10645	0.022328	1.87e-06	76161.4	0.643277	-0.10645	0.022331	1.87e-06
All-comer	chr7:28716565_G_A	7	28716565	A	0.97696	-0.32067	0.071662	7.65e-06	76602.9	0.981254	-0.32067	0.071671	7.67e-06
All-comer	chr7:128438284_T_C	7	128438284	C	0.837714	-0.19547	0.029834	5.68e-11	73154.5	0.853622	-0.19547	0.029843	5.75e-11
All-comer	chr7:140942011_C_CCAAA	7	140942011	D	0.381392	-0.22298	0.049232	5.92e-06	15468.9	0.34907	-0.22298	0.049263	6e-06
All-comer	chr8:1236347_G_A	8	1236347	G	0.139847	-0.15055	0.03335	6.36e-06	66182.4	0.144927	-0.15046	0.033355	6.46e-06
All-comer	chr8:8168394_G_A	8	8168394	G	0.47942	-0.10109	0.021829	3.64e-06	74455.9	0.479183	-0.10103	0.021832	3.7e-06
All-comer	chr8:21802432_A_G	8	21802432	G	0.861662	-0.19933	0.031445	2.31e-10	75107.2	0.885746	-0.19933	0.031453	2.34e-10
All-comer	chr8:33181258_A_G	8	33181258	G	0.955883	-0.24921	0.052197	1.8e-06	77066.4	0.961936	-0.24921	0.052204	1.81e-06
All-comer	chr8:60793296_A_C	8	60793296	C	0.957657	-0.28626	0.063167	5.85e-06	54722.1	0.952498	-0.28626	0.063178	5.87e-06
All-comer	chr8:124546313_C_G	8	124546313	G	0.52	-0.11091	0.022037	4.83e-07	73045.9	0.506157	-0.10972	0.022041	6.42e-07
All-comer	chr8:125861374_T_C	8	125861374	C	0.689923	-0.15178	0.023343	7.93e-11	75940	0.684993	-0.1511	0.02335	9.73e-11
All-comer	chr8:133508765_A_AT	8	133508765	D	0.25802	0.255952	0.053373	1.62e-06	16218.6	0.258932	0.256042	0.053409	1.64e-06
All-comer	chr9:74774936_T_C	9	74774936	C	0.978328	-0.39147	0.07728	4.07e-07	69922.8	0.981038	-0.39147	0.077294	4.09e-07
All-comer	chr9:98959408_G_A	9	98959408	G	0.400096	0.102269	0.022595	6.01e-06	72260.7	0.406474	0.102269	0.022598	6.02e-06
All-comer	chr9:111777384_A_C	9	111777384	C	0.868494	-0.14866	0.031133	1.8e-06	79986.6	0.870869	-0.14866	0.031137	1.8e-06
All-comer	chr9:134544226_T_C	9	134544226	C	0.722487	-0.12439	0.023833	1.8e-07	77745	0.714928	-0.12439	0.023837	1.81e-07
All-comer	chr10:4098453_A_G	10	4098453	A	0.189496	0.153164	0.027859	3.84e-08	74273.3	0.170527	0.152996	0.027865	4e-08
All-comer	chr10:12506827_G_A	10	12506827	G	0.320937	-0.22763	0.050374	6.22e-06	15996.3	0.342298	-0.22643	0.050405	7.05e-06
All-comer	chr10:18956340_C_T	10	18956340	C	0.220634	-0.13175	0.026723	8.21e-07	72105	0.220703	-0.13135	0.026728	8.9e-07
All-comer	chr10:29701215_C_G	10	29701215	G	0.766184	0.119499	0.026008	4.33e-06	73071.7	0.772666	0.119499	0.026012	4.35e-06
All-comer	chr10:50904588_A_G	10	50904588	G	0.969873	0.324834	0.072048	6.53e-06	58375.6	0.96839	0.324834	0.07206	6.55e-06
All-comer	chr10:64038553_G_A	10	64038553	A	0.976749	-0.37627	0.079822	2.43e-06	61188.5	0.977904	-0.39185	0.079894	9.36e-07
All-comer	chr10:64686563_T_G	10	64686563	G	0.529686	-0.1069	0.021708	8.46e-07	75424.1	0.510335	-0.11097	0.021727	3.27e-07
All-comer	chr10:75409877_T_C	10	75409877	C	0.841321	-0.2355	0.029789	2.67e-15	74703.3	0.855668	-0.2355	0.029801	2.74e-15
All-comer	chr10:88460084_A_G	10	88460084	G	0.926399	-0.18757	0.0414	5.88e-06	75769.7	0.925093	-0.18757	0.041405	5.89e-06
All-comer	chr10:105287057_GT_G	10	105287057	I	0.401943	0.271965	0.058784	3.72e-06	10642.2	0.401524	0.272211	0.05884	3.72e-06
All-comer	chr10:114505037_C_T	10	114505037	T	0.722915	-0.2029	0.023844	1.75e-17	77702.1	0.740219	-0.20278	0.023855	1.89e-17
All-comer	chr10:121429633_C_T	10	121429633	T	0.789491	-0.37183	0.025106	1.25e-49	84332.3	0.783708	-0.37214	0.025139	1.39e-49
All-comer	chr10:126528768_C_T	10	126528768	T	0.969751	-0.263	0.060318	1.3e-05	82971.8	0.974418	-0.26862	0.060326	8.48e-06
All-comer	chr10:128597039_A_AATG	10	128597039	D	0.023641	0.843804	0.164605	2.96e-07	14136.8	0.020956	0.838284	0.164753	3.62e-07
All-comer	chr11:1794406_AG_A	11	1794406	I	0.085031	-0.53543	0.117284	4.99e-06	8256.32	0.083494	-0.53543	0.117425	5.12e-06
All-comer	chr11:14375079_C_T	11	14375079	T	0.638921	-0.13963	0.022615	6.65e-10	75029.6	0.648112	-0.13963	0.022621	6.72e-10
All-comer	chr12:3338920_G_GCACAGCTGGGGCTGA	12	3338920	D	0.220744	-0.35213	0.07678	4.51e-06	8714.2	0.207957	-0.35213	0.076868	4.63e-06
All-comer	chr12:20589183_G_A	12	20589183	A	0.624212	-0.11806	0.022999	2.85e-07	71358	0.621188	-0.11746	0.023003	3.29e-07
All-comer	chr12:26348429_G_C	12	26348429	C	0.749885	0.132932	0.025602	2.08e-07	72019.7	0.748233	0.13138	0.025608	2.89e-07
All-comer	chr12:32952911_G_C	12	32952911	C	0.859452	-0.13896	0.03024	4.33e-06	80162.5	0.872553	-0.13777	0.030245	5.23e-06
All-comer	chr12:45437674_A_ACT	12	45437674	D	0.020871	0.728668	0.163379	8.2e-06	16218.4	0.022382	0.735625	0.163479	6.8e-06
All-comer	chr12:46446897_C_T	12	46446897	T	0.969438	-0.32823	0.063996	2.91e-07	72967.9	0.968742	-0.32939	0.064009	2.66e-07
All-comer	chr12:53448320_T_C	12	53448320	C	0.700982	0.12174	0.026639	4.88e-06	59525.7	0.716016	0.121404	0.026644	5.2e-06
All-comer	chr12:82424744_C_G	12	82424744	G	0.989659	-0.54212	0.116551	3.3e-06	63689.7	0.989907	-0.54212	0.11657	3.31e-06
All-comer	chr12:115381147_T_C	12	115381147	C	0.739825	0.205486	0.025443	6.67e-16	71017.6	0.727468	0.205486	0.025455	6.88e-16
All-comer	chr13:107888304_A_T	13	107888304	T	0.76476	-0.12388	0.024995	7.2e-07	78780.3	0.762546	-0.12298	0.025	8.7e-07
All-comer	chr13:114055313_A_C	13	114055313	A	0.38746	-0.12122	0.022537	7.51e-08	73446.5	0.391121	-0.11967	0.022543	1.1e-07
All-comer	chr13:114078558_C_A	13	114078558	A	0.966722	-0.4709	0.059642	2.89e-15	77336.1	0.965913	-0.46465	0.059672	6.88e-15
All-comer	chr14:30312392_G_T	14	30312392	T	0.868108	-0.15228	0.032575	2.94e-06	72879.4	0.879781	-0.15228	0.03258	2.95e-06
All-comer	chr14:53316867_G_T	14	53316867	T	0.813149	-0.15198	0.02768	4e-08	76054.7	0.812005	-0.15198	0.027685	4.03e-08
All-comer	chr14:88974767_T_C	14	88974767	C	0.982594	-0.38032	0.078622	1.32e-06	83755.3	0.983818	-0.38294	0.078634	1.12e-06
All-comer	chr14:95219657_T_G	14	95219657	G	0.825246	0.202823	0.030406	2.55e-11	66386	0.818021	0.203379	0.030416	2.29e-11
All-comer	chr14:102949753_GT_G	14	102949753	D	0.637946	0.228116	0.049156	3.47e-06	15849.6	0.609656	0.227693	0.049188	3.67e-06
All-comer	chr15:49375325_C_T	15	49375325	T	0.68655	0.109329	0.024209	6.3e-06	70206.3	0.693441	0.109329	0.024212	6.32e-06
All-comer	chr15:79053014_A_G	15	79053014	A	0.262328	0.128988	0.02436	1.19e-07	77103.7	0.241387	0.128253	0.024364	1.41e-07
All-comer	chr15:85253258_T_C	15	85253258	C	0.538619	-0.18679	0.021669	6.68e-18	75831.8	0.543433	-0.18639	0.02168	8.14e-18
All-comer	chr16:2238931_A_G	16	2238931	G	0.926514	-0.20617	0.042322	1.11e-06	72604.7	0.929996	-0.2057	0.042329	1.18e-06
All-comer	chr16:4266062_G_A	16	4266062	G	0.494731	0.101843	0.021825	3.07e-06	74365	0.497164	0.101587	0.021828	3.26e-06
All-comer	chr16:56721262_T_A	16	56721262	A	0.903975	0.173781	0.03802	4.86e-06	70567.1	0.895142	0.173781	0.038025	4.87e-06
All-comer	chr16:88507269_A_G	16	88507269	G	0.711723	0.123188	0.026883	4.6e-06	59712.9	0.717684	0.123188	0.026888	4.61e-06
All-comer	chr17:4755502_C_G	17	4755502	G	0.985063	-0.41106	0.088251	3.2e-06	77269.3	0.988537	-0.41106	0.088263	3.2e-06
All-comer	chr17:27694018_T_C	17	27694018	T	0.472399	-0.11206	0.023647	2.15e-06	63529.7	0.484755	-0.11206	0.023651	2.16e-06
All-comer	chr17:43705756_C_G	17	43705756	G	0.766287	-0.23592	0.025058	4.73e-21	78675.5	0.775058	-0.23597	0.025072	4.88e-21
All-comer	chr17:53392852_A_G	17	53392852	G	0.617356	-0.11743	0.0226	2.03e-07	73381.8	0.626674	-0.11751	0.022604	2.01e-07
All-comer	chr17:63446119_A_T	17	63446119	A	0.04424	0.362205	0.075164	1.44e-06	37054.9	0.043	0.366167	0.075188	1.12e-06
All-comer	chr17:64308473_T_C	17	64308473	T	0.426154	-0.21421	0.022643	3.07e-21	70553	0.41948	-0.21483	0.022658	2.51e-21
All-comer	chr17:80640745_A_G	17	80640745	G	0.969275	0.308948	0.0653	2.23e-06	69725.5	0.973944	0.308948	0.06531	2.24e-06
All-comer	chr18:33905313_A_G	18	33905313	A	0.248798	-0.13488	0.026387	3.19e-07	68037.1	0.245305	-0.14232	0.026444	7.37e-08
All-comer	chr18:34223566_C_T	18	34223566	T	0.712224	-0.3286	0.023756	1.62e-43	76382	0.728626	-0.27706	0.024949	1.19e-28
All-comer	chr18:34280732_T_C	18	34280732	C	0.987671	-0.78593	0.090265	3.12e-18	89196.3	0.988603	-0.63813	0.091642	3.32e-12
All-comer	chr18:34289285_T_G	18	34289285	G	0.976179	-0.55699	0.070759	3.5e-15	76013.2	0.974419	-0.39522	0.073316	7.02e-08
All-comer	chr18:34315641_G_C	18	34315641	C	0.969176	-0.32016	0.068355	2.82e-06	63432.9	0.976449	-0.32944	0.068413	1.47e-06
All-comer	chr18:34552048_G_A	18	34552048	A	0.987248	-0.38927	0.103495	0.000169	65668.9	0.989105	-0.46748	0.103725	6.58e-06
All-comer	chr18:52226520_T_A	18	52226520	T	0.052391	0.297942	0.066151	6.67e-06	40749.8	0.045656	0.297415	0.066167	6.96e-06
All-comer	chr18:55922789_G_A	18	55922789	A	0.694697	-0.13209	0.0238	2.86e-08	73694.3	0.691001	-0.13194	0.023805	2.98e-08
All-comer	chr19:22357468_G_A	19	22357468	G	0.011825	0.975932	0.211655	4.01e-06	16899.6	0.013005	1.00239	0.211865	2.23e-06
All-comer	chr19:28766456_T_A	19	28766456	A	0.715999	-0.22155	0.051134	1.47e-05	16640.8	0.728409	-0.22833	0.051181	8.15e-06
All-comer	chr19:46292649_C_T	19	46292649	T	0.962198	-0.19358	0.062008	0.001797	63322.1	0.957279	-0.32086	0.064326	6.1e-07
All-comer	chr19:46312077_A_G	19	46312077	G	0.661919	0.149708	0.022861	5.81e-11	75689.1	0.657813	0.180933	0.023719	2.38e-14
All-comer	chr19:47219450_G_A	19	47219450	A	0.976026	-0.34964	0.077045	5.67e-06	63747.9	0.980257	-0.34417	0.077062	7.96e-06
All-comer	chr21:30530131_A_G	21	30530131	G	0.933902	0.278657	0.045808	1.18e-09	68342.2	0.945219	0.278657	0.04582	1.19e-09
All-comer	chr22:24159307_A_T	22	24159307	A	0.221646	0.268426	0.026002	5.53e-25	75829	0.191321	0.268006	0.02602	7.05e-25
All-comer	chr22:27110386_G_C	22	27110386	C	0.748339	0.123625	0.026604	3.37e-06	66427.4	0.752406	0.122665	0.026608	4.03e-06
All-comer	chr22:40726749_C_T	22	40726749	C	0.485587	-0.11286	0.023139	1.08e-06	66202.2	0.489823	-0.11286	0.023143	1.08e-06
Sarcomere negative	chr1:6279370_C_G	1	6279370	G	0.735211	0.216383	0.033467	1.01e-10	37019.9	0.727571	0.216383	0.033485	1.03e-10
Sarcomere negative	chr1:16338282_A_G	1	16338282	A	0.326805	0.294465	0.027871	4.32e-26	47174.5	0.324327	0.294465	0.027904	4.92e-26
Sarcomere negative	chr1:56196780_C_CA	1	56196780	D	0.108374	0.49646	0.11055	7.09e-06	6823.64	0.115217	0.49646	0.110705	7.31e-06
Sarcomere negative	chr1:113276156_A_G	1	113276156	A	0.486273	-0.12827	0.027335	2.7e-06	43271.1	0.489629	-0.12827	0.027342	2.72e-06
Sarcomere negative	chr1:162033890_T_C	1	162033890	C	0.740876	-0.13334	0.029809	7.71e-06	47351.9	0.753588	-0.13334	0.029815	7.75e-06
Sarcomere negative	chr1:214285221_T_C	1	214285221	C	0.954129	-0.29259	0.063817	4.54e-06	45315.8	0.95476	-0.29259	0.063831	4.57e-06
Sarcomere negative	chr1:236801085_T_C	1	236801085	T	0.206096	0.17366	0.032947	1.36e-07	45471	0.182811	0.17366	0.032957	1.37e-07
Sarcomere negative	chr2:11592294_T_G	2	11592294	G	0.650736	0.143385	0.029192	9.02e-07	41699.6	0.650319	0.143385	0.0292	9.09e-07
Sarcomere negative	chr2:37141495_T_C	2	37141495	C	0.514451	-0.17606	0.027034	7.39e-11	44223.7	0.533233	-0.17606	0.027047	7.54e-11
Sarcomere negative	chr2:55010193_A_G	2	55010193	G	0.516599	-0.12178	0.026611	4.73e-06	45675.8	0.533691	-0.12178	0.026617	4.76e-06
Sarcomere negative	chr2:65276452_C_T	2	65276452	T	0.613607	0.136335	0.027324	6.05e-07	45627.2	0.624214	0.136335	0.027331	6.09e-07
Sarcomere negative	chr2:103562025_A_G	2	103562025	G	0.930617	0.275704	0.057755	1.81e-06	37497.6	0.9258	0.275704	0.057772	1.82e-06
Sarcomere negative	chr2:173877524_A_G	2	173877524	A	0.390315	-0.13762	0.02858	1.47e-06	41551.1	0.382084	-0.13808	0.028588	1.36e-06
Sarcomere negative	chr2:174826378_C_T	2	174826378	T	0.77613	0.167227	0.035125	1.93e-06	37674.4	0.774316	0.165976	0.035136	2.31e-06
Sarcomere negative	chr2:179774634_G_T	2	179774634	T	0.860293	-0.17786	0.037629	2.28e-06	47462.9	0.855859	-0.21263	0.037948	2.1e-08
Sarcomere negative	chr2:179786068_C_T	2	179786068	T	0.916582	-0.31035	0.046501	2.49e-11	48833.4	0.91367	-0.34397	0.046905	2.25e-13
Sarcomere negative	chr2:201195602_T_C	2	201195602	C	0.58529	-0.12564	0.027136	3.65e-06	45191.4	0.581361	-0.12564	0.027142	3.67e-06
Sarcomere negative	chr2:220406239_T_G	2	220406239	T	0.45735	0.149335	0.028157	1.14e-07	41042.3	0.47668	0.149335	0.028166	1.15e-07
Sarcomere negative	chr3:14280870_T_G	3	14280870	G	0.780345	0.262731	0.034454	2.43e-14	39657.7	0.7845	0.262731	0.034479	2.54e-14
Sarcomere negative	chr3:52987645_T_G	3	52987645	T	0.250298	0.187618	0.030161	4.95e-10	47301.6	0.237092	0.181051	0.030208	2.05e-09
Sarcomere negative	chr3:53981291_T_C	3	53981291	C	0.967768	-0.37936	0.078488	1.34e-06	42030.4	0.970797	-0.3568	0.078599	5.64e-06
Sarcomere negative	chr3:69906267_C_T	3	69906267	T	0.812197	-0.17772	0.034505	2.6e-07	44471.6	0.807224	-0.17792	0.034515	2.54e-07
Sarcomere negative	chr3:74175219_GAAAA_G	3	74175219	D	0.681196	0.356321	0.079435	7.27e-06	5878	0.740068	0.35686	0.079564	7.29e-06
Sarcomere negative	chr3:134032364_A_G	3	134032364	G	0.883048	0.221401	0.046837	2.28e-06	35647.5	0.895028	0.221401	0.046851	2.29e-06
Sarcomere negative	chr3:158287801_C_T	3	158287801	T	0.848922	0.213759	0.041175	2.09e-07	37138.1	0.85847	0.213759	0.041189	2.11e-07
Sarcomere negative	chr3:171785168_C_G	3	171785168	G	0.592279	-0.18109	0.028995	4.22e-10	39765.7	0.59234	-0.18109	0.029009	4.3e-10
Sarcomere negative	chr3:186086283_T_C	3	186086283	C	0.555387	-0.13206	0.027123	1.12e-06	44461.5	0.581992	-0.13206	0.02713	1.13e-06
Sarcomere negative	chr4:14442433_T_C	4	14442433	C	0.95156	0.297878	0.066153	6.7e-06	40041.6	0.960945	0.297878	0.066169	6.74e-06
Sarcomere negative	chr4:95514609_A_C	4	95514609	A	0.463686	0.127499	0.027648	4e-06	42489.5	0.444935	0.12899	0.027656	3.1e-06
Sarcomere negative	chr4:103188709_T_C	4	103188709	C	0.929174	0.266172	0.056038	2.04e-06	39080.9	0.924111	0.269108	0.056057	1.58e-06
Sarcomere negative	chr4:141192507_T_C	4	141192507	C	0.957981	-0.32951	0.068603	1.56e-06	42633	0.957951	-0.32788	0.068622	1.77e-06
Sarcomere negative	chr4:141490458_A_G	4	141490458	G	0.930693	-0.22974	0.051049	6.79e-06	48053.8	0.933557	-0.22845	0.05106	7.67e-06
Sarcomere negative	chr4:166115008_ACT_A	4	166115008	I	0.263515	0.284239	0.057825	8.86e-07	12429.4	0.24915	0.283309	0.057879	9.84e-07
Sarcomere negative	chr4:168473540_C_T	4	168473540	C	0.200482	-0.17392	0.038337	5.72e-06	34282.4	0.175863	-0.17325	0.038348	6.25e-06
Sarcomere negative	chr4:185060535_A_T	4	185060535	T	0.963682	-0.3482	0.077652	7.32e-06	38272.1	0.965375	-0.3482	0.077671	7.36e-06
Sarcomere negative	chr5:36630209_A_G	5	36630209	G	0.964782	-0.2982	0.066468	7.24e-06	53812.9	0.969049	-0.2982	0.06648	7.27e-06
Sarcomere negative	chr5:56771353_C_T	5	56771353	C	0.025238	0.772601	0.166223	3.35e-06	11867.8	0.018572	0.790332	0.166388	2.03e-06
Sarcomere negative	chr5:56995038_A_C	5	56995038	A	0.201017	-0.23748	0.035751	3.08e-11	39322.1	0.207263	-0.24018	0.035775	1.9e-11
Sarcomere negative	chr5:98401188_G_A	5	98401188	A	0.937533	-0.25187	0.054405	3.66e-06	46596.6	0.945636	-0.25187	0.054417	3.68e-06
Sarcomere negative	chr5:113912098_G_A	5	113912098	A	0.670488	-0.13385	0.028379	2.4e-06	45394.1	0.674263	-0.13385	0.028386	2.41e-06
Sarcomere negative	chr5:138730037_C_T	5	138730037	T	0.711623	-0.15406	0.029755	2.25e-07	44450.5	0.732082	-0.15406	0.029764	2.27e-07
Sarcomere negative	chr6:1378993_A_G	6	1378993	G	0.63561	-0.18664	0.04048	4.01e-06	21272	0.637482	-0.18664	0.040499	4.06e-06
Sarcomere negative	chr6:16281187_T_C	6	16281187	C	0.728865	0.142885	0.030347	2.5e-06	44380.1	0.735883	0.142885	0.030354	2.51e-06
Sarcomere negative	chr6:26414417_T_A	6	26414417	T	0.032384	-0.393	0.086136	5.05e-06	34738.3	0.015408	-0.393	0.086161	5.09e-06
Sarcomere negative	chr6:36647289_A_G	6	36647289	G	0.785012	-0.30066	0.032536	2.45e-20	45147.1	0.804375	-0.30066	0.032566	2.65e-20
Sarcomere negative	chr6:54019101_C_A	6	54019101	A	0.637752	0.137275	0.029769	4e-06	39450.3	0.640436	0.137275	0.029777	4.02e-06
Sarcomere negative	chr6:84447452_A_G	6	84447452	G	0.866332	-0.17505	0.038656	5.94e-06	46680.2	0.872062	-0.17505	0.038664	5.97e-06
Sarcomere negative	chr6:118346074_T_TA	6	118346074	D	0.02076	1.42956	0.274092	1.83e-07	5264.95	0.01497	1.39715	0.27488	3.72e-07
Sarcomere negative	chr6:118654308_C_G	6	118654308	G	0.945119	-0.47806	0.053771	6.08e-19	53805.3	0.946361	-0.54792	0.054662	1.2e-23
Sarcomere negative	chr6:118706447_T_C	6	118706447	T	0.480395	0.138206	0.026726	2.33e-07	45297.4	0.463669	0.183596	0.027166	1.4e-11
Sarcomere negative	chr6:123818871_A_G	6	123818871	G	0.51381	-0.15225	0.026813	1.36e-08	44963.3	0.505862	-0.15587	0.026824	6.22e-09
Sarcomere negative	chr6:126045148_T_A	6	126045148	T	0.504846	-0.14696	0.028731	3.14e-07	39136.3	0.485367	-0.147	0.028741	3.14e-07
Sarcomere negative	chr6:144416878_T_A	6	144416878	A	0.924064	-0.2638	0.050084	1.39e-07	45883.7	0.920245	-0.2638	0.050099	1.4e-07
Sarcomere negative	chr7:30917784_A_G	7	30917784	A	0.184292	0.172357	0.038007	5.76e-06	37193.1	0.153906	0.172357	0.038017	5.8e-06
Sarcomere negative	chr7:83791313_C_CCTT	7	83791313	D	0.034835	0.886058	0.191533	3.73e-06	6531.31	0.036191	0.887022	0.191832	3.76e-06
Sarcomere negative	chr7:91148402_A_G	7	91148402	G	0.87083	-0.26774	0.058043	3.97e-06	21303.5	0.892383	-0.26803	0.058071	3.92e-06
Sarcomere negative	chr7:128432108_T_C	7	128432108	C	0.88175	-0.19523	0.040776	1.69e-06	46590.7	0.889653	-0.19523	0.040786	1.69e-06
Sarcomere negative	chr7:153721221_A_G	7	153721221	G	0.963248	-0.36665	0.080621	5.42e-06	35099.5	0.966149	-0.36665	0.080644	5.45e-06
Sarcomere negative	chr8:11491725_A_G	8	11491725	G	0.988967	-0.69602	0.142359	1.01e-06	36520.9	0.989734	-0.69602	0.142404	1.02e-06
Sarcomere negative	chr8:60803142_T_C	8	60803142	C	0.966279	-0.40128	0.083707	1.64e-06	35372.3	0.961391	-0.40128	0.083733	1.65e-06
Sarcomere negative	chr8:125861374_T_C	8	125861374	C	0.689163	-0.15229	0.028973	1.47e-07	44911.8	0.684993	-0.15229	0.028982	1.48e-07
Sarcomere negative	chr8:145154222_A_G	8	145154222	G	0.952875	-0.3223	0.067189	1.61e-06	39841.5	0.948362	-0.3223	0.067208	1.62e-06
Sarcomere negative	chr9:14513743_T_A	9	14513743	T	0.13876	0.177306	0.038528	4.18e-06	45532.9	0.127622	0.177306	0.038537	4.2e-06
Sarcomere negative	chr9:98942575_C_T	9	98942575	C	0.392852	0.142829	0.027786	2.74e-07	43856.3	0.393209	0.142829	0.027794	2.76e-07
Sarcomere negative	chr10:18956340_C_T	10	18956340	C	0.220207	-0.15592	0.033362	2.96e-06	42260.1	0.220703	-0.15592	0.03337	2.98e-06
Sarcomere negative	chr10:29701215_C_G	10	29701215	G	0.763309	0.158455	0.032108	8.01e-07	43362.8	0.772666	0.158455	0.032117	8.07e-07
Sarcomere negative	chr10:62064858_T_A	10	62064858	A	0.711857	-0.15002	0.029869	5.1e-07	44134.6	0.712742	-0.15001	0.029877	5.14e-07
Sarcomere negative	chr10:71836751_G_GCCTT	10	71836751	D	0.293642	0.36756	0.074963	9.43e-07	6909.98	0.288832	0.370399	0.075089	8.11e-07
Sarcomere negative	chr10:75409877_T_C	10	75409877	C	0.838385	-0.30367	0.036743	1.4e-16	44108.6	0.855668	-0.30552	0.036772	9.69e-17
Sarcomere negative	chr10:78547554_C_T	10	78547554	T	0.971073	-0.41416	0.092511	7.57e-06	33594.7	0.97508	-0.41784	0.092539	6.32e-06
Sarcomere negative	chr10:80098121_A_G	10	80098121	A	0.087827	0.362666	0.075491	1.55e-06	17677.5	0.090278	0.365331	0.075539	1.32e-06
Sarcomere negative	chr10:114505037_C_T	10	114505037	T	0.722323	-0.20467	0.029724	5.75e-12	45554.5	0.740219	-0.20448	0.029739	6.16e-12
Sarcomere negative	chr10:121429633_C_T	10	121429633	T	0.788032	-0.40338	0.031069	1.52e-38	49950.1	0.783708	-0.40327	0.031121	2.12e-38
Sarcomere negative	chr11:1793684_A_AGTGTGT	11	1793684	D	0.085023	-0.62031	0.133412	3.33e-06	5815.49	0.083557	-0.62031	0.133648	3.46e-06
Sarcomere negative	chr11:14380828_A_G	11	14380828	G	0.638821	-0.14423	0.028309	3.49e-07	43677.8	0.648166	-0.14423	0.028317	3.52e-07
Sarcomere negative	chr11:47111724_CG_C	11	47111724	I	0.013237	1.22733	0.269354	5.2e-06	8507.51	0.010184	1.22733	0.269667	5.33e-06
Sarcomere negative	chr11:68055024_C_A	11	68055024	A	0.729221	-0.14785	0.030691	1.45e-06	43425.1	0.713169	-0.14785	0.030699	1.46e-06
Sarcomere negative	chr11:132733434_C_CT	11	132733434	D	0.173775	0.423601	0.088593	1.74e-06	7149.06	0.187265	0.423601	0.088728	1.8e-06
Sarcomere negative	chr12:26348304_C_T	12	26348304	T	0.71357	0.168923	0.030563	3.26e-08	42297	0.70288	0.168923	0.030574	3.29e-08
Sarcomere negative	chr12:46446897_C_T	12	46446897	T	0.9687	-0.44229	0.077525	1.16e-08	44313.2	0.968742	-0.44229	0.077553	1.18e-08
Sarcomere negative	chr12:70320126_C_T	12	70320126	C	0.338158	-0.13762	0.029126	2.3e-06	42540.8	0.346723	-0.13762	0.029133	2.31e-06
Sarcomere negative	chr12:114188852_A_G	12	114188852	G	0.861939	-0.17977	0.038818	3.64e-06	45045.2	0.862982	-0.18282	0.03883	2.5e-06
Sarcomere negative	chr12:115381147_T_C	12	115381147	C	0.739526	0.225862	0.031734	1.1e-12	41607.7	0.727468	0.226923	0.031753	8.91e-13
Sarcomere negative	chr12:115618351_A_G	12	115618351	A	0.24289	0.164025	0.031456	1.84e-07	44384.1	0.227396	0.16684	0.031468	1.15e-07
Sarcomere negative	chr13:114078558_C_A	13	114078558	A	0.966591	-0.5338	0.073724	4.47e-13	45988.6	0.965913	-0.5338	0.073765	4.6e-13
Sarcomere negative	chr14:32931908_T_A	14	32931908	A	0.759384	-0.14725	0.032824	7.26e-06	41028.7	0.78231	-0.14725	0.032832	7.29e-06
Sarcomere negative	chr14:49368519_C_A	14	49368519	C	0.433184	-0.137	0.028392	1.4e-06	40805.2	0.402029	-0.137	0.0284	1.41e-06
Sarcomere negative	chr14:71719976_G_A	14	71719976	A	0.755859	-0.14835	0.031034	1.75e-06	45445.8	0.754227	-0.14835	0.031042	1.76e-06
Sarcomere negative	chr14:95219657_T_G	14	95219657	G	0.825644	0.212824	0.037618	1.54e-08	39636.8	0.818021	0.212824	0.037633	1.56e-08
Sarcomere negative	chr15:79057723_G_C	15	79057723	G	0.251419	0.160562	0.03067	1.65e-07	45618.8	0.23509	0.159797	0.030679	1.9e-07
Sarcomere negative	chr15:85253258_T_C	15	85253258	C	0.536799	-0.18102	0.026915	1.75e-11	44818.9	0.543433	-0.1805	0.026929	2.04e-11
Sarcomere negative	chr17:43705756_C_G	17	43705756	G	0.76459	-0.27653	0.031079	5.71e-19	46402.5	0.775058	-0.27653	0.031105	6.11e-19
Sarcomere negative	chr17:64307014_G_A	17	64307014	G	0.423536	-0.25248	0.028256	4.06e-19	41376	0.418994	-0.25248	0.028283	4.39e-19
Sarcomere negative	chr17:74433734_T_C	17	74433734	C	0.959773	-0.52512	0.118191	8.87e-06	14964.5	0.969103	-0.53355	0.118279	6.45e-06
Sarcomere negative	chr17:74490592_C_G	17	74490592	G	0.989908	-0.73482	0.163419	6.91e-06	30269.6	0.989904	-0.74633	0.163491	5e-06
Sarcomere negative	chr18:33907628_C_T	18	33907628	C	0.26536	-0.16087	0.032376	6.73e-07	39522.4	0.253779	-0.15672	0.03252	1.44e-06
Sarcomere negative	chr18:34000677_A_G	18	34000677	G	0.980958	-0.59132	0.096603	9.29e-10	46320.5	0.983712	-0.45445	0.098693	4.13e-06
Sarcomere negative	chr18:34223566_C_T	18	34223566	T	0.710363	-0.38192	0.029406	1.44e-38	45253	0.728626	-0.32589	0.030887	5.01e-26
Sarcomere negative	chr18:34280732_T_C	18	34280732	C	0.987446	-1.01387	0.108296	7.83e-21	55496	0.988603	-0.75797	0.111992	1.3e-11
Sarcomere negative	chr18:34289285_T_G	18	34289285	G	0.975825	-0.60657	0.085856	1.61e-12	46421.8	0.974419	-0.42862	0.088903	1.43e-06
Sarcomere negative	chr18:34315641_G_C	18	34315641	C	0.969124	-0.36236	0.083531	1.44e-05	38686.9	0.976449	-0.38134	0.083613	5.1e-06
Sarcomere negative	chr18:34367369_C_G	18	34367369	G	0.986649	-0.56848	0.118896	1.74e-06	43374	0.987777	-0.67489	0.119255	1.52e-08
Sarcomere negative	chr18:55905426_G_C	18	55905426	C	0.886981	-0.20394	0.041593	9.42e-07	46573.4	0.905426	-0.20394	0.041603	9.48e-07
Sarcomere negative	chr18:74794283_T_C	18	74794283	C	0.970137	-0.37235	0.082266	6.01e-06	41195.2	0.977797	-0.37235	0.082286	6.04e-06
Sarcomere negative	chr19:22357468_G_A	19	22357468	G	0.012112	1.1995	0.264813	5.91e-06	9611.17	0.013005	1.1995	0.265082	6.04e-06
Sarcomere negative	chr19:41736453_C_G	19	41736453	C	0.068153	0.491483	0.106667	4.07e-06	11163.1	0.044277	0.487043	0.106766	5.07e-06
Sarcomere negative	chr19:43795683_A_C	19	43795683	C	0.970012	-0.36846	0.079837	3.93e-06	43563.6	0.970854	-0.36323	0.079859	5.4e-06
Sarcomere negative	chr19:46225518_A_C	19	46225518	C	0.852021	0.218703	0.04116	1.08e-07	37804.7	0.844658	0.234823	0.04136	1.37e-08
Sarcomere negative	chr19:46502061_A_G	19	46502061	G	0.862491	-0.15881	0.039644	6.18e-05	43337.9	0.863173	-0.17912	0.039829	6.89e-06
Sarcomere negative	chr20:59879794_T_G	20	59879794	G	0.979801	-0.63784	0.140667	5.78e-06	20615.6	0.979812	-0.63784	0.140734	5.84e-06
Sarcomere negative	chr21:30598750_A_C	21	30598750	C	0.93046	0.261973	0.057288	4.81e-06	38034	0.94404	0.261973	0.057303	4.84e-06
Sarcomere negative	chr22:24159307_A_T	22	24159307	A	0.223757	0.323226	0.03202	5.84e-24	45276.8	0.191321	0.322695	0.032056	7.76e-24
Sarcomere negative	chr22:27109475_C_T	22	27109475	T	0.747321	0.157316	0.032995	1.86e-06	39286.8	0.752443	0.156153	0.033004	2.23e-06
Sarcomere negative	chr22:40726749_C_T	22	40726749	C	0.483208	-0.13324	0.028911	4.05e-06	38695.1	0.489823	-0.13324	0.028919	4.07e-06
Sarcomere positive	chr1:16358932_T_C	1	16358932	C	0.669477	-0.19985	0.039483	4.16e-07	34112.6	0.669676	-0.19985	0.039497	4.2e-07
Sarcomere positive	chr4:157332033_T_C	4	157332033	T	0.335504	0.207102	0.041402	5.67e-07	30790.4	0.345177	0.207102	0.041418	5.72e-07
Sarcomere positive	chr5:138398104_A_C	5	138398104	C	0.771933	-0.23573	0.047676	7.64e-07	29403.5	0.770752	-0.23573	0.047695	7.71e-07
Sarcomere positive	chr7:128445266_C_T	7	128445266	C	0.183542	0.241196	0.049443	1.07e-06	32121.8	0.174006	0.241196	0.049461	1.08e-06
Sarcomere positive	chr8:21839668_A_G	8	21839668	A	0.131331	0.303113	0.055135	3.85e-08	33926.3	0.111805	0.303113	0.055159	3.9e-08
Sarcomere positive	chr8:136606400_G_A	8	136606400	G	0.018147	0.716997	0.146362	9.64e-07	30828.6	0.018485	0.716997	0.146417	9.73e-07
Sarcomere positive	chr10:114487812_A_G	10	114487812	A	0.277143	0.206028	0.041723	7.89e-07	33742.6	0.263085	0.206584	0.041738	7.44e-07
Sarcomere positive	chr10:115351569_G_A	10	115351569	G	0.082447	0.331515	0.06703	7.58e-07	34621.6	0.085963	0.33366	0.067053	6.49e-07
Sarcomere positive	chr10:121419487_G_C	10	121419487	G	0.274602	0.259364	0.041914	6.09e-10	33612.9	0.271601	0.260158	0.041938	5.52e-10
Sarcomere positive	chr11:14467795_A_G	11	14467795	A	0.011951	0.84687	0.169321	5.69e-07	34760.2	0.015729	0.84687	0.169379	5.74e-07
Sarcomere positive	chr13:29537036_G_C	13	29537036	C	0.906387	-0.29665	0.060001	7.65e-07	38526.1	0.907212	-0.29665	0.060019	7.71e-07
Sarcomere positive	chr13:73870643_T_C	13	73870643	T	0.020575	0.701989	0.141813	7.42e-07	29033	0.018108	0.701989	0.14187	7.49e-07
Sarcomere positive	chr14:68252852_T_A	14	68252852	T	0.044183	0.506141	0.09031	2.09e-08	34158.5	0.048147	0.50486	0.090351	2.3e-08
Sarcomere positive	chr14:77630603_A_T	14	77630603	A	0.042177	0.444331	0.085233	1.86e-07	40098.3	0.0397	0.443031	0.085261	2.03e-07
Sarcomere positive	chr15:38846708_A_G	15	38846708	A	0.023154	0.655858	0.135521	1.3e-06	28325.5	0.018728	0.655858	0.135575	1.31e-06
Sarcomere positive	chr15:85330745_T_C	15	85330745	T	0.463884	0.233509	0.038008	8.06e-10	32740.2	0.461843	0.233509	0.038029	8.24e-10
Sarcomere positive	chr16:10357718_C_T	16	10357718	T	0.533148	-0.19474	0.04024	1.3e-06	29195.1	0.551119	-0.19474	0.040255	1.31e-06
Sarcomere positive	chr17:67322589_T_C	17	67322589	T	0.015192	0.707858	0.141028	5.19e-07	39549.7	0.0161	0.707858	0.141071	5.23e-07
Sarcomere positive	chr18:34263060_C_G	18	34263060	G	0.645341	-0.22069	0.039236	1.86e-08	33390.1	0.651726	-0.22069	0.039254	1.89e-08
Sarcomere positive	chr20:17311059_A_C	20	17311059	C	0.549042	-0.20848	0.0388	7.73e-08	31564.4	0.566732	-0.20848	0.038817	7.83e-08
Sarcomere positive	chr21:30534685_A_G	21	30534685	A	0.16049	-0.30961	0.060654	3.32e-07	23732	0.157084	-0.30961	0.060686	3.36e-07
* Variants on chromosome 11:43656852-70419528 are masked from the all-comer and sarcomere-positive COJO analyses results since many of the associations are expected to tag rare founder pathogenic variants in MYBPC3 (see PMIDs 33495596 and 33495597 for a discussion/dissection of the chromosome 11 locus in HCM). Abbreviations: b, effect size; bJ, effect size of the joint analysis; bJ_se, standard e…
Reported statistical results are from COJO using the summary statistics of the fixed-effects meta-analysis combining up to 7 case-control GWAS. P values are not corrected for multiple testing.

## Sheet: ST4
Supplementary Table 4: Common variant heritability in hypertrophic cardiomyopathy (HCM)
Back to list
A) Genome-wide heritability using LDSC
Analysis	Cases	Controls	h2SNP*	SE
All comers	5900	68359	0.17	0.02
HCMSARC+	1776	29414	0.04	0.03
HCMSARC-	3860	38942	0.21	0.02
B) Genome-wide heritability using GREML (meta-analysis of 3 largest strata)
Analysis	HCMR		CAN		NL		Meta-analysis (fixed effects)			Meta-analysis (random effects)
	h2SNP*	SE	h2SNP*	SE	h2SNP*	SE	h2SNP*	SE	P	h2SNP*	SE	P
All comers	0.27	0.02	0.42	0.04	0.08	0.03	0.25	0.02	<0.0001	0.26	0.1	0.0095
HCMSARC+	0.12	0.05	0.61	0.13	0.12	0.07	0.16	0.04	<0.0001	0.26	0.15	0.086
HCMSARC-	0.3	0.03	0.47	0.06	0.1	0.06	0.29	0.02	<0.0001	0.29	0.1	0.0062
*Heritability attributable to common genetic variation (h2SNP) using LDSC (A) and GREML (B) reported on a liability scale assuming a disease prevalence of 0.002. Reported P values not corrected for multiple testing.
Abbreviations: CAN, Canadian stratum; GREML, Genome-based restricted maximum likelihood method; LDSC, linkage disequilibrium score regression method; HCMR, Hypertrophic cardiomyopathy registry stratum; HCMSARC-, non-sarcomeric hypertrophic cardiomyopathy (absence of rare disease causing variant); HCMSARC+, sarcomeric hypertrophic cardiomyopathy (in presence of rare disease causing variant); NL, N…

## Sheet: ST5
Supplementary Table 5: UK Biobank cardiac magnetic resonance cohort - clinical and imaging characteristics
Back to list
Variable	Entire cohort (N=36,083)	Male (N=16,738)	Female (N=19,345)
Age at CMR, years, mean (SD)	63.4 (7.5)	63.9 (7.7)	62.9 (7.4)
Height, cm, mean (SD)	169.5 (9.2)	176.7 (6.6)	163.4 (6.2)
Weight, kg, mean (SD)	76 (15.0)	83.9 (13.2)	69.1 (12.9)
Body mass index, kg/m2, mean (SD)	26.34 (4.3)	26.9 (3.8)	25.9 (4.6)
Systolic blood pressure, mmHg, mean (SD)	138.2 (18.3)	141.6 (17.0)	135.2 (18.8)
Diastolic blood pressure, mmHg, mean (SD)	78.6 (10.0)	80.7 (9.7)	76.9 (9.9)
Mean arterial pressure, mmHg, mean (SD)	98.5 (11.5)	101.0 (10.9)	96.3 (11.6)
Hypertension (by ICD10 or self-reported), N (%)	9,105 (25.2)	5,071 (30.3)	4,034 (20.9)
Dyslipidaemia (by ICD10 or self-reported), N (%)	5,640 (15.6)	3,355 (20.0)	2,285 (11.8)
Diabetes (by ICD10 or self-reported), N (%)	1,511 (4.2)	934 (5.6)	577 (3.0)
Imaging centre (Cheadle), N (%)	19,404 (53.8)	9,123 (54.5)	10,281 (53.1)
UK BiLEVE array, N (%)	3,281 (9.1)	1,683 (10.1)	1,598 (8.3)
10 left ventricular phenotypes included in the GWAS
Left ventricular end-diastolic volume, indexed* [LVEDVi], ml/m2	77.7 (13.8)	83.0 (14.6)	73.2 (11.2)
Left ventricular end-systolic volume, indexed* [LVESVi], ml/m2	31.5 (8.2)	35.0 (8.6)	28.5 (6.5)
Left ventricular ejection fraction [LVEF], %	59.7 (6.0)	58.0 (5.9)	61.2 (5.6)
Left ventricular mass, indexed* [LVMi], g/m2	44.9 (8.3)	50.5 (7.4)	40.0 (5.5)
Left ventricular concentricity index [LVconc], g/ml	0.58 (0.09)	0.62 (0.09)	0.55 (0.07)
Mean left ventricular wall thickness [meanWT], mm	5.7 (0.8)	6.2 (0.7)	5.2 (0.5)
Maximal left ventricular wall thickness [maxWT], mm	9.4 (1.6)	10.3 (1.4)	8.6 (1.3)
Global radial strain [strainrad], %	45.3 (8.3)	42.5 (7.7)	47.7 (7.9)
Global longitudinal strain [strainlong], %	-18.5 (2.8)	-17.9 (2.7)	-19.2 (2.7)
Global circumferential strain [straincirc], %	-22.4 (3.3)	-21.2 (3.2)	-23.4 (3.1)
*Indexed values are derived by dividing measure by body surface area (BSA).
Abbreviations: ICD10, international classification of diseases code 10th revision; N, number; SD, standard deviation.

## Sheet: ST6
Supplementary Table 6: UK Biobank cardiac magnetic resonance cohort - genome-wide significant loci and HCM lookups
Back to list
Locus	Lead SNP	GRCh37	Pubmed ID if in GWAS catalog (LV imaging trait, as of November 2022) ##		Proxy variant for OpenTargets	Proxy R^2	Closest Gene	OpenTargets V2G Gene	FUMA mapped gene with evidence in mendelian heart disease	minP	Lead LV trait	Other LV traits with P<5x10-8	EA	NEA	EAF	LVEF#			LVconc			LVM (indexed for BSA)			LVEDV (indexed for BSA)			LVESV (indexed for BSA)			straincirc			strainrad			strainlong			meanWT			maxWT			HCM*
				Associated traits at P<5x10-8 in Pirruccello et al, 2022 (PMID 35697867)												b	SE	P	b	SE	P	b	SE	P	b	SE	P	b	SE	P	b	SE	P	b	SE	P	b	SE	P	b	SE	P	b	SE	P	Proxy-EA(R2)	b	SE	P
1	rs2503715	1:2144107	37126556		NA	NA	FAAP20	FAAP20		3.5e-10	LVconc	strain_circ	A	G	0.127376	-0.289922	0.0663162	1.3e-05	-0.00521196	0.000841498	3.5e-10	-0.126566	0.071629	0.077	0.483249	0.143552	0.00076	0.43069	0.0851804	2e-07	0.205798	0.0358198	5.3e-09	-0.412153	0.0892288	3.9e-06	0.0952761	0.031724	0.0027	-0.0242683	0.00571712	2.2e-05	-0.0511248	0.0136898	0.00019	NA	-0.211117	0.043331	1.12e-06
2	rs10864434	1:6262231			NA	NA	RNF207	RNF207		1.9e-08	LVESV		A	T	0.597354	0.191028	0.0440833	9.2e-06	0.00196417	0.000559381	0.00049	-0.097061	0.047616	0.042	-0.401002	0.0954273	2.6e-05	-0.314833	0.0566244	1.9e-08	-0.101473	0.0238183	1.1e-05	0.239318	0.0593326	5.5e-05	-0.0511797	0.0211078	0.015	0.00268579	0.00380111	0.48	0.0160124	0.00910288	0.079	rs11121478-A(0.9917)	0.111924	0.027039	3.52e-05
3	rs1048237	1:16341733	32382064, 33495596, 35278270, 35697867	RVEF,LVESV,LVESV Indexed,RVESV Indexed,LVEF	NA	NA	CLCNKA	HSPB7		1.3e-20	LVESV	LVEF,strain_circ,strain_rad	T	C	0.409444	0.378308	0.0428002	4.3e-19	0.00176653	0.000543099	0.00061	-0.160241	0.0462288	0.00053	-0.499019	0.0926471	7.2e-08	-0.502544	0.0549748	1.3e-20	-0.19012	0.0231206	2e-17	0.367109	0.0575947	1.8e-10	-0.0887871	0.0204603	1.4e-05	-0.000308031	0.00368979	0.93	0.0165823	0.00883191	0.06	NA	0.236953	0.021567	4.78e-28
4	rs539855797	1:26383248			rs11247852	0.8326	SLC30A2	TRIM63	TRIM63	7.9e-11	strain_long		ATT	A	0.747902	-0.0687984	0.0493416	0.2	-9.79369e-05	0.000626105	0.87	-0.0905879	0.0532941	0.089	-0.0919999	0.106807	0.39	0.0233784	0.0633767	0.68	0.118376	0.0266593	1.3e-05	-0.215046	0.0664096	0.0012	0.153575	0.0236161	7.9e-11	-0.00158678	0.00425421	0.71	0.0197959	0.0101882	0.052	rs11247852-G(0.8326)	-0.044583	0.027191	0.101076
5	rs9429079	1:46003445			NA	NA	PRDX1	TESK2		6.3e-09	LVESV		T	C	0.564354	0.129668	0.0426438	0.0027	0.00203729	0.000541114	0.00011	-0.153493	0.0460613	0.00086	-0.503026	0.0923114	5.1e-08	-0.314361	0.0547756	6.3e-09	-0.0700327	0.0230374	0.0013	0.0772586	0.0573873	0.18	-0.0120763	0.0203994	0.55	0.00164102	0.00367671	0.66	-0.00899534	0.00880323	0.31	NA	0.044327	0.021783	0.041874
6	rs4073778	1:116297758	33495596		NA	NA	CASQ2	CASQ2	CASQ2	5.8e-12	strain_rad	meanWT	C	A	0.437844	-0.0406515	0.0429606	0.25	0.00120381	0.000545134	0.018	0.196776	0.0464016	2.2e-05	0.237092	0.0929933	0.011	0.130466	0.0551802	0.022	-0.014965	0.0232101	0.65	0.397992	0.0578175	5.8e-12	-0.0869767	0.0205731	2.4e-05	0.0207367	0.00370455	2.2e-08	0.0318209	0.00886781	0.00033	NA	0.056219	0.022067	0.010864
7	rs11350672	2:36676177			rs2023549	0.8707	CRIM1	CRIM1		6.8e-09	LVEDV		GT	G	0.680595	-0.0158017	0.0461897	0.75	0.000987961	0.000586223	0.13	-0.243591	0.0498949	1e-06	-0.579984	0.100074	6.8e-09	-0.231439	0.0593612	7.3e-05	-0.0505209	0.0249649	0.053	0.0443296	0.0621356	0.48	-0.00138223	0.0221214	0.95	-0.00699555	0.00398169	0.079	-0.0273616	0.00954251	0.0041	rs2023549-G(0.8707)	0.015183	0.023641	0.520749
8	rs2723086	2:65297686			NA	NA	CEP68	CEP68		3.1e-08	meanWT		C	T	0.66255	0.141018	0.0445767	0.0013	0.00253918	0.000565751	2e-05	0.162608	0.0481519	0.00073	-0.0119007	0.0965779	0.9	-0.124872	0.0572875	0.032	-0.0769988	0.0240956	0.0015	0.142703	0.0599718	0.017	0.00792074	0.0213357	0.71	0.0212633	0.00384226	3.1e-08	0.0352569	0.00920594	0.00013	NA	0.08443	0.02249	0.000175
9	rs2562845	2:179514433	33495596, 32382064, 35278270, 35697867, 36944631	RA Max,RVEDV/LVEDV Ratio,LVESV,LVESV Indexed,LVEF,RVESV,RVESV Indexed,RVEF,LVEDV Indexed,LVSV Indexed,RA Min,RA FAC,RVSV Indexed,LVSV,RVEDV,RVEDV Indexed,LVEDV,LVESV,LVESV Indexed,RVESV,RVESV Indexed,RA Max Indexed,RA Min Indexed	NA	NA	PLEKHA3	FKBP7	TTN	5.6e-32	LVESV	LVEF,LVM,LVEDV,strain_circ,strain_rad	T	C	0.803573	-0.487188	0.0530386	4.2e-20	-0.000952108	0.000673146	0.19	0.536309	0.0572978	8e-21	1.04162	0.114922	1.3e-19	0.806108	0.0681686	5.6e-32	0.27809	0.0286641	1.2e-22	-0.538094	0.0713426	4.6e-14	0.129165	0.0254014	3.7e-07	0.0188764	0.00457177	3.6e-05	0.0245381	0.0109496	0.025	NA	-0.003323	0.026613	0.900621
10	rs17531631	2:201224637			NA	NA	SPATS2L	SPATS2L		2.3e-08	LVconc		G	T	0.657257	-0.100412	0.0448343	0.023	-0.00325676	0.000569021	2.3e-08	0.00509646	0.0484342	0.92	0.46433	0.0971441	1.8e-06	0.263694	0.0576234	3.4e-06	0.0684896	0.0242311	0.0021	-0.0269415	0.0603092	0.66	0.0138095	0.0214904	0.52	-0.0136098	0.00386479	0.00043	-0.0307841	0.00926101	0.00089	NA	-0.081508	0.023437	0.000509
11	rs2618146	2:218302013			NA	NA	TNP1	-		8.4e-10	meanWT		A	G	0.67449	-0.0996797	0.0454703	0.026	0.00214812	0.000577092	0.00027	0.21628	0.0491216	1.1e-05	0.0603774	0.0985228	0.54	0.0873303	0.0584412	0.11	0.0119662	0.0245758	0.73	0.0501562	0.061167	0.41	0.0288417	0.0217567	0.18	0.0240521	0.00391898	8.4e-10	0.0268006	0.00938943	0.0043	NA	0.047337	0.023274	0.041978
12	rs2170454	3:14294549	35697867	LVEDV,LVESV,RVEDV,RVESV,LVESV Indexed,LVEF,RVEDV Indexed,RVESV Indexed,RVEF	NA	NA	LSM3	SLC6A6	TMEM43	6.9e-13	LVESV	strain_circ	T	C	0.457772	0.220341	0.0425164	1.4e-07	0.00113949	0.000540197	0.03	-0.205275	0.0459557	7.9e-06	-0.495594	0.0920797	7.4e-08	-0.388969	0.0546201	6.9e-13	-0.127186	0.0229748	1.7e-08	0.273911	0.0572023	1.7e-06	-0.0456146	0.0203753	0.025	-0.00837008	0.00367009	0.023	-0.00153906	0.00878208	0.86	NA	0.112028	0.022287	5.09e-07
13	rs62253179	3:69906486	35278270, 36598836		NA	NA	MITF	MITF		4e-13	meanWT	LVconc,strain_rad	C	A	0.815736	-0.221481	0.055074	8.6e-05	-0.00481763	0.00069975	2.1e-11	-0.259412	0.059525	1.3e-05	0.230763	0.119268	0.053	0.271207	0.0707478	0.00023	0.143504	0.0297528	1.7e-06	-0.472804	0.074078	1.7e-10	0.0125967	0.0263599	0.63	-0.0344837	0.00475344	4e-13	-0.0544377	0.0113767	1.7e-06	NA	-0.106822	0.028386	0.000169
14	rs138545398	3:134419103	35697867	LVEDV,LVESV,LVESV Indexed,RVESV	NA	NA	KY	EPHB1		1.5e-09	LVESV		C	CG	0.930294	-0.342326	0.0836728	5.8e-05	-0.00214249	0.00106311	0.036	0.363576	0.09044	5.8e-05	0.885274	0.181211	1e-06	0.66459	0.107491	1.5e-09	0.121588	0.045216	0.009	-0.296335	0.112578	0.0085	0.0137121	0.0400967	0.73	0.00362815	0.00722498	0.62	0.0206832	0.0172964	0.23	rs76369427-A**	-0.093247	0.0433	0.0313
15	rs62287933	3:158290565	35697867	RVESV,RVEF,RVESV Indexed,LVESV,LVESV Indexed	NA	NA	MLF1	RARRES1		2.6e-09	LVESV	strain_circ	A	G	0.493789	0.168451	0.0424057	5.9e-05	0.000342233	0.000538791	0.48	-0.219273	0.0458358	1.7e-06	-0.458926	0.0918396	5.8e-07	-0.313668	0.0544776	2.6e-09	-0.121468	0.0229109	3.6e-08	0.129963	0.0570433	0.023	-0.0278313	0.0203122	0.17	-0.0102175	0.00366013	0.0052	-0.0222991	0.00875708	0.011	rs1836688-A(1.0)	0.08664	0.021544	5.84e-05
16	rs4894808	3:171833266	36598836		NA	NA	FNDC3B	FNDC3B		4e-09	LVconc		G	C	0.600338	-0.0188369	0.0441661	0.74	-0.00327085	0.000561158	4e-09	-0.0257897	0.0477384	0.59	0.364119	0.0956517	0.00014	0.172068	0.0567389	0.0018	0.0593379	0.0238656	0.0096	-0.104358	0.0594202	0.079	-0.0298343	0.0211577	0.16	-0.0131531	0.00381243	0.00056	-0.0493036	0.00912243	6.5e-08	rs4894803-A(0.8346)	-0.171397	0.023344	2.19e-13
17	rs144910885	4:16028920			NA	NA	PROM1	PROM1		1.1e-09	LVESV		A	AACACACACACAC	0.844434	-0.298645	0.05972	4.6e-07	-0.00126592	0.000757885	0.083	0.172978	0.0645824	0.0074	0.503864	0.129341	9.8e-05	0.466835	0.0768131	1.1e-09	0.15853	0.0322809	1.7e-06	-0.244152	0.0803058	0.0024	0.085946	0.0285717	0.0026	0.00777661	0.00515278	0.13	-0.0282476	0.012322	0.022	rs1850507-T**	-0.089419	0.026789	0.000849
18	rs10057570	5:56948712			NA	NA	ACTBL2	PLK2		8.4e-10	strain_circ		A	T	0.815619	0.220009	0.055044	0.0001	0.00157956	0.000699542	0.036	-0.033135	0.0595382	0.58	-0.348631	0.119343	0.0035	-0.297704	0.0707872	4.5e-05	-0.187674	0.0297573	8.4e-10	0.239199	0.074082	0.0012	-0.0487213	0.0263346	0.064	0.0066108	0.00475381	0.16	0.00671492	0.0113715	0.55	rs2161500-T(1.0)	0.1487	0.02881	2.5e-07
19	rs62370998	5:64322176	33495596		NA	NA	SREK1IP1	ADAMTS6		3.1e-08	strain_rad		G	C	0.827162	-0.210915	0.0561639	0.00025	-0.00107005	0.000713774	0.12	0.13639	0.0607468	0.025	0.382701	0.121766	0.0017	0.316114	0.0722241	9.3e-06	0.134969	0.0303571	1.2e-05	-0.418326	0.0755752	3.1e-08	0.0139888	0.0269084	0.6	0.00257133	0.00484924	0.6	0.00718778	0.0115987	0.54	rs713172-T(1.0)	0.006571	0.030188	0.827684
20	rs11242465	5:138762305	35278270, 35697867	LVESV,LVESV Indexed,LVEF,RA Min	NA	NA	DNAJC18	DNAJC18		3.9e-11	strain_circ	LVEF,LVESV	T	G	0.274692	0.312451	0.0474979	4.8e-11	0.00131637	0.00060364	0.044	-0.0588908	0.0513766	0.25	-0.282382	0.102983	0.0061	-0.364343	0.0610836	2.6e-09	-0.173349	0.0256708	3.9e-11	0.32434	0.0639086	3.9e-07	-0.0457476	0.022735	0.044	0.0026109	0.00410113	0.52	0.0126358	0.0098112	0.2	NA	0.148878	0.023809	4.16e-10
21	rs12521291	5:143507425	35697867	LVEF,RVEF/LVEF Ratio,RVESV/LVESV Ratio	NA	NA	YIPF5	YIPF5		1.4e-08	LVEF		G	A	0.334583	0.254505	0.0450108	1.4e-08	0.00153528	0.000572032	0.013	-0.0179668	0.0486854	0.71	-0.253481	0.0975891	0.0094	-0.302637	0.057884	1.7e-07	-0.106222	0.0243314	1.9e-05	0.0967875	0.0605741	0.11	0.0113583	0.0215384	0.6	0.00226993	0.00388657	0.56	0.0325816	0.00929794	0.00046	NA	-0.021031	0.022986	0.360217
22	rs146170154	6:36646768	28394258, 33495596, 35697867, 36598836	Asc Aorta Diam,RVEDV/LVEDV Ratio,RVESV/LVESV Ratio,RVEF/LVEF Ratio,Prox PA Diastole,LVESV Indexed,LVEF,Prox PA Systole	NA	NA	CDKN1A	CDKN1A		7.5e-22	LVconc	LVEF,LVESV,strain_circ,strain_rad,meanWT,maxWT	C	CTA	0.799688	-0.282967	0.053473	1.7e-08	-0.00649071	0.000678939	7.5e-22	-0.287354	0.0578962	6.9e-07	0.379039	0.115924	0.0011	0.382365	0.0688194	1.9e-08	0.251777	0.0289185	1.2e-19	-0.531382	0.0719714	1.5e-13	0.0630219	0.0255526	0.014	-0.0413493	0.00461724	3.4e-19	-0.0681851	0.011052	6.9e-10	rs4151702-G**	-0.26305	0.026186	1.03e-23
23	rs9462738	6:41664501	28394258, 36598836		NA	NA	TFEB	TFEB		3.7e-08	maxWT		G	T	0.656958	0.0488367	0.0445179	0.23	0.00206556	0.000565238	0.00034	0.228913	0.0482017	2e-06	0.104922	0.0965131	0.28	0.0121765	0.0572959	0.86	-0.0688141	0.0240804	0.0031	0.058665	0.0599306	0.33	0.0193368	0.0213033	0.36	0.0205281	0.00384455	9.3e-08	0.0506424	0.00920114	3.7e-08	NA	0.022519	0.023005	0.327636
24	rs2146324	6:43756863	35697867	LVEDV,LVEDV Indexed	NA	NA	VEGFA	VEGFA		4.9e-09	LVconc		A	C	0.260942	-0.0486506	0.0489035	0.27	-0.00365898	0.000620921	4.9e-09	0.0468499	0.0529516	0.38	0.565511	0.106024	9.6e-08	0.266493	0.0629418	1.6e-05	0.00912938	0.026451	0.63	0.00163698	0.0658305	0.98	-0.045711	0.0234133	0.051	-0.0137151	0.00422245	0.0012	-0.0289847	0.010109	0.0041	NA	-0.043802	0.027438	0.110387
25	rs205653	6:91212135			NA	NA	MAP3K7	MAP3K7		1.7e-08	strain_circ		C	A	0.596387	0.149155	0.0434294	0.00035	0.00141809	0.000551417	0.0092	-0.021782	0.0470234	0.64	-0.237017	0.0941537	0.012	-0.210428	0.0558952	0.00014	-0.127412	0.0234915	1.7e-08	0.20344	0.0584649	0.0005	-0.022715	0.0207983	0.27	0.00524126	0.00375058	0.16	0.00430198	0.00898041	0.63	NA	0.024457	0.022855	0.284571
26	rs1743241	6:118679974	33495596, 19584346, 32814899, 35479509, 35697867	LVSV,RA Min Indexed,RA Min,LVEDV Indexed,LVESV Indexed,LVEDV,LVESV	NA	NA	PLN	SLC35F1	PLN	2e-14	strain_long		G	A	0.438377	0.0285382	0.0428668	0.5	0.000709171	0.000544274	0.18	-0.158409	0.0464108	0.00064	-0.302326	0.0929272	0.0011	-0.143786	0.0551671	0.0091	0.0110417	0.0231844	0.63	-0.183471	0.0577006	0.0015	0.15688	0.0205002	2e-14	-0.0127592	0.00370142	0.00057	0.0206571	0.00885989	0.02	NA	0.087368	0.021549	5.08e-05
27	rs9375071	6:122186687	35479509, 35697867	LVSV,LVSV Indexed,LVEF	NA	NA	GJA1	HSF2		2.8e-08	strain_circ		A	G	0.897349	0.308509	0.0701988	8.9e-06	-0.00270286	0.000891305	0.0022	0.000831402	0.0760096	0.99	0.38547	0.152192	0.011	-0.0908101	0.0903502	0.25	-0.205148	0.0379669	2.8e-08	0.437438	0.0944908	3.7e-06	-0.122323	0.0336177	0.00027	-0.00994714	0.00606176	0.1	-0.00833381	0.0145138	0.57	rs9401451-G(0.969)	-0.045272	0.036222	0.211339
28	rs11367961	6:126085068	35697867, 36944631	RVEDV/LVEDV Ratio,RVESV/LVESV Ratio	rs1977141	0.9959	NCOA7	HEY2	TRDN	8.3e-09	LVconc		TA	T	0.388666	0.00408881	0.0436618	0.95	-0.00316827	0.000554368	8.3e-09	-0.0871625	0.0472707	0.065	0.305174	0.0946489	0.0013	0.116523	0.0561892	0.022	0.0217162	0.0236168	0.31	-0.11699	0.0587768	0.047	-0.0182771	0.0209028	0.38	-0.0192925	0.00377036	3.1e-07	-0.0252086	0.0090285	0.0052	rs1977141-A(0.9959)	-0.0822	0.02299	0.000352
29	rs13222723	7:35490155		Asc Aorta Diam Indexed,Prox PA Systole,Asc Aorta Diam,Prox PA Diastole,Prox PA Systole Indexed,Prox PA Diastole Indexed,Asc Aorta Diam	NA	NA	TBX20	TBX20		7.9e-09	strain_circ		A	C	0.692226	-0.1944	0.0460792	3.2e-05	-0.000680697	0.000585264	0.23	-0.0288853	0.0498259	0.56	0.0121346	0.0998627	0.9	0.156513	0.0592677	0.0097	0.141294	0.0249221	7.9e-09	-0.261503	0.0620273	2.5e-05	0.0602579	0.0220528	0.0063	-0.00311475	0.00397694	0.43	0.00623377	0.00951646	0.51	NA	-0.013308	0.02322	0.566568
30	rs143741275	7:46637890			NA	NA	IGFBP3	-		8e-11	LVM	LVESV	A	AGTGTGT	0.576518	0.195195	0.0436292	9.2e-06	-0.00073132	0.000554147	0.15	-0.306658	0.0471768	8e-11	-0.416617	0.0945534	1.1e-05	-0.316368	0.0561167	2.8e-08	-0.120409	0.0236008	1.6e-06	0.155236	0.0587389	0.0082	-0.0207018	0.0208815	0.32	-0.0203551	0.00376569	6.5e-08	-0.0319035	0.00900975	0.0004	rs12673771-C**	-0.043226	0.021771	0.047106
31	rs34373805	7:128486363	35697867	LVESV,LVEF,LVESV Indexed	NA	NA	FLNC	CCDC136	FLNC	2.4e-12	LVESV	LVEDV,strain_circ	C	T	0.8382	-0.298109	0.0579837	2e-07	-0.00174709	0.000736467	0.033	0.24652	0.0626983	8.4e-05	0.694959	0.125662	3.2e-08	0.508696	0.0745794	2.4e-12	0.192848	0.0313639	2.7e-10	-0.415441	0.07806	1e-07	0.0597026	0.0277369	0.031	0.00297077	0.00500434	0.55	-0.000578289	0.0119763	0.96	NA	-0.159002	0.029413	6.6e-08
32	rs4240678	8:11802426	33495596, 35278270		NA	NA	DEFB136	FDFT1		5e-14	strain_rad	LVEF,LVESV,strain_circ,strain_long	C	T	0.597129	0.252179	0.043159	2.8e-09	0.00235774	0.000548394	2.5e-05	0.0141316	0.0467157	0.76	-0.315517	0.0936032	0.00075	-0.322783	0.0555058	3.1e-09	-0.151824	0.0233399	2.7e-11	0.437501	0.0580883	5e-14	-0.119343	0.0206639	7.7e-09	0.0111344	0.00372636	0.0028	0.0198733	0.00891948	0.026	NA	0.064004	0.022413	0.004308
33	rs12541595	8:125857359	28394258, 29403010, 33495596, 31554410, 32382064, 32814899, 35278270, 35697867, 36598836	LVEF,LVESV,LVESV Indexed,RVEF	NA	NA	MTSS1	MTSS1		5.6e-17	LVEF	LVESV,strain_circ,maxWT	G	T	0.69027	-0.388698	0.0460319	5.6e-17	-0.00275786	0.000584899	9.7e-07	0.0652628	0.0498249	0.19	0.462814	0.099833	3.6e-06	0.48313	0.0592	1.7e-16	0.173153	0.0248944	7.5e-12	-0.283121	0.061957	4.9e-06	0.0243868	0.0220357	0.27	-0.00890137	0.00397458	0.025	-0.0560585	0.00951519	3.8e-09	NA	-0.149316	0.023519	2.24e-10
34	rs62521953	8:141988944	36598836	Asc Aorta Diam,Prox PA Systole Indexed,Prox PA Systole	NA	NA	PTK2	PTK2		5.3e-09	maxWT		A	G	0.506818	-0.0479776	0.0438372	0.28	-0.00265031	0.000557013	4.1e-06	-0.191335	0.0474501	5.5e-05	0.0267873	0.0950745	0.78	0.0423369	0.0563783	0.49	0.0437935	0.0237025	0.053	-0.130312	0.0589907	0.027	-0.00812319	0.0209928	0.7	-0.0183987	0.00378464	1.2e-06	-0.0528839	0.00905859	5.3e-09	rs4961300-A(0.8454)	-0.051577	0.021833	0.018183
35	rs11784619	8:145013775	33495596	PA/Ao Diastole,RVESV,RVEF,RVESV Indexed	NA	NA	PLEC	PLEC		2e-09	strain_rad	LVEF	G	A	0.94307	-0.535626	0.0925194	5.2e-09	-0.00140278	0.00117559	0.24	0.114685	0.100143	0.25	0.350609	0.200654	0.081	0.543911	0.118986	7.4e-06	0.230342	0.0500327	2.7e-06	-0.747062	0.124521	2e-09	0.0478295	0.044241	0.28	-0.00832947	0.00798914	0.3	-0.0123266	0.0191288	0.52	NA	-0.129742	0.05059	0.01035
36	rs11000728	10:75404300	36598836, 36944631		NA	NA	MYOZ1	MYOZ1	VCL	3.6e-09	maxWT	meanWT	C	G	0.859062	-0.0277393	0.0608858	0.74	-0.00365249	0.000773371	1.9e-06	-0.313672	0.0658774	1.9e-06	-0.101594	0.132022	0.44	0.00933397	0.0782912	1	0.105898	0.0329134	0.0013	-0.227212	0.0819503	0.0056	0.0781684	0.0291187	0.0073	-0.0304566	0.0052565	6.9e-09	-0.0742622	0.0125837	3.6e-09	rs4746139-A(0.9915)	-0.226219	0.030491	1.23e-13
37	rs111555687	10:91579667			NA	NA	KIF20B	KIF20B		1.4e-08	LVM		T	C	0.976145	-0.251353	0.14224	0.066	0.00638328	0.00180673	0.00025	0.873976	0.153903	1.4e-08	0.70526	0.308431	0.022	0.509684	0.182904	0.0069	0.16234	0.0769416	0.048	-0.117165	0.191575	0.54	0.172875	0.0681834	0.011	0.0657012	0.0122873	8.9e-08	0.145179	0.029354	7.6e-07	NA	0.019215	0.081007	0.812496
38	rs1886601	10:114490159		Asc Aorta Diam Indexed,Asc Aorta Diam	NA	NA	TCF7L2	TCF7L2		2.3e-08	meanWT		G	T	0.702059	-0.0792271	0.0464908	0.065	-0.00279727	0.000590526	2.6e-06	-0.186556	0.0503026	0.00021	0.0519129	0.10081	0.61	0.0706456	0.0597816	0.23	0.0937817	0.0251293	0.00026	-0.263696	0.0625688	2.5e-05	-0.0308807	0.0222663	0.17	-0.0224156	0.00401291	2.3e-08	-0.0421258	0.0096064	1.2e-05	NA	-0.176972	0.023233	2.71e-14
39	rs72840788	10:121415685	32382064, 32382064, 33495596, 32605384, 35278270, 35479509, 35697867	LVEDV Indexed,LVEDV,LVESV,LVESV Indexed,RVESV,RVESV Indexed,LVEF,RVEF	NA	NA	BAG3	MCMBP	BAG3	9e-36	LVESV	LVEF,LVEDV,strain_circ,strain_rad	G	A	0.785096	-0.619938	0.0520975	2.3e-32	-0.00303495	0.000661742	5.7e-06	0.247463	0.0563647	1.1e-05	0.839005	0.112958	1.1e-13	0.832694	0.066986	9e-36	0.347296	0.0281584	3e-35	-0.589944	0.0701108	3.9e-17	0.127916	0.0249131	2.8e-07	6.03446e-05	0.0044964	0.99	-0.0227334	0.0107612	0.035	NA	-0.37527	0.025514	6.34e-49
40	rs2618512	11:14075947		LVESV Indexed,LVESV,LVEF	NA	NA	SPON1	SPON1	RRAS2	1.3e-09	LVESV	LVEDV,strain_circ	A	G	0.522014	-0.160813	0.0428369	0.00012	-0.00187736	0.000543922	0.00032	0.153984	0.046321	0.00089	0.550426	0.0927979	3e-09	0.330753	0.0550796	1.3e-09	0.125513	0.0231719	3.6e-08	-0.266447	0.0576538	3.8e-06	0.0229584	0.0204977	0.26	-0.00143932	0.00369644	0.7	-0.000603851	0.00884765	0.95	rs2697821-G**	-0.107797	0.021425	4.96e-07
41	rs781094097	11:47519794	36598836, 36944631	Prox PA Systole,Prox PA Diastole,PA Root	rs7129948	1	MTCH2	FNBP4	MYBPC3	1.1e-10	meanWT		ACAAAAAGTT	A	0.857332	0.107597	0.0603195	0.074	-0.00235861	0.000765907	0.0022	-0.331766	0.0652236	3.6e-07	-0.219813	0.130667	0.093	-0.172302	0.0775564	0.028	-0.057457	0.0326325	0.055	0.0936103	0.0811924	0.25	-0.0759432	0.0289083	0.0086	-0.0335528	0.0052042	1.1e-10	-0.0620634	0.0124596	6.3e-07	rs7129948-C(1.0)	-0.002864	0.03119	0.926804
42	rs113819537	12:26348429			NA	NA	BHLHE41	SSPN		2.1e-08	strain_circ		C	G	0.749207	0.142422	0.0488756	0.0028	0.00202438	0.000620529	0.001	-0.0354974	0.0528196	0.5	-0.345194	0.105868	0.0011	-0.259174	0.062861	1.6e-05	-0.144879	0.0264258	2.1e-08	0.186373	0.0657838	0.0046	-0.0305239	0.0233812	0.19	0.00851421	0.00421662	0.043	0.0263719	0.0100954	0.009	rs58747679-T(0.7926)	0.118238	0.024414	1.3e-06
43	rs117742247	12:89991313		Asc Aorta Diam	NA	NA	POC1B-GALNT4	POC1B		1.1e-09	meanWT		C	T	0.835856	0.0175626	0.0580191	0.83	0.00369564	0.000736616	7.9e-07	0.245404	0.0627007	9.1e-05	-0.0312014	0.125673	0.8	-0.0216457	0.0746207	0.78	0.000532598	0.0313661	0.98	0.0267682	0.078082	0.73	0.0286441	0.0277669	0.3	0.0305158	0.00500444	1.1e-09	0.039133	0.0119824	0.0011	rs57481061-C(0.9753)	0.036906	0.028706	0.198546
44	rs653178	12:112007756	32382064, 33495596, 28394258, 35697867	Asc Aorta Diam Indexed,RVEDV,RVESV,Prox PA Diastole,PA/Ao Diastole,LVEDV,LVEDV Indexed,LVESV,LVESV Indexed,LVSV Indexed,PA/Ao Systole,RVESV Indexed,RVEDV Indexed,RVSV,LVSV	NA	NA	ATXN2	SH2B3	MYL2/PTPN11	4.8e-13	LVEDV	LVESV	C	T	0.470803	0.0927317	0.0425399	0.024	0.00238453	0.000540091	1e-05	-0.238767	0.0459637	2.1e-07	-0.666072	0.0921265	4.8e-13	-0.34102	0.0547018	1.4e-10	-0.0318266	0.0229977	0.15	-0.0288315	0.0572499	0.61	0.0289882	0.0203456	0.15	-0.0022073	0.00366905	0.55	0.000664018	0.0087845	0.94	rs17696736-G(0.7119)***	0.038237	0.023592	0.105068
45	rs116904997	12:120668534	33495596, 35697867, 36598836	LVESV,LVESV Indexed,LVEF	NA	NA	RPLP0	PXN		2e-11	LVconc	strain_circ	G	A	0.977694	0.594892	0.144108	8.1e-05	0.0118954	0.0018296	2e-11	0.306191	0.155736	0.049	-1.0561	0.312147	0.00072	-0.877571	0.185343	4.1e-06	-0.447614	0.0778536	1.4e-08	0.778277	0.193807	5.9e-05	-0.0859719	0.0690597	0.21	0.066148	0.012426	1e-07	0.159564	0.0297776	8.4e-08	NA	0.234532	0.083421	0.004946
46	rs7143356	14:23881083	35697867	LVSV Indexed,LVSV,RA FAC	NA	NA	MYH6	NGDN	MYH7	1.9e-10	LVEDV	LVM	T	C	0.621178	0.0690215	0.0436605	0.1	-0.00112199	0.000554678	0.031	0.268898	0.04724	1.3e-08	0.60322	0.0946499	1.9e-10	0.183548	0.0561795	0.0013	-0.0572276	0.023617	0.022	0.201956	0.0587529	0.00059	-0.0530941	0.0208747	0.011	0.00317511	0.00376992	0.4	0.018035	0.00902202	0.046	NA	0.036982	0.022128	0.094658
47	rs4904572	14:89897964			NA	NA	FOXN3	FOXN3		2.9e-09	strain_circ		T	C	0.304661	-0.153491	0.0477369	0.00051	-0.000854615	0.000606466	0.14	-0.0261811	0.0516499	0.61	0.0631069	0.103485	0.54	0.138619	0.0614238	0.013	0.143348	0.0258246	2.9e-09	-0.283038	0.0642449	1.1e-05	0.0273142	0.0228281	0.23	-0.00415521	0.00412252	0.31	-0.00665709	0.00986186	0.5	NA	-0.046967	0.025558	0.066122
48	rs8039472	15:85361644	33495596, 35697867, 36598836	LVEDV,LVESV,LVESV Indexed,RVESV/LVESV Ratio,RVEF/LVEF Ratio,LVEF	NA	NA	ALPK3	NMB	ALPK3	2.3e-26	LVconc	meanWT,maxWT	A	G	0.476782	-0.161189	0.0425194	0.00037	-0.00582403	0.000539751	2.3e-26	-0.205393	0.0460131	8.1e-06	0.397979	0.0921808	1.6e-05	0.291845	0.0546933	2.1e-07	0.119463	0.0229906	4.4e-07	-0.233594	0.0572207	4.5e-05	0.0010153	0.020342	0.96	-0.0372755	0.00366982	3.1e-24	-0.0611255	0.00878211	3.4e-12	NA	-0.178528	0.021818	2.92e-16
49	rs6598541	15:99271135	33495596, 36944631		NA	NA	IGF1R	IGF1R		5e-15	meanWT	LVconc,LVM	A	G	0.358021	0.104153	0.0442929	0.022	-0.00435954	0.000562264	7.4e-15	-0.300406	0.047933	3.7e-10	0.0388088	0.0960271	0.69	-0.0599013	0.0569754	0.27	-0.0292388	0.0239425	0.23	0.0355369	0.0595899	0.55	-0.0560332	0.0211998	0.0082	-0.0299202	0.00382218	5e-15	-0.017899	0.00914666	0.05	NA	-0.00855	0.022458	0.703428
50	rs8062800	16:1006371	35697867	LVESV Indexed,Asc Aorta Diam Indexed	NA	NA	LMF1	LMF1		1.7e-09	strain_circ		G	C	0.613078	-0.111901	0.0435848	0.0093	-0.0025092	0.000553767	6.6e-06	0.0601133	0.0471698	0.2	0.43728	0.0944822	3.7e-06	0.257509	0.056057	3e-06	0.137165	0.0235711	1.7e-09	-0.241964	0.0586553	3.7e-05	0.000534199	0.0208513	0.98	-0.00754125	0.00376421	0.045	-0.0108404	0.00901051	0.23	rs2729577-A(1.0)	-0.062628	0.022358	0.005105
51	rs72831120	16:81730005			NA	NA	PLCG2	CMIP		3.3e-08	LVM		A	G	0.890516	-0.0944606	0.0680044	0.11	-0.000813459	0.00086403	0.38	-0.406664	0.0736002	3.3e-08	-0.574446	0.147423	9.8e-05	-0.157043	0.0874671	0.071	0.0294612	0.0367706	0.35	-0.127239	0.0915013	0.16	0.0328819	0.0325434	0.31	-0.0185703	0.00587255	0.0016	-0.0413394	0.0140529	0.0033	NA	0.05147	0.036969	0.163829
52	rs7502466	17:1372970	33495596, 35697867	LVESV Indexed,LVEF,LVESV	NA	NA	CRK	MYO1C		4e-11	LVEDV	LVESV	G	A	0.891027	-0.156069	0.0686189	0.022	-0.00457732	0.000871516	1.1e-07	0.210274	0.0742372	0.0046	0.982783	0.148814	4e-11	0.548203	0.0883113	3.6e-10	0.12665	0.0370986	0.00085	-0.194698	0.0923277	0.035	-0.0309895	0.0328585	0.35	-0.0146223	0.0059206	0.014	-0.0233299	0.0141786	0.1	NA	-0.072145	0.038343	0.059909
53	rs11869286	17:37813856	37126556		NA	NA	TCAP	PGAP3		2.7e-10	LVM		G	C	0.336031	-0.0428404	0.0449278	0.33	-0.00164923	0.000570621	0.0028	-0.306966	0.0486082	2.7e-10	-0.34069	0.0974386	0.00047	-0.0995923	0.0578235	0.1	0.0115444	0.0242947	0.67	-0.0265091	0.0604627	0.66	-0.0456967	0.021493	0.033	-0.0179789	0.00387655	3.5e-06	-0.0296415	0.00927913	0.0014	rs931992-G(1.0)***	-0.056642	0.024723	0.021983
54	rs2732685	17:44339408	33495596, 36598836, 36944631		NA	NA	LRRC37A	KANSL1		2.5e-19	meanWT	LVconc,LVM,maxWT	C	T	0.776903	-0.000242102	0.0512581	0.99	-0.00533512	0.00065102	3.4e-17	-0.352266	0.055457	2.1e-10	0.0930289	0.111167	0.4	0.0353683	0.0659707	0.52	0.0258312	0.0277159	0.27	-0.0928199	0.068977	0.18	-0.0439378	0.0245561	0.074	-0.0397488	0.00442245	2.5e-19	-0.0827433	0.0105863	5.4e-15	rs2732705-T(0.9424)	-0.240655	0.02793	7.3e-18
55	rs12452367	17:53374610	35697867, 36598836	LVESV Indexed	NA	NA	HLF	HLF		2.1e-10	LVESV	strain_circ	T	C	0.7155	-0.250828	0.047251	6.5e-08	-0.00284302	0.000600126	2.2e-06	-0.00422935	0.0511216	0.93	0.395079	0.102477	0.00012	0.372598	0.0608134	2.1e-10	0.148018	0.0255497	8.2e-10	-0.29381	0.0635858	3.8e-06	0.0485844	0.0225994	0.032	-0.00900797	0.00407734	0.027	-0.0398454	0.00975748	4.4e-05	NA	-0.119596	0.024876	1.55e-06
56	rs569258685	17:64315084			rs12940610	NA	PRKCA	PRKCA		1.9e-09	strain_circ	LVESV	A	AT	0.464967	-0.196014	0.0439017	3.7e-06	-0.00154839	0.000557587	0.0052	0.128845	0.0474978	0.0067	0.438402	0.0952126	4.1e-06	0.327198	0.0565025	2.9e-09	0.136738	0.0237392	1.9e-09	-0.223787	0.05908	0.00015	0.0109672	0.0209825	0.6	0.00243121	0.00378784	0.52	-0.0331922	0.00906595	0.00025	rs12940610-A**	-0.214122	0.022651	3.51e-21
57	rs497999	18:32672836	36598836		NA	NA	MAPRE2	MAPRE2		2.2e-08	LVconc	maxWT	G	A	0.304508	-0.122074	0.0464446	0.0049	-0.00329069	0.00059001	2.2e-08	-0.132992	0.0502529	0.0081	0.155055	0.100703	0.12	0.158331	0.0597557	0.0057	0.0795754	0.0251111	0.00084	-0.199416	0.0624968	0.0014	0.00426518	0.0221997	0.85	-0.0215398	0.00400992	7.8e-08	-0.0534479	0.00959241	2.5e-08	NA	-0.088517	0.024279	0.000269
58	rs501740	18:34244174	35479509, , 35697867, 36598836	LVEF,RVEF	NA	NA	KIAA1328	TPGS2	FHOD3	7.8e-09	strain_circ		G	T	0.265209	0.235448	0.0480641	8.7e-07	0.0012432	0.000610583	0.029	0.00578156	0.0520059	0.91	-0.155918	0.104215	0.13	-0.24745	0.0618401	4e-05	-0.1472	0.0259848	7.8e-09	0.335318	0.0646713	2.2e-07	-0.100513	0.022991	1.2e-05	0.00314846	0.00414968	0.45	0.0381534	0.0099317	0.00012	NA	0.257722	0.023483	5.46e-28
59	rs10871753	18:55956865	37126556		NA	NA	NEDD4L	NEDD4L		3.2e-11	strain_circ	LVEF,LVESV	G	T	0.48883	-0.228035	0.0425725	2.8e-08	-0.00106343	0.00054082	0.037	0.130196	0.0460625	0.0047	0.378365	0.0923052	4.1e-05	0.342365	0.0547728	3.2e-10	0.15267	0.0230241	3.2e-11	-0.213096	0.0573028	0.0002	0.0640586	0.0203608	0.0017	0.00385429	0.00367605	0.29	0.00116817	0.00879412	0.89	NA	-0.063363	0.022342	0.004582
60	rs12460541	19:46312077	33495596, , 35697867	RVESV,RVESV Indexed,LVESV,RA Max Indexed,RA Min,RA FAC,RA Min Indexed,LVEDV,RA Max,LVEDV Indexed,LVESV Indexed	NA	NA	RSPH6A	DMWD		9.9e-10	LVESV	LVEDV	G	A	0.653789	0.193708	0.0444364	8.9e-06	0.00202344	0.000564567	0.00021	-0.151318	0.0481009	0.0017	-0.526132	0.0963907	4.8e-08	-0.347045	0.0571885	9.9e-10	-0.0918795	0.0240446	0.00013	0.22334	0.0598177	0.00019	-0.0792779	0.0212512	0.00019	0.00177996	0.00383764	0.64	0.00954917	0.00918345	0.3	NA	0.149708	0.022861	6.01e-11
61	rs2070458	22:24159307	33495596, 29403010, 35278270, , 35697867, 36598836	LVESV Indexed,LVEF,LVESV	NA	NA	DERL3	SMARCB1		3.9e-19	LVconc	LVEF,LVEDV,LVESV,strain_circ,strain_rad,meanWT,maxWT	A	T	0.200216	0.323518	0.0533414	1.4e-09	0.0061283	0.000677803	3.9e-19	0.116204	0.0577775	0.044	-0.670249	0.115731	7e-09	-0.532775	0.0686594	6e-15	-0.212739	0.0288606	3e-13	0.452953	0.0717955	2.8e-10	-0.0284526	0.0255134	0.26	0.0328768	0.00460685	9.6e-13	0.0698619	0.0110232	2.3e-10	rs2186370-A(1.0)	0.262711	0.025899	3.79e-24
62	rs4820654	22:26162902	33495596, 36598836		NA	NA	MYO18B	MYO18B		3e-16	meanWT	LVconc	A	G	0.637102	-0.0437277	0.04427	0.26	-0.00438065	0.000562533	6.3e-15	-0.147788	0.0479513	0.0021	0.295619	0.096049	0.0021	0.13866	0.0569826	0.01	0.057544	0.0239509	0.011	-0.24	0.0595818	5.6e-05	-0.014239	0.0211852	0.5	-0.0312469	0.00382373	3e-16	-0.0363163	0.00914822	7.2e-05	NA	-0.045238	0.022435	0.043776
# SNP-trait pairs reaching nominal significance (P≤0.001) are marked in bold red font. ## In addition to the GWAS catalog query in November 2022, we also included recent GWAS of LV traits (PMIDs 35697867, 36598836, 36944631, 37126556). * Lookup in the HCM summary statistics was performed by either i) matching directly (using chr, pos, effect allele and noneffect allele) if the variant was not amb…
Abbreviations: b, regression coefficient; BSA, body surface area; EA, effect allele; EAF, effect allele frequency; GRCh37, genomic position using the human genome assembly 37 (hg19); HCM, hypertrophic cardiomyopathy; LV, left ventricle/ventricular; LVconc, LV concentricity; LVEDV, LV end-diastolic volume; LVEF, LV ejection fraction; LVESV, LV end-systolic volume; LVM, LV mass; maxWT, maximal LV w…
Reported statistical results for LV traits are from a quantitative trait GWAS using BOLT-LMM. Reported statistical results for HCM are from a fixed-effects meta-analysis combining up to 7 case-control GWAS. P values are not corrected for multiple testing.

## Sheet: ST7
Supplementary Table 7: Cross-trait genetic correlation results of left ventricular traits and HCM
Back to list
Trait 1	Trait 2	rg	rg_se	Z	P	h2_obs	h2_obs_se	h2_int	h2_int_se	gcov_int	gcov_int_se
HCM	LVconc	0.6303	0.058	10.8691	1.6187e-27	0.2327	0.0249	1.0193	0.0096	0.0005	0.0071
HCM	LVEDVi	-0.3505	0.0585	-5.9907	2.0899e-09	0.2253	0.0207	1.0127	0.0079	-0.0001	0.0057
HCM	LVEF	0.4885	0.0651	7.5067	6.065e-14	0.1828	0.0243	0.9867	0.0096	-0.0057	0.0071
HCM	LVESVi	-0.481	0.0612	-7.8538	4.0369e-15	0.2555	0.0246	0.9971	0.0085	0.0047	0.0069
HCM	LVMi	0.1668	0.0566	2.9461	0.0032	0.2413	0.0219	1.0141	0.0084	0.0017	0.0057
HCM	maxWT	0.5708	0.0582	9.7998	1.1276e-22	0.195	0.0197	1.0052	0.0081	0.0041	0.0066
HCM	meanWT	0.4527	0.0577	7.8506	4.1393e-15	0.2527	0.0248	1.0099	0.0094	5.5669e-05	0.0068
HCM	straincirc	-0.6191	0.0609	-10.1688	2.7331e-24	0.2243	0.0305	0.9987	0.0108	0.0066	0.008
HCM	strainlong	-0.2603	0.0901	-2.891	0.0038	0.1375	0.0297	0.987	0.0109	0.0064	0.0068
HCM	strainrad	0.5586	0.0617	9.0529	1.3927e-19	0.1809	0.0374	1.0018	0.0133	-0.007	0.0078
LVconc	LVEDVi	-0.5028	0.0383	-13.1198	2.5345e-39	0.2317	0.0215	1.0066	0.0073	-0.5367	0.0056
LVconc	LVEF	0.2945	0.0563	5.2329	1.6687e-07	0.1852	0.0239	0.983	0.0089	0.0208	0.005
LVconc	LVESVi	-0.4759	0.0401	-11.8628	1.8464e-32	0.2631	0.0268	0.9895	0.0086	-0.3845	0.0057
LVconc	LVMi	0.2959	0.0537	5.5043	3.7061e-08	0.2491	0.023	1.0073	0.0085	0.2339	0.0053
LVconc	maxWT	0.7151	0.0347	20.5825	3.9357e-94	0.192	0.0189	1.0032	0.0073	0.5558	0.0064
LVconc	meanWT	0.7827	0.0262	29.8912	2.5581e-196	0.2517	0.0232	1.0072	0.0088	0.7825	0.008
LVconc	straincirc	-0.384	0.056	-6.8615	6.813e-12	0.2216	0.0291	0.9984	0.0098	-0.1475	0.0057
LVconc	strainlong	0.0194	0.0782	0.2483	0.8039	0.1359	0.0287	0.9871	0.0096	0.1568	0.0047
LVconc	strainrad	0.3569	0.0619	5.7674	8.0528e-09	0.1808	0.0348	0.9993	0.0115	0.1181	0.006
LVEDVi	LVconc	-0.5028	0.0383	-13.1198	2.5345e-39	0.2307	0.0224	1.0174	0.0086	-0.5367	0.0056
LVEDVi	LVEF	-0.4803	0.0612	-7.8473	4.2513e-15	0.1852	0.0239	0.983	0.0089	-0.1093	0.0053
LVEDVi	LVESVi	0.8878	0.0163	54.4588	0	0.2631	0.0268	0.9895	0.0086	0.7787	0.0071
LVEDVi	LVMi	0.664	0.0367	18.0733	5.1749e-73	0.2491	0.023	1.0073	0.0085	0.673	0.0067
LVEDVi	maxWT	0.065	0.062	1.0479	0.2947	0.192	0.0189	1.0032	0.0073	0.0261	0.0051
LVEDVi	meanWT	0.0661	0.0552	1.1981	0.2309	0.2517	0.0232	1.0072	0.0088	-0.0207	0.0054
LVEDVi	straincirc	0.4577	0.057	8.0255	1.0115e-15	0.2216	0.0291	0.9984	0.0098	0.2172	0.0058
LVEDVi	strainlong	0.0981	0.0775	1.2655	0.2057	0.1359	0.0287	0.9871	0.0096	-0.0429	0.0052
LVEDVi	strainrad	-0.3085	0.0632	-4.8833	1.0435e-06	0.1808	0.0348	0.9993	0.0115	-0.1358	0.0054
LVEF	LVconc	0.2945	0.0563	5.2329	1.6687e-07	0.2307	0.0224	1.0174	0.0086	0.0208	0.005
LVEF	LVEDVi	-0.4803	0.0612	-7.8473	4.2513e-15	0.2317	0.0215	1.0066	0.0073	-0.1093	0.0053
LVEF	LVESVi	-0.8289	0.0239	-34.6542	3.8598e-263	0.2631	0.0268	0.9895	0.0086	-0.6743	0.0074
LVEF	LVMi	-0.2881	0.0684	-4.2104	2.5495e-05	0.2491	0.023	1.0073	0.0085	-0.1075	0.0056
LVEF	maxWT	0.1277	0.0628	2.0319	0.0422	0.192	0.0189	1.0032	0.0073	0.0074	0.005
LVEF	meanWT	0.0057	0.0709	0.08	0.9362	0.2517	0.0232	1.0072	0.0088	-0.1003	0.0055
LVEF	straincirc	-0.9325	0.018	-51.8184	0	0.2216	0.0291	0.9984	0.0098	-0.6747	0.0082
LVEF	strainlong	-0.5928	0.0726	-8.1616	3.305e-16	0.1359	0.0287	0.9871	0.0096	-0.3852	0.0075
LVEF	strainrad	0.8367	0.032	26.1241	1.942e-150	0.1808	0.0348	0.9993	0.0115	0.5733	0.0089
LVESVi	LVconc	-0.4759	0.0401	-11.8628	1.8464e-32	0.2307	0.0224	1.0174	0.0086	-0.3845	0.0057
LVESVi	LVEDVi	0.8878	0.0163	54.4588	0	0.2317	0.0215	1.0066	0.0073	0.7787	0.0071
LVESVi	LVEF	-0.8289	0.0239	-34.6542	3.8598e-263	0.1852	0.0239	0.983	0.0089	-0.6743	0.0074
LVESVi	LVMi	0.5736	0.0467	12.2772	1.2015e-34	0.2491	0.023	1.0073	0.0085	0.5514	0.007
LVESVi	maxWT	-0.0285	0.0624	-0.4566	0.648	0.192	0.0189	1.0032	0.0073	0.0221	0.0054
LVESVi	meanWT	0.0373	0.0604	0.6177	0.5368	0.2517	0.0232	1.0072	0.0088	0.0568	0.0057
LVESVi	straincirc	0.7748	0.0283	27.348	1.1392e-164	0.2216	0.0291	0.9984	0.0098	0.5627	0.0076
LVESVi	strainlong	0.3585	0.0714	5.0182	5.2163e-07	0.1359	0.0287	0.9871	0.0096	0.2106	0.0065
LVESVi	strainrad	-0.6357	0.0402	-15.8041	2.9141e-56	0.1808	0.0348	0.9993	0.0115	-0.4409	0.0075
LVMi	LVconc	0.2959	0.0537	5.5043	3.7061e-08	0.2307	0.0224	1.0174	0.0086	0.2339	0.0053
LVMi	LVEDVi	0.664	0.0367	18.0733	5.1749e-73	0.2317	0.0215	1.0066	0.0073	0.673	0.0067
LVMi	LVEF	-0.2881	0.0684	-4.2104	2.5495e-05	0.1852	0.0239	0.983	0.0089	-0.1075	0.0056
LVMi	LVESVi	0.5736	0.0467	12.2772	1.2015e-34	0.2631	0.0268	0.9895	0.0086	0.5514	0.007
LVMi	maxWT	0.6799	0.04	16.999	8.3499e-65	0.192	0.0189	1.0032	0.0073	0.5177	0.0058
LVMi	meanWT	0.7514	0.0218	34.5036	7.0805e-261	0.2517	0.0232	1.0072	0.0088	0.6656	0.0068
LVMi	straincirc	0.1685	0.0706	2.3856	0.0171	0.2216	0.0291	0.9984	0.0098	0.1225	0.0062
LVMi	strainlong	0.1311	0.0773	1.6955	0.09	0.1359	0.0287	0.9871	0.0096	0.0766	0.0049
LVMi	strainrad	-0.0207	0.0727	-0.2843	0.7762	0.1808	0.0348	0.9993	0.0115	-0.0536	0.0056
maxWT	LVconc	0.7151	0.0347	20.5825	3.9357e-94	0.2306	0.0224	1.0174	0.0086	0.5558	0.0064
maxWT	LVEDVi	0.065	0.062	1.0479	0.2947	0.2316	0.0215	1.0066	0.0073	0.0261	0.0051
maxWT	LVEF	0.1277	0.0628	2.0319	0.0422	0.1852	0.0239	0.983	0.0089	0.0074	0.005
maxWT	LVESVi	-0.0285	0.0624	-0.4566	0.648	0.2631	0.0268	0.9895	0.0086	0.0221	0.0054
maxWT	LVMi	0.6799	0.04	16.999	8.3499e-65	0.249	0.023	1.0074	0.0085	0.5177	0.0058
maxWT	meanWT	0.8577	0.0259	33.0912	3.9826e-240	0.2517	0.0232	1.0072	0.0088	0.6671	0.0069
maxWT	straincirc	-0.1791	0.0635	-2.8194	0.0048	0.2216	0.0291	0.9984	0.0098	0.0001	0.0055
maxWT	strainlong	0.1096	0.0804	1.3638	0.1726	0.1359	0.0286	0.987	0.0096	0.0763	0.0048
maxWT	strainrad	0.3086	0.0627	4.9222	8.5561e-07	0.1808	0.0348	0.9993	0.0115	0.0979	0.0058
meanWT	LVconc	0.7827	0.0262	29.8912	2.5581e-196	0.2306	0.0224	1.0174	0.0086	0.7825	0.008
meanWT	LVEDVi	0.0661	0.0552	1.1981	0.2309	0.2316	0.0215	1.0066	0.0073	-0.0207	0.0054
meanWT	LVEF	0.0057	0.0709	0.08	0.9362	0.1852	0.0239	0.983	0.0089	-0.1003	0.0055
meanWT	LVESVi	0.0373	0.0604	0.6177	0.5368	0.2631	0.0268	0.9895	0.0086	0.0568	0.0057
meanWT	LVMi	0.7514	0.0218	34.5036	7.0805e-261	0.249	0.023	1.0074	0.0085	0.6656	0.0068
meanWT	maxWT	0.8577	0.0259	33.0912	3.9826e-240	0.192	0.0189	1.0032	0.0073	0.6671	0.0069
meanWT	straincirc	-0.1164	0.0729	-1.5966	0.1104	0.2217	0.0291	0.9984	0.0098	-0.0172	0.0062
meanWT	strainlong	0.1242	0.0979	1.2683	0.2047	0.1359	0.0286	0.987	0.0096	0.1372	0.005
meanWT	strainrad	0.2613	0.0713	3.6663	0.0002	0.1808	0.0348	0.9993	0.0115	0.1068	0.0065
straincirc	LVconc	-0.384	0.056	-6.8615	6.813e-12	0.2306	0.0224	1.0174	0.0086	-0.1475	0.0057
straincirc	LVEDVi	0.4577	0.057	8.0255	1.0115e-15	0.2316	0.0215	1.0066	0.0073	0.2172	0.0058
straincirc	LVEF	-0.9325	0.018	-51.8184	0	0.1852	0.0239	0.983	0.0089	-0.6747	0.0082
straincirc	LVESVi	0.7748	0.0283	27.348	1.1392e-164	0.2631	0.0268	0.9895	0.0086	0.5627	0.0076
straincirc	LVMi	0.1685	0.0706	2.3856	0.0171	0.249	0.023	1.0074	0.0085	0.1225	0.0062
straincirc	maxWT	-0.1791	0.0635	-2.8194	0.0048	0.1919	0.0189	1.0032	0.0073	0.0001	0.0055
straincirc	meanWT	-0.1164	0.0729	-1.5966	0.1104	0.2517	0.0232	1.0072	0.0088	-0.0172	0.0062
straincirc	strainlong	0.6431	0.0653	9.8471	7.0571e-23	0.1359	0.0286	0.987	0.0096	0.4142	0.0081
straincirc	strainrad	-0.8562	0.0253	-33.8349	6.0512e-251	0.1809	0.0348	0.9992	0.0115	-0.69	0.0095
strainlong	LVconc	0.0194	0.0782	0.2483	0.8039	0.2306	0.0224	1.0174	0.0086	0.1568	0.0047
strainlong	LVEDVi	0.0981	0.0775	1.2655	0.2057	0.2316	0.0215	1.0066	0.0073	-0.0429	0.0052
strainlong	LVEF	-0.5928	0.0726	-8.1616	3.305e-16	0.1851	0.0239	0.983	0.0089	-0.3852	0.0075
strainlong	LVESVi	0.3585	0.0714	5.0182	5.2163e-07	0.2631	0.0268	0.9895	0.0086	0.2106	0.0065
strainlong	LVMi	0.1311	0.0773	1.6955	0.09	0.249	0.023	1.0074	0.0085	0.0766	0.0049
strainlong	maxWT	0.1096	0.0804	1.3638	0.1726	0.192	0.0189	1.0032	0.0073	0.0763	0.0048
strainlong	meanWT	0.1242	0.0979	1.2683	0.2047	0.2517	0.0232	1.0072	0.0088	0.1372	0.005
strainlong	straincirc	0.6431	0.0653	9.8471	7.0571e-23	0.2218	0.0291	0.9983	0.0098	0.4142	0.0081
strainlong	strainrad	-0.6204	0.0895	-6.9342	4.0853e-12	0.1809	0.0348	0.9992	0.0114	-0.3787	0.009
strainrad	LVconc	0.3569	0.0619	5.7674	8.0528e-09	0.2306	0.0224	1.0174	0.0086	0.1181	0.006
strainrad	LVEDVi	-0.3085	0.0632	-4.8833	1.0435e-06	0.2316	0.0215	1.0066	0.0073	-0.1358	0.0054
strainrad	LVEF	0.8367	0.032	26.1241	1.942e-150	0.1852	0.0239	0.983	0.0089	0.5733	0.0089
strainrad	LVESVi	-0.6357	0.0402	-15.8041	2.9141e-56	0.2631	0.0268	0.9895	0.0086	-0.4409	0.0075
strainrad	LVMi	-0.0207	0.0727	-0.2843	0.7762	0.249	0.023	1.0074	0.0085	-0.0536	0.0056
strainrad	maxWT	0.3086	0.0627	4.9222	8.5561e-07	0.1919	0.0189	1.0032	0.0073	0.0979	0.0058
strainrad	meanWT	0.2613	0.0713	3.6663	0.0002	0.2517	0.0232	1.0072	0.0088	0.1068	0.0065
strainrad	straincirc	-0.8562	0.0253	-33.8349	6.0512e-251	0.2217	0.0291	0.9983	0.0098	-0.69	0.0095
strainrad	strainlong	-0.6204	0.0895	-6.9342	4.0853e-12	0.1359	0.0286	0.987	0.0096	-0.3787	0.009
Abbreviations: gcov_int, cross-trait LD Score regression intercept; gcov_int_se, standard error of gcov_int; h2_int, single-trait LD Score regression intercept for trait 2; h2_int_se, standard error of h2_int; h2_obs, observed scale heritability estimate for trait 2; h2_obs_se, standard error of h2_obs; HCM, hypertrophic cardiomyopathy; LV, left ventricle/ventricular; LVconc, LV concentricity; LV…
Reported statistical results using LDSC genetic correlation. P values are not corrected for multiple testing.

## Sheet: ST8
Supplementary Table 8: Genome-wide significant loci in the HCM MTAG
Back to list
Locus Number	Locus Name*	Most severe consequence (VEP)##	Pubmed ID if previously published	meta_gws	mtag_novel	Lead SNP	GRCh37	EA	NEA	HCM MTAG				HCM GWAS#						HCMSARC+			HCMSARC-			oHCM			nHCM			straincirc			LVESVi			LVconc
										EAF	MTAG b	MTAG SE	MTAG P	b	SE	OR	95%CI	P	Het Q P	b	SE	P	b	SE	P	b	SE	P	b	SE	P	b	SE	P	b	SE	P	b	SE	P
1	FAAP20/SKI	3_prime_UTR_variant			1	rs2503715	1:2144107	G	A	0.871	0.297	0.037	1.08e-15	0.211117	0.043331	1.23506	1.13-1.34	1.12e-06	0.598569	0.165157	0.082106	0.04429	0.216393	0.052386	3.66e-05	0.2311	0.0928	0.01279	0.2121	0.0636	0.0008615	-0.205798	0.0358198	5.3e-09	-0.43069	0.0851804	2e-07	0.00521196	0.000841498	3.5e-10
2	RNF207	intron_variant			1	rs11121483	1:6263792	A	G	0.6	0.13	0.022	6.56e-09	0.106121	0.025309	1.11196	1.06-1.17	2.78e-05	0.161832	0.014215	0.044543	0.749636	0.158614	0.031316	4.16e-07	0.0663	0.0578	0.2513	0.1023	0.0391	0.00886	-0.100283	0.0238107	1.4e-05	-0.306211	0.0566066	4.9e-08	0.00190858	0.000559205	0.00068
3	HSPB7	3_prime_UTR_variant	33495596, 33495597	1	0	rs1048302	1:16340879	T	G	0.326	0.268	0.02	1.23e-39	0.253339	0.02233	1.28832	1.23-1.35	8.47e-30	0.59319	0.181612	0.038914	3.11e-06	0.293681	0.027861	6.02e-26	0.4085	0.0532	1.605e-14	0.2294	0.0355	1.095e-10	-0.207287	0.0242157	6.2e-19	-0.514222	0.0575835	1.4e-19	0.00213721	0.00056886	9.1e-05
4	DNAJB4/NEXN	intron_variant			1	rs6699769	1:78504264	A	G	0.794	0.134	0.025	4.42e-08	0.124618	0.027015	1.13272	1.07-1.19	4.03e-06	0.886866	0.080317	0.046963	0.087227	0.145128	0.033738	1.72e-05	0.0978	0.0652	0.1334	0.119	0.0438	0.006592	-0.0870264	0.0282504	0.0016	-0.144751	0.0671691	0.023	0.00136761	0.00066364	0.028
5	KYAT3/CCBL2	intron_variant			1	rs2810883	1:89332165	C	T	0.461	0.123	0.02	5.15e-10	0.103683	0.021743	1.10925	1.06-1.16	1.89e-06	0.904573	0.110163	0.038015	0.003769	0.09853	0.027043	0.000271	0.0491	0.0526	0.3511	0.1386	0.0348	6.748e-05	-0.0909964	0.0230778	0.00032	-0.166632	0.054858	0.0042	0.00184731	0.000542043	0.00087
6	PROX1	intergenic_variant			1	rs74139614	1:214285221	T	C	0.046	0.3	0.047	1.25e-10	0.262424	0.051379	1.30008	1.18-1.44	3.33e-07	0.852734	0.185575	0.08955	0.038256	0.29259	0.063817	4.61e-06	0.1493	0.1264	0.2376	0.3587	0.0787	5.152e-06	-0.187017	0.0550676	0.00065	-0.348438	0.13091	0.013	0.00460105	0.00129323	0.00027
7	LGALS8/ACTN2	intergenic_variant			1	rs547048	1:236801085	T	C	0.203	0.14	0.024	8.46e-09	0.137714	0.026677	1.14765	1.09-1.21	2.49e-07	0.643564	0.076153	0.047609	0.109691	0.17366	0.032947	1.39e-07	0.2259	0.064	0.0004139	0.0986	0.0431	0.02206	-0.117375	0.0291053	5.7e-05	-0.224807	0.0691955	0.00095	0.000492905	0.000683575	0.59
8	E2F6/ROCK2	downstream_gene_variant		1	0	rs11687178	2:11584197	C	A	0.651	0.136	0.021	1.41e-10	0.135328	0.023416	1.14491	1.09-1.20	7.7e-09	0.256627	0.123812	0.041293	0.002724	0.14249	0.029071	9.68e-07	0.1829	0.0564	0.001191	0.1003	0.0385	0.009256	-0.0481678	0.0240613	0.039	-0.10726	0.0572052	0.049	0.00146821	0.000564922	0.0074
9	STRN	intron_variant		1	0	rs3845778	2:37133127	T	C	0.481	0.167	0.02	2.9e-17	0.153235	0.021752	1.1656	1.12-1.22	1.93e-12	0.276093	0.108431	0.037976	0.004313	0.173385	0.027112	1.66e-10	0.1714	0.0523	0.001042	0.2039	0.035	5.507e-09	-0.0829577	0.0229648	0.00039	-0.151605	0.0546114	0.0046	0.00231996	0.000539273	8.1e-06
10	CEP68	regulatory_region_variant			1	rs1009358	2:65276452	T	C	0.614	0.135	0.02	1.09e-11	0.111309	0.021918	1.11774	1.07-1.17	3.88e-07	0.646107	0.06607	0.038235	0.083989	0.136335	0.027324	6.16e-07	0.1368	0.0529	0.009756	0.1295	0.035	0.0002125	-0.0939998	0.0235108	6.7e-05	-0.164665	0.0559004	0.0041	0.00241397	0.000552036	2.7e-05
11	TMEM182/MFSD9	intron_variant		1	0	rs2540277	2:103426177	C	T	0.937	0.313	0.044	1.41e-12	0.277734	0.049673	1.32013	1.20-1.46	2.31e-08	0.839735	0.281276	0.089134	0.001609	0.268578	0.061616	1.32e-05	0.3859	0.1214	0.00148	0.2825	0.0832	0.0006872	-0.254565	0.0462823	6e-08	-0.570651	0.110044	2e-07	0.00276165	0.00108665	0.017
12	CCDC141/SESTD1	intron_variant		1	0	rs6747402	2:179759434	G	A	0.524	0.123	0.02	5.76e-10	0.12876	0.021887	1.13742	1.09-1.19	4.14e-09	0.062399	0.076513	0.03849	0.046844	0.160132	0.02729	4.54e-09	0.1381	0.0523	0.008315	0.183	0.0357	3.007e-07	-0.0408305	0.0229393	0.075	-0.316051	0.0545478	6.9e-09	0.00116878	0.000538642	0.029
13	SPATS2L	intron_variant			1	rs295114	2:201195602	T	C	0.413	0.118	0.02	2.78e-09	0.095737	0.021825	1.10047	1.05-1.15	1.17e-05	0.95642	0.021921	0.038404	0.568165	0.125644	0.027136	3.71e-06	0.1341	0.0524	0.01043	0.0723	0.0351	0.03904	-0.0651546	0.0232241	0.0023	-0.227734	0.0552229	3.8e-05	0.00256899	0.000545337	2.3e-06
14	RAF1/TSEN2	intron_variant			1	rs1699340	3:12581416	T	C	0.625	0.122	0.022	2.18e-08	0.098057	0.024283	1.10303	1.05-1.16	5.44e-05	0.130146	0.130408	0.04298	0.002421	0.067486	0.030083	0.024896	0.1129	0.0565	0.04563	0.0489	0.0381	0.2003	-0.089565	0.0240157	0.00026	-0.207194	0.0570917	0.00032	0.00200762	0.00056468	0.0006
15	LSM3/SLC6A6	intergenic_variant	33495597	1	0	rs7612736	3:14276238	G	A	0.792	0.21	0.025	8.35e-17	0.198725	0.028029	1.21985	1.15-1.29	1.4e-12	0.813813	0.096247	0.048097	0.045396	0.25918	0.035486	2.92e-13	0.2261	0.0674	0.0007898	0.2622	0.0479	4.279e-08	-0.131823	0.0280539	1.2e-06	-0.369544	0.0666904	1.3e-08	0.00203529	0.000659626	0.00086
16	SEMA3G/SFMBT1	intron_variant			1	rs6796333	3:52359678	T	C	0.819	0.158	0.026	9.68e-10	0.153254	0.028535	1.16562	1.10-1.23	8.02e-08	0.846967	0.118974	0.050132	0.017656	0.177321	0.035437	5.73e-07	0.1566	0.0687	0.02264	0.1471	0.0455	0.001225	-0.055161	0.0297652	0.074	-0.146146	0.0707655	0.033	0.00206307	0.000699893	0.0056
17	MITF	intron_variant			1	rs79502300	3:69856753	T	C	0.192	0.167	0.025	1.67e-11	0.098922	0.027204	1.10398	1.05-1.16	0.000279	0.493051	-0.018031	0.048632	0.710828	0.159388	0.03354	2.05e-06	0.1047	0.0651	0.1079	0.1151	0.0434	0.008021	-0.157216	0.0290005	5.7e-08	-0.311315	0.0689548	1e-05	0.00505409	0.00068204	6e-13
18	FNDC3B	intron_variant	33495596 (MTAG)	1	0	rs4894803	3:171800256	G	A	0.406	0.183	0.021	2.59e-18	0.171397	0.023344	1.18696	1.13-1.24	2.19e-13	0.634449	0.128713	0.041413	0.001891	0.180884	0.02899	4.52e-10	0.2226	0.0555	6.087e-05	0.1392	0.0381	0.0002605	-0.0438557	0.0235109	0.045	-0.156271	0.0558996	0.0032	0.00315624	0.000552863	6.2e-09
19	PROM1	intron_variant			1	rs11730129	4:16032948	T	C	0.224	0.133	0.023	1.24e-08	0.108	0.025623	1.11405	1.06-1.17	2.53e-05	0.034383	0.067466	0.045189	0.13543	0.129468	0.03169	4.45e-05	0.2012	0.0607	0.0009113	0.0338	0.0408	0.4076	-0.155115	0.0276415	3.1e-08	-0.365128	0.0657643	3.2e-08	0.00144934	0.000648869	0.025
20	SLC1A3	intron_variant			1	rs75096272	5:36630209	A	G	0.035	0.282	0.05	1.64e-08	0.280525	0.054174	1.32382	1.19-1.47	2.29e-07	0.743009	0.276364	0.09803	0.004829	0.298201	0.066468	7.35e-06	0.3817	0.1236	0.002016	0.3132	0.087	0.000317	-0.0622805	0.0652134	0.25	0.0573507	0.155091	0.81	0.0038157	0.00153263	0.0092
21	ACTBL2	intergenic_variant	33495596 (MTAG)	1	0	rs2191446	5:57011404	A	G	0.795	0.226	0.026	1.29e-18	0.213718	0.028603	1.23827	1.17-1.31	8.25e-14	0.3734	0.171432	0.049616	0.000553	0.236853	0.035757	3.62e-11	0.2323	0.0709	0.00106	0.1654	0.0464	0.0003692	-0.147285	0.0285757	5.4e-07	-0.337692	0.0679843	1.3e-06	0.002072	0.000671849	0.0018
22	PROB1/SPATA24	missense_variant	33495596 (MTAG)	1	0	rs11748963	5:138730037	C	T	0.286	0.174	0.022	1.55e-15	0.156665	0.024028	1.1696	1.12-1.23	7.26e-11	0.241578	0.147667	0.0424	0.0005	0.154061	0.029755	2.29e-07	0.1306	0.0575	0.02321	0.1404	0.0384	0.0002528	-0.172268	0.0257358	6.4e-11	-0.36272	0.0612374	3.3e-09	0.00123577	0.000605164	0.062
23	GMPR	intron_variant			1	rs6914805	6:16281187	C	T	0.73	0.134	0.022	1.3e-09	0.132483	0.024289	1.14166	1.09-1.20	5.02e-08	0.190315	0.10124	0.042237	0.016553	0.142885	0.030347	2.54e-06	0.098	0.0583	0.09288	0.1454	0.0384	0.0001513	-0.0854164	0.025812	0.001	-0.12279	0.0614206	0.041	0.000816566	0.000605912	0.21
24	CDKN1A	intron_variant	33495596 (MTAG), 33495597	1	0	rs3176326	6:36647289	A	G	0.212	0.336	0.024	9.49e-45	0.266883	0.026266	1.30589	1.24-1.37	3.18e-24	0.143018	0.186197	0.046123	5.47e-05	0.300655	0.032536	2.6e-20	0.387	0.0601	1.227e-10	0.2492	0.0401	5.203e-10	-0.254676	0.0289191	4.5e-20	-0.392763	0.0688194	7.4e-09	0.00648064	0.000678942	1.1e-21
25	MLIP	intron_variant			1	rs816379	6:53999025	A	C	0.628	0.131	0.021	1.07e-09	0.120791	0.023938	1.12839	1.08-1.18	4.6e-07	0.509336	0.114872	0.042792	0.007281	0.13441	0.029714	6.17e-06	0.217	0.0573	0.0001525	0.1433	0.0399	0.0003279	-0.0777969	0.0237423	0.0017	-0.242612	0.0564926	1.7e-05	0.00156767	0.000557317	0.0037
26	SLC35F1/PLN	intergenic_variant	33495596, 33495597	1	0	rs12210733	6:118653075	A	G	0.055	0.438	0.04	6.3e-28	0.41799	0.043331	1.51891	1.40-1.65	5.42e-22	0.330832	0.303371	0.076906	8.07e-05	0.476951	0.053763	7.65e-19	0.5407	0.0989	4.647e-08	0.3923	0.0679	7.528e-09	-0.133997	0.0503781	0.0084	-0.537435	0.119921	6.4e-06	0.00705364	0.00118305	3.1e-09
27	HEY2	intergenic_variant			1	rs1159974	6:126090277	C	T	0.507	0.114	0.02	2.66e-08	0.097094	0.022665	1.10196	1.05-1.15	1.86e-05	0.60398	0.003616	0.039974	0.927911	0.135501	0.028294	1.7e-06	0.1127	0.0557	0.04284	0.0743	0.0387	0.0547	-0.0245223	0.0230446	0.21	-0.0854125	0.0548263	0.074	0.0026142	0.000540941	9.8e-07
28	NUP43/PCMT1	intron_variant			1	rs2184370	6:150164378	A	G	0.357	0.125	0.02	1.12e-09	0.104976	0.022481	1.11068	1.06-1.16	3.07e-06	0.683316	0.102061	0.039241	0.009317	0.095402	0.027974	0.000653	0.1623	0.0542	0.002745	0.1193	0.0359	0.0008946	-0.0877551	0.0240341	0.00052	-0.19161	0.0571815	0.00087	0.00202363	0.000564094	0.00028
29	CCDC136/FLNC	intron_variant	33495596 (MTAG)	1	0	rs66520020	7:128438284	T	C	0.162	0.214	0.027	2.84e-15	0.195474	0.029834	1.21589	1.15-1.29	5.87e-11	0.957979	0.241729	0.052148	3.62e-06	0.165191	0.037021	8.23e-06	0.2883	0.0704	4.225e-05	0.1301	0.0488	0.007691	-0.195152	0.0321448	4.2e-10	-0.522938	0.0764413	2.8e-12	0.00173237	0.000754857	0.033
30	ERI1	TF_binding_site_variant			1	rs2945236	8:8168394	A	G	0.521	0.111	0.02	1.88e-08	0.101087	0.021829	1.10637	1.06-1.15	3.7e-06	0.305209	0.061022	0.038139	0.109601	0.125203	0.027273	4.48e-06	0.1158	0.0524	0.02701	0.0788	0.0353	0.02542	-0.0984322	0.0230511	1.3e-05	-0.149202	0.0548228	0.0052	0.000849227	0.000541642	0.18
31	FAM167A/FDFT1	upstream_gene_variant			1	rs12216858	8:11783118	C	T	0.596	0.114	0.02	1.39e-08	0.07223	0.022169	1.0749	1.03-1.12	0.001127	0.775833	0.100415	0.038888	0.009837	0.062245	0.027592	0.0241	0.0269	0.0529	0.6107	0.0534	0.0354	0.1316	-0.148981	0.0233069	4.4e-11	-0.331019	0.055425	1e-09	0.00234984	0.000547596	2.5e-05
32	XPO7	intron_variant		1	0	rs7824244	8:21802432	A	G	0.138	0.217	0.029	2.86e-14	0.199332	0.031445	1.22059	1.15-1.30	2.39e-10	0.336088	0.282704	0.054796	2.53e-07	0.165715	0.039426	2.66e-05	0.1958	0.0758	0.00976	0.2038	0.0503	5.035e-05	-0.065261	0.0356875	0.12	-0.175393	0.0848634	0.073	0.00420116	0.000838448	9e-07
33	FBXO32	intron_variant			1	rs7835298	8:124552303	A	G	0.437	0.123	0.02	8.6e-10	0.102951	0.022112	1.10844	1.06-1.16	3.28e-06	0.316417	0.068882	0.03903	0.077594	0.100236	0.027429	0.00026	0.1632	0.0533	0.002206	0.0584	0.0359	0.1036	-0.10801	0.0230923	2.3e-06	-0.231469	0.0549108	1.6e-05	0.00160119	0.000542514	0.0022
34	MTSS1	intron_variant		1	0	rs35006907	8:125859817	A	C	0.309	0.187	0.021	1.65e-18	0.151511	0.02339	1.16359	1.11-1.22	9.63e-11	0.881831	0.129531	0.041154	0.001654	0.151087	0.029034	1.99e-07	0.1991	0.056	0.0003793	0.1347	0.0378	0.000359	-0.170201	0.024779	1.3e-11	-0.475344	0.0589262	3.4e-16	0.00284347	0.000582195	4e-07
35	RAPGEF1	intron_variant			1	rs13297385	9:134544226	T	C	0.278	0.118	0.022	4.91e-08	0.12439	0.023833	1.13246	1.08-1.19	1.83e-07	0.130602	0.128937	0.041908	0.002102	0.123098	0.029573	3.18e-05	0.2319	0.0564	3.946e-05	0.1407	0.038	0.0002154	-0.0122688	0.0253409	0.45	0.0273464	0.0603221	0.63	0.00125915	0.000595197	0.037
36	KLF6/AKR1E2	intron_variant		1	0	rs2645210	10:4098453	A	G	0.189	0.153	0.025	1.66e-09	0.153164	0.027859	1.16552	1.10-1.23	3.94e-08	0.519471	0.133278	0.050026	0.007735	0.15157	0.034368	1.05e-05	0.1961	0.0681	0.003982	0.1388	0.045	0.002037	-0.0678612	0.030439	0.026	-0.0564817	0.0724161	0.45	0.00133092	0.000715328	0.045
37	SVIL	intron_variant			1	rs2182400	10:29707551	A	G	0.761	0.134	0.023	1.12e-08	0.115187	0.02589	1.12208	1.07-1.18	8.74e-06	0.960722	0.077206	0.045668	0.090913	0.150221	0.031977	2.67e-06	0.0233	0.062	0.7077	0.1403	0.0417	0.000762	-0.108802	0.0268367	6.4e-05	-0.210045	0.0638467	0.0017	0.00163499	0.000630685	0.012
38	MYOZ1/SYNPO2L	intron_variant	33495596 (MTAG)	1	0	rs2177843	10:75409877	T	C	0.159	0.25	0.027	2.53e-20	0.235499	0.029789	1.26554	1.19-1.34	2.8e-15	0.908508	0.124431	0.054063	0.02138	0.303671	0.036743	1.47e-16	0.3004	0.0725	3.418e-05	0.1703	0.0501	0.0006781	-0.108688	0.0321715	0.00079	0.012877	0.0765298	0.77	0.00321786	0.000755977	1.9e-05
39	VTI1A/TCF7L2	intron_variant	33495596 (MTAG)	1	0	rs11196085	10:114505037	C	T	0.277	0.219	0.022	7.7e-24	0.202898	0.023844	1.22495	1.17-1.28	1.85e-17	0.752077	0.199273	0.041601	1.7e-06	0.204673	0.029724	5.96e-12	0.2302	0.0566	4.832e-05	0.189	0.0381	6.921e-07	-0.114557	0.0261691	1.9e-05	-0.114625	0.0622565	0.063	0.00283792	0.00061497	5e-06
40	BAG3	intron_variant	33495596, 33495597	1	0	rs17617337	10:121426884	T	C	0.21	0.401	0.023	2.56e-67	0.373425	0.025248	1.4527	1.38-1.53	1.87e-49	0.345302	0.270494	0.044807	1.62e-09	0.404458	0.031226	2.49e-38	0.4817	0.0598	8.103e-16	0.3547	0.0399	6.558e-19	-0.344127	0.0279384	3.4e-35	-0.81636	0.0664623	5.1e-35	0.00302269	0.000656574	5.1e-06
41	COPB1/RRAS2	intron_variant		1	0	rs12270374	11:14375079	C	T	0.361	0.158	0.021	1.7e-14	0.139628	0.022615	1.14985	1.10-1.20	6.85e-10	0.916564	0.137049	0.039244	0.000482	0.143924	0.028289	3.7e-07	0.2027	0.054	0.0001732	0.0992	0.0365	0.006505	-0.0603289	0.0241186	0.018	-0.157165	0.0573342	0.0088	0.00295352	0.000566192	1.6e-07
42	MYBPC3	intergenic_variant	33495597	1	0	rs182427065	11:57752909	A	G	0.013	0.975	0.088	2.27e-28	1.23081	0.096347	3.42402	2.83-4.14	2.48e-37	3.71e-14	NA**	NA**	2.34e-11	0.238043	0.197491	0.228053	0.7517	0.2714	0.005606	0.8394	0.1535	4.538e-08	0.0743087	0.107499	0.52	0.0961081	0.255523	0.74	-0.00265383	0.00252327	0.23
43	PGR	intron_variant			1	rs11571171	11:100974887	A	G	0.692	0.12	0.022	3.42e-08	0.099419	0.024009	1.10453	1.05-1.16	3.5e-05	0.345078	0.1418	0.042325	0.000812	0.080656	0.029894	0.00699	0.1427	0.0575	0.01297	0.0921	0.0397	0.02048	-0.0817781	0.0246972	0.00068	-0.206843	0.0587195	0.00032	0.00202149	0.000579858	0.00029
44	PDE3A	intron_variant			1	rs10841524	12:20589183	G	A	0.376	0.124	0.021	2.76e-09	0.118057	0.022999	1.12531	1.08-1.18	2.91e-07	0.714618	0.101764	0.040512	0.012028	0.125486	0.028571	1.14e-05	0.0998	0.0556	0.07251	0.1527	0.0376	4.905e-05	-0.0296074	0.0237275	0.29	-0.0249312	0.0564517	0.7	0.00190182	0.000557278	0.00082
45	SSPN	5_prime_UTR_variant			1	rs58747679	12:26348304	T	C	0.71	0.134	0.022	1.29e-09	0.118238	0.024414	1.12551	1.07-1.18	1.3e-06	0.321962	0.027844	0.042421	0.511608	0.168923	0.030563	3.33e-08	0.0473	0.0587	0.4202	0.1301	0.0398	0.001068	-0.11121	0.0251462	4.9e-06	-0.188185	0.0598154	0.00092	0.00134892	0.000590464	0.025
46	TBX3	intergenic_variant	33495597	1	0	rs7487962	12:115361930	G	A	0.741	0.184	0.023	1.71e-15	0.204108	0.02555	1.22643	1.17-1.29	1.43e-15	0.290449	0.18046	0.04451	5.08e-05	0.226073	0.031912	1.46e-12	0.2743	0.0631	1.387e-05	0.2066	0.041	4.735e-07	-0.0759096	0.0258911	0.0028	-0.202817	0.0616086	0.0013	0.000395035	0.000608166	0.55
47	PXN	intron_variant			1	rs116904997	12:120668534	G	A	0.978	0.45	0.074	1.2e-09	0.234532	0.083421	1.26432	1.07-1.49	0.004946	0.810716	-0.026112	0.141863	0.85395	0.369971	0.106522	0.000518	0.2952	0.2126	0.1649	0.2887	0.1403	0.03958	-0.447614	0.0778536	1.4e-08	-0.877571	0.185343	4.1e-06	0.0118954	0.0018296	2e-11
48	COL4A2	intron_variant			1	rs9515201	13:111040798	C	A	0.697	0.128	0.022	4.64e-09	0.102507	0.024131	1.10795	1.06-1.16	2.18e-05	0.88901	0.031837	0.042067	0.449168	0.131117	0.030207	1.44e-05	0.072	0.0583	0.2167	0.1294	0.0395	0.00106	-0.0769762	0.0253355	0.0015	-0.226149	0.0602665	9.2e-05	0.00270495	0.000595141	1.3e-05
49	ADPRHL1	missense_variant	33495597	1	0	rs41306688	13:114078558	C	A	0.033	0.466	0.054	8.85e-18	0.470896	0.059642	1.60143	1.42-1.80	3.04e-15	0.219965	0.179366	0.161696	0.26729	0.533804	0.073724	4.65e-13	0.1592	0.1976	0.4204	0.5089	0.0967	1.437e-07	-0.131447	0.0632349	0.032	-0.237841	0.150407	0.086	0.00507873	0.0014853	0.00026
50	FERMT2/ERO1A	intergenic_variant		1	0	rs113907726	14:53316867	G	T	0.187	0.162	0.025	1.06e-10	0.151981	0.02768	1.16414	1.10-1.23	4.1e-08	0.274346	0.149252	0.048045	0.001901	0.137081	0.034638	7.65e-05	0.1723	0.0659	0.008875	0.1036	0.0447	0.02038	-0.142217	0.0294789	9.5e-07	-0.278206	0.0701236	5.3e-05	0.00101249	0.00069233	0.17
51	SIPA1L1	intron_variant			1	rs8019721	14:71834210	A	G	0.252	0.135	0.022	1.76e-09	0.105424	0.024717	1.11118	1.06-1.17	2.02e-05	0.983382	0.036847	0.043137	0.393006	0.143659	0.03086	3.29e-06	0.1963	0.0584	0.0007767	0.0608	0.0399	0.1279	-0.0896037	0.0263753	0.00051	-0.0775052	0.0627501	0.17	0.00281048	0.000619531	8.3e-06
52	PTPN21	intron_variant			1	rs140763915	14:88974767	T	C	0.017	0.405	0.072	1.92e-08	0.380319	0.078622	1.46275	1.25-1.71	1.34e-06	0.757084	0.379464	0.137159	0.005679	0.412281	0.097347	2.31e-05	0.3909	0.1997	0.05023	0.4026	0.1252	0.001308	-0.252873	0.0892715	0.0039	-0.581064	0.21242	0.0048	0.00460668	0.00209729	0.031
53	GSC	intergenic_variant		1	0	rs8006225	14:95219657	G	T	0.825	0.191	0.027	2.76e-12	0.202823	0.030406	1.22486	1.15-1.30	2.64e-11	0.15312	0.17265	0.054669	0.001595	0.212824	0.037618	1.57e-08	0.2504	0.0755	0.000909	0.1825	0.0514	0.0003874	-0.0134505	0.0299921	0.74	0.0117319	0.0713332	0.92	0.0021164	0.000704276	0.0022
54	ADAMTS7/MORF4L1	intron_variant			1	rs2002854	15:79053014	A	G	0.262	0.14	0.022	2.8e-10	0.128988	0.02436	1.13768	1.08-1.19	1.22e-07	0.291013	0.078255	0.042857	0.067871	0.15357	0.030217	3.8e-07	0.033	0.0586	0.5726	0.1837	0.038	1.304e-06	-0.0699605	0.0265976	0.0051	-0.162782	0.0632948	0.0083	0.00202051	0.000624635	0.00073
55	ALPK3/NMB	intron_variant	33495596 (MTAG), 33495597	1	0	rs8033459	15:85253258	T	C	0.461	0.236	0.02	3.51e-33	0.186794	0.021669	1.20538	1.16-1.26	7.04e-18	0.661455	0.224013	0.03799	3.81e-09	0.18102	0.026915	1.81e-11	0.1186	0.0525	0.02383	0.2012	0.0346	5.78e-09	-0.131332	0.0229709	1.6e-08	-0.287506	0.0546525	1.8e-07	0.00529297	0.000539344	5.8e-22
56	LMF1	intron_variant			1	rs4984741	16:1025464	A	G	0.263	0.124	0.022	1.77e-08	0.093128	0.024271	1.0976	1.05-1.15	0.000126	0.680907	0.090062	0.042292	0.033233	0.096009	0.030172	0.001469	0.0621	0.058	0.2842	0.0429	0.0379	0.2574	-0.106729	0.0261272	2.4e-05	-0.235937	0.0621344	0.00013	0.00259816	0.000613812	2.2e-05
57	MLST8/TSC2	non_coding_transcript_exon_variant	33495596		0	rs11860560	16:2238931	A	G	0.073	0.218	0.038	1.28e-08	0.206174	0.042322	1.22897	1.13-1.34	1.13e-06	0.836665	0.134264	0.076511	0.079294	0.224854	0.051716	1.39e-05	0.2182	0.1014	0.03137	0.15	0.0656	0.02215	-0.078573	0.0437855	0.059	-0.176352	0.104072	0.078	0.00310345	0.00102813	0.0046
58	SRL	intron_variant			1	rs28575249	16:4266062	G	A	0.495	0.122	0.02	7.98e-10	0.101843	0.021825	1.10721	1.06-1.16	3.11e-06	0.097662	0.105782	0.038105	0.005517	0.098574	0.027223	0.000296	0.0811	0.0523	0.1208	0.1197	0.035	0.0006198	-0.058202	0.0229326	0.013	-0.153852	0.0545334	0.0052	0.00247795	0.000538704	3.4e-06
59	PLEKHM1/MAPT	downstream_gene_variant	33495596, 33495597	1	0	rs28768976	17:43688317	G	A	0.234	0.249	0.023	1.68e-27	0.235627	0.025136	1.2657	1.20-1.33	7.43e-21	0.878414	0.16339	0.044351	0.000231	0.276949	0.031164	6.66e-19	0.2043	0.061	0.0008087	0.2566	0.0397	1.054e-10	-0.0161751	0.0275343	0.44	-0.0384668	0.0655382	0.5	0.00497998	0.000646753	3e-15
60	HLF	intron_variant			1	rs17817857	17:53376942	T	C	0.264	0.164	0.023	6.4e-13	0.128774	0.025297	1.13743	1.08-1.20	3.64e-07	0.499232	0.102905	0.045029	0.022316	0.127223	0.031414	5.18e-05	0.1964	0.0601	0.001076	0.0925	0.0429	0.03118	-0.146625	0.0258995	1.5e-09	-0.361763	0.0616484	1e-09	0.00268375	0.000608366	1e-05
61	PRKCA	intron_variant	33495596 (MTAG), 33495597	1	0	rs7210446	17:64307014	A	G	0.574	0.217	0.02	2.84e-26	0.213714	0.022634	1.23827	1.18-1.29	3.88e-21	0.984389	0.174469	0.039987	1.3e-05	0.252475	0.028256	4.31e-19	0.2468	0.0554	8.344e-06	0.1978	0.0379	1.849e-07	-0.133446	0.0232329	3.1e-09	-0.316304	0.0552978	4.2e-09	0.00156179	0.000545702	0.004
62	MAPRE2	intron_variant			1	rs497999	18:32672836	A	G	0.7	0.126	0.022	1.06e-08	0.088517	0.024279	1.09255	1.04-1.15	0.000269	0.012046	0.057325	0.042556	0.17795	0.097784	0.030216	0.001217	0.0465	0.0581	0.4244	0.0344	0.0399	0.3885	-0.0795754	0.0251111	0.00084	-0.158331	0.0597557	0.0057	0.00329069	0.00059001	2.2e-08
63	FHOD3/TPGS2	intron_variant	23255317, 33495596, 33495597	1	0	rs2644262	18:34223566	C	T	0.288	0.31	0.022	1.59e-46	0.328603	0.023756	1.38903	1.33-1.46	1.79e-43	0.433479	0.197834	0.042384	3.1e-06	0.381918	0.029406	1.58e-38	0.216	0.0575	0.0001711	0.3509	0.038	2.609e-20	-0.14068	0.0258803	2.8e-08	-0.270028	0.0615904	5e-06	0.00139156	0.000608123	0.016
64	NEDD4L	intron_variant		1	0	rs6566955	18:55922789	G	A	0.305	0.131	0.022	1.15e-09	0.132091	0.0238	1.14121	1.09-1.20	2.93e-08	0.155173	0.081173	0.042201	0.054433	0.140543	0.02934	1.7e-06	0.0845	0.0577	0.1428	0.1196	0.0367	0.00112	-0.0496974	0.0247922	0.054	-0.225454	0.0589784	0.00015	0.00139622	0.000582346	0.023
65	DMPK/SYMPK	intron_variant		1	0	rs12460541	19:46312077	G	A	0.662	0.161	0.021	1.03e-14	0.149708	0.022861	1.1615	1.11-1.21	6.01e-11	0.129761	0.171562	0.039772	1.63e-05	0.132257	0.028535	3.63e-06	0.2511	0.0546	4.275e-06	0.1514	0.0366	3.481e-05	-0.0918795	0.0240446	0.00013	-0.347045	0.0571885	9.9e-10	0.00202344	0.000564567	0.00021
66	CCT8	intron_variant		1	0	rs62222424	21:30530131	G	A	0.934	0.272	0.041	4.48e-11	0.278657	0.045808	1.32135	1.21-1.45	1.21e-09	0.69485	0.384006	0.085127	6.55e-06	0.251606	0.056244	7.8e-06	0.4735	0.1147	3.691e-05	0.2337	0.0766	0.002273	-0.154744	0.0488962	0.001	-0.441746	0.116389	0.00014	0.00175018	0.00114945	0.11
67	VPREB3/SMARCB1	intron_variant	33495596 (MTAG), 33495597	1	0	rs5760054	22:24161717	C	T	0.222	0.321	0.024	4.59e-42	0.267608	0.025949	1.30683	1.24-1.38	6.62e-25	0.121922	0.117963	0.046852	0.011829	0.322434	0.031962	6.69e-24	0.3324	0.0604	3.661e-08	0.2788	0.0406	6.925e-12	-0.212147	0.0288141	3.2e-13	-0.532435	0.0685488	5.6e-15	0.00608335	0.000676713	6.3e-19
68	ADSL	3_prime_UTR_variant			1	rs139920	22:40726749	T	C	0.514	0.122	0.021	4.11e-09	0.112856	0.023139	1.11947	1.07-1.17	1.09e-06	0.324015	0.085057	0.04066	0.036466	0.133243	0.028911	4.11e-06	0.1134	0.0564	0.04446	0.1367	0.039	0.0004508	-0.0556089	0.0230216	0.0098	-0.107399	0.0547701	0.037	0.00166251	0.000540683	0.0016
# SNP-trait pairs reaching nominal significance (P≤0.001) are marked in bold font, and those reaching GWAS significance (P≤5x10-8) are also marked in red. ## See Supplementary Table 11 for detailed output for variant effect predictor (VEP) *Locus naming was performed as for Table 1, primarily using OpenTargets gene prioritisation taking into account FUMA analysis, and prior rare variant associati…
Abbreviations: 95%CI, 95% confidence interval of the odds ratio; b, regression coefficient; EA, effect allele; EAF, effect allele frequency in the HCM case-control meta-analysis; HCMSARC-, case-control GWAS stratified for sarcomere-negative hypertrophic cardiomyopathy; HCMSARC+, case-control GWAS stratified for sarcomere-positive hypertrophic cardiomyopathy Het Q P, Heterogeneity Cochrane's Q tes…
Reported statistical results for LV traits are from a quantitative trait GWAS using BOLT-LMM. Reported statistical results for HCM are from a fixed-effects meta-analysis combining up to 7 case-control GWASor from MTAG combining HCM with LV traits. P values are not corrected for multiple testing.

## Sheet: ST9
Supplementary Table 9: MAGMA gene set enrichment analyses
Back to list
FULL_NAME	NGENES	BETA	BETA_STD	SE	P
GO_cc:go_i_band	130	0.46126	0.038289	0.079514	3.3553e-09
GO_bp:go_muscle_structure_development	591	0.2079	0.036339	0.038352	3.0059e-08
GO_bp:go_muscle_tissue_development	370	0.24038	0.033446	0.048197	3.0889e-07
GO_bp:go_sarcomere_organization	47	0.63184	0.031607	0.12753	3.6593e-07
GO_cc:go_contractile_fiber	220	0.30129	0.032457	0.061338	4.55e-07
GO_bp:go_muscle_cell_development	166	0.34309	0.032152	0.070613	5.9586e-07
GO_bp:go_muscle_cell_differentiation	328	0.24208	0.031749	0.050629	8.7756e-07
GO_bp:go_nucleobase_containing_small_molecule_interconversion	27	0.80214	0.030429	0.16978	1.1618e-06
GO_bp:go_cardiac_muscle_tissue_development	202	0.2949	0.030456	0.064735	2.6312e-06
GO_bp:go_cardiac_muscle_tissue_regeneration	4	2.218	0.032405	0.51158	7.3089e-06
GO_bp:go_tricuspid_valve_development	6	1.8684	0.03343	0.43176	7.5883e-06
GO_bp:go_striated_muscle_cell_differentiation	255	0.24155	0.027989	0.056989	1.1304e-05
GO_bp:go_muscle_organ_morphogenesis	84	0.45792	0.030594	0.10945	1.44e-05
GO_bp:go_tricuspid_valve_morphogenesis	5	1.9635	0.032073	0.46964	1.4588e-05
GO_mf:go_atpase_inhibitor_activity	5	1.9011	0.031053	0.46452	2.1434e-05
GO_bp:go_positive_regulation_of_fc_receptor_mediated_stimulatory_signaling_pathway	7	1.4663	0.028338	0.35984	2.3124e-05
GO_bp:go_cardiac_muscle_cell_differentiation	111	0.34171	0.026224	0.084876	2.8492e-05
GO_bp:go_cardiac_muscle_tissue_morphogenesis	67	0.48061	0.02869	0.12013	3.1702e-05
GO_bp:go_vesicle_fusion_with_golgi_apparatus	6	1.4965	0.026777	0.37713	3.6351e-05
GO_cc:go_nucleoplasm_part	1021	0.10569	0.023991	0.026686	3.7564e-05
GO_bp:go_regulation_of_cardiac_muscle_tissue_regeneration	2	2.7555	0.028468	0.71087	5.3249e-05
GO_bp:go_myofibril_assembly	68	0.41886	0.025189	0.10889	6.0064e-05
GO_cc:go_sarcoplasmic_reticulum_lumen	8	1.0492	0.021676	0.27355	6.2879e-05
GO_bp:go_negative_regulation_of_vasoconstriction	7	1.5746	0.03043	0.41063	6.3127e-05
GO_bp:go_positive_regulation_of_fc_gamma_receptor_signaling_pathway_involved_in_phagocytosis	5	1.591	0.025987	0.41537	6.4241e-05
GO_bp:go_atrioventricular_valve_formation	7	1.5121	0.029224	0.39614	6.7726e-05
GO_mf:go_structural_constituent_of_muscle	42	0.53226	0.025173	0.14082	7.8771e-05
GO_bp:go_epithelial_cell_maturation	15	1.0242	0.028967	0.27226	8.4653e-05
GO_mf:go_titin_binding	14	0.88459	0.024172	0.23525	8.5187e-05
GO_bp:go_glial_cell_fate_commitment	14	0.93159	0.025457	0.2503	9.9171e-05
GO_bp:go_actomyosin_structure_organization	183	0.25178	0.024762	0.06829	0.00011385
GO_bp:go_cardiocyte_differentiation	139	0.28344	0.024323	0.077684	0.00013224
GO_mf:go_muscle_alpha_actinin_binding	16	0.80939	0.023643	0.22644	0.00017602
GO_bp:go_regulation_of_fc_receptor_mediated_stimulatory_signaling_pathway	11	0.99658	0.024141	0.27991	0.00018566
GO_bp:go_cardiac_cell_development	80	0.36678	0.023916	0.10311	0.0001879
GO_bp:go_acylglycerol_transport	4	2.0382	0.029779	0.57422	0.00019345
GO_bp:go_muscle_system_process	423	0.16029	0.023811	0.046228	0.00026352
GO_bp:go_cellular_component_assembly_involved_in_morphogenesis	108	0.29762	0.022532	0.085866	0.00026464
GO_bp:go_regulation_of_cardiac_vascular_smooth_muscle_cell_differentiation	3	1.8837	0.023835	0.54355	0.00026518
GO_cc:go_supramolecular_complex	877	0.11306	0.023882	0.03279	0.0002831
GO_mf:go_map_kinase_kinase_kinase_activity	25	0.65025	0.023737	0.18925	0.00029596
GO_cc:go_actin_cytoskeleton	476	0.14635	0.023029	0.042607	0.00029709
GO_bp:go_dorsal_aorta_development	9	1.1274	0.024704	0.32923	0.00030885
GO_bp:go_cardiac_ventricle_morphogenesis	70	0.39298	0.023976	0.11488	0.00031283
GO_mf:go_actinin_binding	38	0.50517	0.022728	0.14993	0.00037755
GO_bp:go_muscle_hypertrophy	85	0.35591	0.023919	0.10615	0.00040085
GO_bp:go_regulation_of_fc_gamma_receptor_signaling_pathway_involved_in_phagocytosis	7	1.2815	0.024767	0.38301	0.0004109
GO_bp:go_pirna_biosynthetic_process	5	1.4945	0.024411	0.45082	0.0004592
GO_bp:go_transcription_elongation_from_rna_polymerase_ii_promoter	81	0.2944	0.019316	0.089106	0.00047763
GO_bp:go_regulation_of_heart_rate	92	0.34198	0.023905	0.10388	0.0004985
GO_mf:go_lactate_transmembrane_transporter_activity	6	1.1627	0.020803	0.35403	0.00051263
GO_bp:go_muscle_organ_development	371	0.15689	0.021858	0.047926	0.00053206
GO_mf:go_ankyrin_binding	20	0.7337	0.023959	0.2248	0.00055079
GO_mf:go_nucleobase_transmembrane_transporter_activity	6	1.0972	0.019631	0.3376	0.0005784
GO_mf:go_adenyl_nucleotide_exchange_factor_activity	9	0.87011	0.019066	0.26982	0.00063161
GO_bp:go_lactate_transport	7	1.0803	0.020878	0.33686	0.00067183
GO_bp:go_regulation_of_heart_rate_by_chemical_signal	6	1.1648	0.020841	0.36376	0.00068371
GO_cc:go_transferase_complex_transferring_phosphorus_containing_groups	234	0.17993	0.019982	0.056383	0.00070984
GO_cc:go_junctional_membrane_complex	7	1.2988	0.0251	0.40833	0.00073604
GO_cc:go_cytoskeletal_part	1547	0.076361	0.021017	0.024076	0.00075916
GO_bp:go_cardiac_chamber_morphogenesis	125	0.27304	0.022228	0.086159	0.00076613
GO_bp:go_intra_golgi_vesicle_mediated_transport	31	0.4778	0.01942	0.15136	0.00079944
GO_mf:go_adenyl_nucleotide_binding	1457	0.074777	0.020026	0.023885	0.00087333
GO_cc:go_protein_kinase_complex	98	0.28028	0.020218	0.089638	0.00088495
GO_bp:go_ventricular_cardiac_muscle_tissue_development	53	0.41806	0.022204	0.13387	0.00089704
GO_bp:go_heart_morphogenesis	244	0.19173	0.021737	0.061491	0.00091207
GO_mf:go_actin_binding	394	0.14378	0.020631	0.046183	0.00092645
GO_bp:go_mitochondrial_respiratory_chain_complex_iii_assembly	9	0.73107	0.01602	0.23555	0.00095733
GO_mf:go_alpha_actinin_binding	31	0.50971	0.020717	0.1648	0.00099272
GO_bp:go_positive_regulation_of_heart_growth	37	0.474	0.021044	0.15382	0.0010314
GO_cc:go_a_band	39	0.39035	0.017791	0.12708	0.0010662
GO_bp:go_peptide_hormone_secretion	237	0.18369	0.020529	0.059982	0.0010997
GO_mf:go_cytoskeletal_protein_binding	902	0.093981	0.020119	0.030707	0.0011061
GO_bp:go_muscle_hypertrophy_in_response_to_stress	23	0.64752	0.022674	0.21196	0.0011272
GO_bp:go_morphogenesis_of_embryonic_epithelium	145	0.23665	0.020738	0.077532	0.0011374
GO_bp:go_regulation_of_cardiac_muscle_cell_membrane_potential	7	1.0088	0.019497	0.33105	0.0011559
GO_bp:go_tube_formation	141	0.24272	0.020977	0.079815	0.0011806
GO_cc:go_junctional_sarcoplasmic_reticulum_membrane	9	1.0955	0.024005	0.36045	0.0011875
GO_bp:go_heart_valve_formation	12	0.8836	0.022355	0.29127	0.0012101
GO_mf:go_lbd_domain_binding	5	1.5982	0.026106	0.52707	0.0012152
GO_bp:go_negative_regulation_of_cell_population_proliferation	640	0.11145	0.020244	0.036851	0.0012476
GO_bp:go_heart_development	524	0.12531	0.020662	0.041587	0.0012942
GO_bp:go_adenylate_cyclase_activating_adrenergic_receptor_signaling_pathway_involved_in_heart_process	7	1.0701	0.02068	0.35514	0.0012948
GO_cc:go_ada2_gcn5_ada3_transcription_activator_complex	14	0.58306	0.015933	0.1964	0.0014971
GO_bp:go_cardiac_ventricle_development	122	0.25618	0.020606	0.086921	0.001605
GO_mf:go_filamin_binding	13	0.76599	0.02017	0.25992	0.0016067
GO_bp:go_golgi_to_vacuole_transport	14	0.73667	0.02013	0.25016	0.0016184
GO_bp:go_regulation_of_muscle_system_process	223	0.1897	0.020573	0.064709	0.0016886
GO_bp:go_regulation_of_protein_localization_to_synapse	22	0.56074	0.019204	0.19455	0.0019763
GO_mf:go_atpase_regulator_activity	40	0.3699	0.017074	0.12847	0.0019951
GO_bp:go_tissue_morphogenesis	633	0.10694	0.019322	0.037389	0.0021195
GO_bp:go_negative_regulation_of_high_voltage_gated_calcium_channel_activity	5	1.1511	0.018802	0.40249	0.0021213
GO_bp:go_plasma_membrane_tubulation	22	0.48513	0.016614	0.17069	0.0022437
GO_cc:go_rna_polymerase_ii_holoenzyme	74	0.27346	0.017152	0.096464	0.0022949
GO_bp:go_glandular_epithelial_cell_differentiation	47	0.39342	0.01968	0.13906	0.0023365
GO_cc:go_histone_deacetylase_complex	64	0.29066	0.016959	0.10283	0.0023539
GO_bp:go_circulatory_system_development	997	0.085403	0.01917	0.030286	0.0024044
GO_cc:go_unconventional_myosin_complex	10	0.891	0.02058	0.31601	0.0024074
GO_bp:go_sympathetic_ganglion_development	9	0.91698	0.020093	0.32719	0.0025377
GO_bp:go_response_to_topologically_incorrect_protein	188	0.17184	0.017127	0.061384	0.0025632
GO_cc:go_platelet_dense_granule	20	0.52665	0.017198	0.18829	0.0025814
GO_cc:go_m_band	28	0.39411	0.015224	0.14201	0.0027612
GO_bp:go_heart_growth	83	0.28257	0.018766	0.10182	0.0027624
GO_bp:go_muscle_adaptation	107	0.25475	0.019197	0.092566	0.0029642
GO_mf:go_cell_adhesive_protein_binding_involved_in_bundle_of_his_cell_purkinje_myocyte_communication	5	1.2957	0.021165	0.4712	0.0029845
GO_bp:go_negative_regulation_of_synaptic_vesicle_exocytosis	4	1.3635	0.019922	0.49749	0.0030675
GO_cc:go_golgi_transport_complex	12	0.78804	0.019938	0.28863	0.0031676
GO_bp:go_parasympathetic_nervous_system_development	18	0.63166	0.01957	0.23191	0.0032305
GO_bp:go_negative_regulation_of_vascular_smooth_muscle_cell_differentiation	8	1.0742	0.022193	0.39581	0.0033271
GO_bp:go_negative_regulation_of_developmental_process	875	0.086087	0.018165	0.031745	0.0033492
GO_cc:go_actomyosin	70	0.3195	0.019493	0.1179	0.0033675
GO_bp:go_regulation_of_branching_involved_in_prostate_gland_morphogenesis	7	1.1165	0.021577	0.41255	0.0034056
GO_bp:go_smooth_muscle_cell_differentiation	55	0.33784	0.018278	0.12496	0.0034322
GO_bp:go_glial_cell_proliferation	45	0.36515	0.017874	0.13542	0.0035073
GO_bp:go_negative_regulation_of_blood_circulation	32	0.46499	0.019201	0.17303	0.003605
GO_mf:go_ribonucleotide_binding	1780	0.058542	0.017166	0.021807	0.003635
GO_bp:go_hormone_transport	303	0.14318	0.018061	0.053589	0.0037755
GO_bp:go_dna_templated_transcription_elongation	106	0.21222	0.015918	0.079438	0.0037792
GO_mf:go_transferase_activity_transferring_phosphorus_containing_groups	861	0.080964	0.016953	0.030344	0.0038167
GO_bp:go_actin_filament_based_process	697	0.094203	0.017829	0.035363	0.0038659
GO_cc:go_transferase_complex	725	0.085924	0.016572	0.032358	0.0039642
GO_bp:go_positive_regulation_of_transcription_elongation_from_rna_polymerase_ii_promoter	18	0.57626	0.017853	0.21709	0.0039749
GO_bp:go_regionalization	329	0.14843	0.019496	0.056015	0.0040309
GO_cc:go_transcription_factor_tfiih_holo_complex	11	0.59911	0.014513	0.22648	0.0040849
GO_bp:go_negative_regulation_of_multicellular_organismal_process	1114	0.074535	0.017626	0.028212	0.0041254
GO_cc:go_cardiac_myofibril	7	0.85394	0.016503	0.32566	0.0043721
GO_bp:go_positive_regulation_of_stem_cell_population_maintenance	8	0.91169	0.018835	0.34803	0.0044057
GO_bp:go_chaperone_mediated_autophagy	15	0.5152	0.014572	0.19753	0.0045553
GO_cc:go_platelet_dense_granule_lumen	14	0.56444	0.015424	0.21646	0.0045635
GO_bp:go_regulation_of_meiotic_nuclear_division	30	0.4123	0.016485	0.15892	0.0047428
GO_bp:go_response_to_retinoic_acid	106	0.24092	0.01807	0.092945	0.0047741
GO_bp:go_cardiac_chamber_development	163	0.19212	0.017842	0.074263	0.0048446
GO_cc:go_cell_cortex_region	40	0.3837	0.01771	0.14914	0.0050505
GO_mf:go_gtp_dependent_protein_binding	22	0.49215	0.016855	0.19135	0.0050604
GO_bp:go_regulation_of_actomyosin_structure_organization	85	0.26416	0.017753	0.10299	0.0051645
GO_bp:go_nucleobase_containing_small_molecule_metabolic_process	335	0.12759	0.016908	0.049776	0.005189
GO_bp:go_negative_regulation_of_tyrosine_phosphorylation_of_stat_protein	11	0.79423	0.019239	0.30996	0.0052028
GO_cc:go_basal_part_of_cell	52	0.32321	0.017004	0.12636	0.0052704
GO_bp:go_dendrite_arborization	5	1.2314	0.020114	0.48197	0.0053154
GO_bp:go_positive_regulation_of_organ_growth	46	0.3533	0.017485	0.13839	0.0053446
GO_bp:go_insulin_secretion	198	0.16594	0.016968	0.065381	0.0055793
GO_bp:go_aorta_morphogenesis	30	0.45909	0.018356	0.18089	0.0055798
GO_bp:go_regulation_of_cell_communication_by_electrical_coupling	12	0.77357	0.019572	0.305	0.0056052
GO_bp:go_natural_killer_cell_activation	81	0.27167	0.017825	0.10766	0.0058166
GO_bp:go_neural_crest_cell_migration_involved_in_autonomic_nervous_system_development	6	0.95434	0.017076	0.37826	0.0058228
GO_bp:go_negative_regulation_of_schwann_cell_proliferation	6	0.88485	0.015833	0.35232	0.0060155
GO_cc:go_sarcolemma	135	0.20856	0.01764	0.08307	0.0060293
GO_bp:go_atrioventricular_valve_development	24	0.51851	0.018546	0.20659	0.0060429
GO_mf:go_chloride_channel_inhibitor_activity	9	0.71648	0.0157	0.28607	0.0061344
GO_bp:go_body_morphogenesis	47	0.33564	0.01679	0.13422	0.0062016
GO_bp:go_neural_tube_development	154	0.1848	0.016685	0.074361	0.0064801
GO_bp:go_regulation_of_neurotransmitter_receptor_localization_to_postsynaptic_specialization_membrane	7	0.88658	0.017134	0.35735	0.0065563
GO_bp:go_columnar_cuboidal_epithelial_cell_maturation	7	0.92203	0.017819	0.37174	0.0065683
GO_cc:go_rna_polymerase_complex	100	0.20251	0.014756	0.081694	0.0065942
GO_bp:go_schwann_cell_proliferation	8	0.68346	0.01412	0.27607	0.0066542
GO_mf:go_kinase_activity	718	0.083672	0.016063	0.033826	0.006693
GO_bp:go_respiratory_system_development	189	0.1742	0.017408	0.070581	0.0067967
GO_bp:go_dorsal_ventral_axis_specification	10	0.79606	0.018387	0.32264	0.0068116
GO_cc:go_h4_histone_acetyltransferase_complex	38	0.31047	0.013968	0.12597	0.0068634
GO_bp:go_cardiac_myofibril_assembly	26	0.44967	0.01674	0.18265	0.0069143
GO_cc:go_nuclear_speck	370	0.10561	0.014694	0.042921	0.0069411
GO_bp:go_chromosome_organization	1077	0.066313	0.015436	0.027009	0.0070444
GO_bp:go_anatomical_structure_formation_involved_in_morphogenesis	1035	0.072379	0.016535	0.029523	0.0071158
GO_bp:go_regulation_of_fear_response	6	0.85715	0.015337	0.34985	0.007147
GO_bp:go_lung_alveolus_development	40	0.3863	0.01783	0.15788	0.0072127
GO_bp:go_positive_regulation_of_mesenchymal_cell_proliferation	26	0.46424	0.017282	0.18988	0.0072497
GO_bp:go_pre_b_cell_differentiation	4	1.3478	0.019691	0.55163	0.0072834
GO_bp:go_branching_involved_in_prostate_gland_morphogenesis	12	0.69157	0.017497	0.28329	0.0073239
GO_cc:go_nuclear_body	707	0.078097	0.014882	0.031996	0.0073317
GO_bp:go_retina_vasculature_morphogenesis_in_camera_type_eye	10	0.79043	0.018257	0.32455	0.0074417
GO_bp:go_cardiac_vascular_smooth_muscle_cell_differentiation	8	0.78808	0.016282	0.32376	0.0074677
GO_bp:go_neuronal_stem_cell_population_maintenance	22	0.47568	0.016291	0.19548	0.0074845
GO_bp:go_muscle_contraction	335	0.1252	0.016591	0.051563	0.0075941
GO_mf:go_helicase_activity	140	0.16639	0.01433	0.068881	0.0078596
GO_bp:go_intrinsic_apoptotic_signaling_pathway_in_response_to_oxidative_stress	41	0.31378	0.014663	0.12998	0.0078919
GO_bp:go_regulation_of_organ_growth	86	0.23784	0.016077	0.098533	0.0078981
GO_bp:go_nucleotide_excision_repair_preincision_complex_assembly	26	0.37111	0.013815	0.15379	0.007914
GO_bp:go_nephron_tubule_formation	18	0.59403	0.018404	0.24621	0.0079221
GO_mf:go_cyclin_dependent_protein_serine_threonine_kinase_inhibitor_activity	12	0.62776	0.015883	0.26099	0.0080847
GO_bp:go_pulmonary_artery_morphogenesis	6	0.96961	0.017349	0.40352	0.0081386
GO_bp:go_negative_regulation_of_smooth_muscle_cell_differentiation	14	0.65057	0.017778	0.27111	0.0082097
GO_bp:go_regulation_of_cell_population_proliferation	1493	0.058672	0.015889	0.024471	0.0082555
GO_cc:go_basal_plasma_membrane	34	0.37964	0.016158	0.15835	0.0082602
GO_bp:go_regulation_of_the_force_of_heart_contraction	27	0.47334	0.017956	0.19773	0.0083423
GO_bp:go_skeletal_muscle_satellite_cell_activation	6	1.0987	0.019658	0.45934	0.0083872
GO_cc:go_actin_filament_bundle	64	0.29548	0.01724	0.12407	0.0086258
GO_bp:go_contractile_actin_filament_bundle_assembly	89	0.2397	0.016482	0.10075	0.0086837
GO_bp:go_regulation_of_receptor_localization_to_synapse	14	0.59543	0.016271	0.25059	0.0087526
GO_bp:go_regulation_of_vascular_smooth_muscle_cell_differentiation	14	0.62537	0.017089	0.26326	0.0087685
GO_bp:go_skeletal_muscle_organ_development	162	0.17056	0.015791	0.071815	0.0087808
GO_bp:go_nucleobase_transport	8	0.65841	0.013603	0.2779	0.008918
GO_bp:go_regulation_of_myoblast_differentiation	52	0.31921	0.016794	0.13478	0.0089389
GO_bp:go_negative_regulation_of_skeletal_muscle_tissue_development	12	0.65183	0.016491	0.2753	0.0089559
GO_bp:go_desmosome_organization	10	0.79391	0.018337	0.33532	0.0089571
GO_bp:go_vascular_smooth_muscle_cell_differentiation	25	0.44813	0.016359	0.18928	0.00896
GO_mf:go_chromatin_binding	492	0.094167	0.015058	0.03981	0.0090104
GO_cc:go_cyclin_dependent_protein_kinase_holoenzyme_complex	39	0.32956	0.015021	0.1394	0.0090434
GO_cc:go_neurofibrillary_tangle	5	1.1893	0.019427	0.50332	0.0090703
GO_mf:go_hsp70_protein_binding	41	0.3061	0.014304	0.1296	0.0090995
GO_mf:go_protein_carboxyl_o_methyltransferase_activity	7	0.71994	0.013914	0.30495	0.0091224
GO_mf:go_double_stranded_methylated_dna_binding	4	0.94849	0.013858	0.40197	0.0091531
GO_bp:go_regulation_of_developmental_growth	299	0.12652	0.015855	0.053721	0.0092636
GO_mf:go_dna_dependent_atpase_activity	81	0.21268	0.013954	0.090348	0.0092928
GO_mf:go_satellite_dna_binding	8	0.90533	0.018704	0.38473	0.0093132
GO_bp:go_morphogenesis_of_a_branching_structure	189	0.16548	0.016537	0.070397	0.0093753
GO_bp:go_adp_biosynthetic_process	5	0.92697	0.015141	0.39444	0.0093898
GO_bp:go_regulation_of_heart_growth	61	0.28019	0.015962	0.11924	0.0093993
GO_mf:go_protein_phosphatase_2a_binding	30	0.40006	0.015996	0.17028	0.0094078
GO_cc:go_serine_threonine_protein_kinase_complex	79	0.23383	0.015152	0.099782	0.0095608
GO_bp:go_trigeminal_nerve_morphogenesis	4	1.0275	0.015012	0.43912	0.0096489
GO_bp:go_cytoskeleton_organization	1219	0.062123	0.015322	0.026578	0.009716
GO_bp:go_negative_regulation_of_vascular_permeability	11	0.59699	0.014461	0.25552	0.0097421
GO_bp:go_negative_regulation_of_developmental_growth	96	0.22112	0.015788	0.094737	0.0098017
GO_bp:go_negative_regulation_of_cytosolic_calcium_ion_concentration	11	0.68561	0.016608	0.29424	0.0099061
GO_bp:go_regulation_of_actin_filament_bundle_assembly	87	0.2384	0.016208	0.10236	0.0099336
GO_mf:go_histone_methyltransferase_activity_h3_k9_specific_	8	0.77146	0.015938	0.33206	0.010088
GO_bp:go_striated_muscle_contraction	157	0.1745	0.015907	0.07514	0.010112
GO_bp:go_snrna_transcription	71	0.21209	0.013032	0.091346	0.010126
GO_bp:go_negative_regulation_of_vasculature_development	111	0.20592	0.015803	0.088842	0.010235
GO_bp:go_neural_plate_pattern_specification	7	0.87374	0.016886	0.37697	0.010235
GO_bp:go_regulation_of_muscle_adaptation	82	0.24277	0.016026	0.10479	0.010268
GO_bp:go_midbrain_hindbrain_boundary_development	8	0.80544	0.01664	0.34786	0.010301
GO_bp:go_mesendoderm_development	4	1.3688	0.019998	0.59231	0.010424
GO_bp:go_cell_communication_by_electrical_coupling	29	0.41904	0.016474	0.18136	0.010436
GO_mf:go_channel_inhibitor_activity	37	0.31763	0.014102	0.13767	0.010528
GO_bp:go_positive_regulation_of_cardiac_muscle_cell_proliferation	25	0.44196	0.016134	0.19158	0.010535
GO_bp:go_negative_regulation_of_vascular_smooth_muscle_cell_proliferation	17	0.52958	0.015945	0.22959	0.010543
GO_mf:go_nerve_growth_factor_binding	5	1.0016	0.016361	0.43428	0.01055
GO_bp:go_melanocyte_differentiation	23	0.47298	0.016562	0.20518	0.010583
GO_mf:go_calcium_channel_regulator_activity	46	0.31592	0.015635	0.13717	0.010641
GO_bp:go_transmembrane_receptor_protein_tyrosine_kinase_signaling_pathway	669	0.082394	0.015289	0.035782	0.010654
GO_bp:go_nucleoside_metabolic_process	46	0.30894	0.01529	0.13462	0.010877
GO_bp:go_negative_regulation_of_endothelial_cell_proliferation	35	0.35958	0.015527	0.15674	0.010898
GO_bp:go_regulation_of_voltage_gated_calcium_channel_activity	34	0.36882	0.015698	0.16079	0.010907
GO_bp:go_labyrinthine_layer_blood_vessel_development	19	0.50549	0.016089	0.22068	0.010999
GO_bp:go_nucleoside_triphosphate_metabolic_process	57	0.27028	0.014886	0.11817	0.011096
GO_bp:go_facial_nerve_structural_organization	8	0.79559	0.016437	0.34901	0.011324
GO_bp:go_inner_cell_mass_cell_proliferation	13	0.52657	0.013866	0.23115	0.011369
GO_cc:go_cell_cortex_part	168	0.1578	0.014876	0.069319	0.011415
GO_mf:go_e_box_binding	48	0.32845	0.016604	0.14435	0.011449
GO_bp:go_prostate_glandular_acinus_development	11	0.63659	0.015421	0.27989	0.011475
GO_bp:go_atp_metabolic_process	43	0.31405	0.015028	0.13813	0.011501
GO_mf:go_tbp_class_protein_binding	21	0.36224	0.012121	0.15944	0.01155
GO_bp:go_physiological_cardiac_muscle_hypertrophy	24	0.41255	0.014756	0.18177	0.011622
GO_bp:go_negative_regulation_of_calcium_ion_transmembrane_transport	36	0.34542	0.015127	0.15233	0.011682
GO_mf:go_amp_activated_protein_kinase_activity	7	0.70512	0.013627	0.31103	0.011699
GO_bp:go_natural_killer_cell_differentiation	22	0.42452	0.014539	0.18729	0.011713
GO_bp:go_regulation_of_muscle_contraction	152	0.17743	0.015917	0.078599	0.011996
GO_bp:go_positive_regulation_of_triglyceride_lipase_activity	10	0.66178	0.015285	0.29347	0.012073
GO_mf:go_11_cis_retinal_binding	5	0.86535	0.014135	0.38476	0.012262
GO_bp:go_mammary_gland_branching_involved_in_pregnancy	5	1.0537	0.017212	0.46861	0.012274
GO_bp:go_negative_regulation_of_response_to_wounding	84	0.22699	0.015165	0.10103	0.012333
GO_mf:go_rna_polymerase_ii_ctd_heptapeptide_repeat_kinase_activity	16	0.46346	0.013538	0.2063	0.012339
GO_bp:go_vitamin_transmembrane_transport	16	0.48718	0.014231	0.21717	0.012444
GO_bp:go_regulation_of_anatomical_structure_morphogenesis	992	0.066888	0.014978	0.029847	0.012519
GO_mf:go_drug_binding	1624	0.05122	0.014412	0.022862	0.012539
GO_bp:go_regulation_of_mesenchymal_cell_proliferation	34	0.38075	0.016205	0.17028	0.012679
GO_bp:go_regulation_of_calcium_ion_transmembrane_transporter_activity	81	0.23691	0.015544	0.10597	0.012696
GO_bp:go_erad_pathway	90	0.19978	0.013814	0.08958	0.012873
GO_bp:go_skeletal_muscle_cell_differentiation	66	0.24602	0.014576	0.11035	0.012898
GO_bp:go_cell_fate_commitment	242	0.13916	0.015714	0.062428	0.012909
GO_bp:go_metanephric_nephron_tubule_morphogenesis	8	0.73802	0.015247	0.33142	0.012985
GO_bp:go_neurotrophin_signaling_pathway	37	0.31954	0.014186	0.14357	0.013027
GO_bp:go_neural_plate_regionalization	5	0.95594	0.015615	0.43162	0.013394
GO_cc:go_protein_acetyltransferase_complex	83	0.19662	0.013058	0.088824	0.013434
GO_bp:go_negative_regulation_of_cellular_protein_localization	106	0.1885	0.014138	0.085231	0.013504
GO_bp:go_response_to_growth_factor	666	0.080846	0.01497	0.036565	0.013524
GO_bp:go_cranial_nerve_structural_organization	10	0.70328	0.016244	0.31811	0.013531
GO_bp:go_metanephric_tubule_formation	6	0.89404	0.015997	0.40599	0.013836
GO_cc:go_carboxy_terminal_domain_protein_kinase_complex	19	0.42812	0.013627	0.19452	0.013879
GO_bp:go_tube_morphogenesis	781	0.075853	0.015161	0.034495	0.013947
GO_bp:go_regulation_of_transcription_elongation_from_rna_polymerase_ii_promoter	28	0.3801	0.014683	0.17296	0.013993
GO_bp:go_pigment_cell_differentiation	33	0.37525	0.015735	0.17093	0.014075
GO_bp:go_regulation_of_muscle_cell_differentiation	144	0.16368	0.014294	0.07458	0.014102
GO_bp:go_regulation_of_axon_guidance	41	0.31453	0.014698	0.14343	0.014165
GO_bp:go_response_to_endoplasmic_reticulum_stress	263	0.11505	0.013535	0.052474	0.014178
GO_bp:go_t_cell_antigen_processing_and_presentation	4	0.93706	0.013691	0.42741	0.014183
GO_bp:go_branchiomotor_neuron_axon_guidance	5	0.89294	0.014586	0.4077	0.014261
GO_bp:go_histone_mrna_catabolic_process	12	0.64069	0.01621	0.29287	0.014356
GO_bp:go_negative_regulation_of_cell_differentiation	656	0.080732	0.01484	0.036947	0.014449
GO_bp:go_glucan_metabolic_process	67	0.23961	0.014304	0.11017	0.014826
GO_bp:go_regulation_of_membrane_repolarization	30	0.40607	0.016236	0.18673	0.014834
GO_mf:go_purine_ntp_dependent_helicase_activity	73	0.19528	0.012166	0.089946	0.014968
GO_mf:go_frizzled_binding	37	0.30569	0.013571	0.14082	0.014979
GO_bp:go_purine_nucleoside_diphosphate_biosynthetic_process	6	0.77398	0.013849	0.35665	0.015005
GO_bp:go_regulation_of_hormone_secretion	252	0.12619	0.014536	0.058162	0.015027
GO_bp:go_negative_regulation_of_calcium_ion_transport	56	0.26125	0.014262	0.12042	0.015028
GO_bp:go_dichotomous_subdivision_of_terminal_units_involved_in_salivary_gland_branching	5	1.0235	0.016718	0.47225	0.015114
GO_mf:go_protein_prenyltransferase_activity	6	0.9341	0.016714	0.43142	0.015193
GO_bp:go_negative_regulation_of_mrna_processing	27	0.32803	0.012444	0.15151	0.015198
GO_bp:go_striated_muscle_adaptation	48	0.29164	0.014743	0.13473	0.015213
GO_bp:go_mitotic_cell_cycle_arrest	14	0.55724	0.015227	0.25853	0.01557
GO_mf:go_diphosphoinositol_polyphosphate_diphosphatase_activity	2	1.868	0.019299	0.86934	0.015836
GO_bp:go_protein_de_adp_ribosylation	5	1.0454	0.017076	0.48821	0.016133
GO_bp:go_positive_regulation_of_sister_chromatid_cohesion	10	0.66547	0.015371	0.31119	0.016246
GO_cc:go_cortical_actin_cytoskeleton	80	0.20542	0.013394	0.096075	0.016262
GO_mf:go_purine_nucleobase_transmembrane_transporter_activity	4	1.088	0.015896	0.50906	0.016295
GO_mf:go_camp_dependent_protein_kinase_activity	6	0.73352	0.013125	0.34346	0.016359
GO_bp:go_head_morphogenesis	35	0.32512	0.014039	0.15238	0.016445
GO_bp:go_glucose_6_phosphate_metabolic_process	10	0.56311	0.013006	0.264	0.016468
GO_bp:go_negative_regulation_of_vascular_endothelial_growth_factor_receptor_signaling_pathway	12	0.49022	0.012403	0.23023	0.016624
GO_bp:go_retina_vasculature_development_in_camera_type_eye	17	0.51412	0.01548	0.24156	0.016663
GO_bp:go_supramolecular_fiber_organization	613	0.07839	0.013946	0.036863	0.016736
GO_bp:go_regulation_of_gastric_motility	5	0.77444	0.01265	0.36455	0.016827
GO_bp:go_cellular_response_to_topologically_incorrect_protein	150	0.14453	0.01288	0.068051	0.016851
GO_mf:go_myosin_heavy_chain_binding	12	0.50415	0.012755	0.2374	0.016859
GO_bp:go_rap_protein_signal_transduction	13	0.52078	0.013713	0.24549	0.016954
GO_bp:go_aorta_smooth_muscle_tissue_morphogenesis	3	1.3394	0.016948	0.63229	0.017079
GO_bp:go_maintenance_of_animal_organ_identity	5	0.94342	0.01541	0.44583	0.017176
GO_bp:go_regulation_of_insulin_secretion	168	0.14938	0.014082	0.070597	0.017185
GO_bp:go_cellular_metabolic_compound_salvage	33	0.34309	0.014386	0.16223	0.017227
GO_bp:go_neural_tube_patterning	38	0.3294	0.01482	0.15582	0.017269
GO_cc:go_catalytic_complex	1280	0.051855	0.013083	0.024562	0.017387
GO_bp:go_rna_polymerase_ii_preinitiation_complex_assembly	24	0.33777	0.012082	0.16007	0.017432
GO_bp:go_positive_regulation_of_actin_filament_bundle_assembly	60	0.25823	0.01459	0.1224	0.017448
GO_bp:go_establishment_of_planar_polarity_involved_in_neural_tube_closure	15	0.45578	0.012891	0.21612	0.017484
GO_bp:go_nadp_metabolic_process	11	0.56612	0.013714	0.2685	0.017503
GO_bp:go_response_to_stimulus_involved_in_regulation_of_muscle_adaptation	15	0.50057	0.014158	0.23762	0.017584
GO_mf:go_channel_regulator_activity	136	0.16609	0.0141	0.078851	0.017592
GO_bp:go_negative_regulation_of_rna_splicing	23	0.3451	0.012084	0.16387	0.017615
GO_bp:go_positive_regulation_of_mitotic_sister_chromatid_separation	9	0.60283	0.013209	0.28631	0.01763
GO_bp:go_regulation_of_lipoprotein_lipase_activity	21	0.43809	0.014659	0.20812	0.017653
GO_bp:go_positive_regulation_of_stress_fiber_assembly	52	0.27349	0.014388	0.12996	0.017678
GO_bp:go_cardiac_septum_morphogenesis	72	0.24872	0.015389	0.11835	0.017801
GO_bp:go_c21_steroid_hormone_biosynthetic_process	26	0.36595	0.013623	0.1746	0.018051
GO_bp:go_regulation_of_epithelial_tube_formation	18	0.44893	0.013908	0.21422	0.018065
GO_bp:go_positive_regulation_of_synaptic_vesicle_transport	11	0.6509	0.015767	0.3107	0.018095
GO_bp:go_regulation_of_vascular_endothelial_growth_factor_receptor_signaling_pathway	32	0.33728	0.013928	0.16123	0.018231
GO_bp:go_steroid_hormone_secretion	20	0.41549	0.013568	0.19889	0.01836
GO_bp:go_adenohypophysis_development	14	0.52429	0.014327	0.25102	0.018377
GO_bp:go_positive_regulation_of_chromosome_separation	11	0.55609	0.013471	0.26641	0.018436
GO_mf:go_adenylate_cyclase_activator_activity	5	0.89642	0.014642	0.42998	0.018551
GO_bp:go_establishment_of_planar_polarity_of_embryonic_epithelium	17	0.43356	0.013054	0.20809	0.018607
GO_bp:go_ubiquitin_dependent_erad_pathway	68	0.21102	0.01269	0.10137	0.01869
GO_bp:go_positive_regulation_of_maintenance_of_sister_chromatid_cohesion	5	0.93822	0.015325	0.45112	0.018781
GO_bp:go_regulation_of_high_voltage_gated_calcium_channel_activity	16	0.49762	0.014536	0.23933	0.018806
GO_bp:go_middle_ear_morphogenesis	19	0.45936	0.014621	0.22096	0.018819
GO_bp:go_negative_regulation_of_neuron_migration	10	0.65884	0.015217	0.31705	0.018861
GO_bp:go_regulation_of_maintenance_of_sister_chromatid_cohesion	6	0.85969	0.015382	0.41399	0.018927
GO_bp:go_positive_regulation_of_dna_templated_transcription_elongation	29	0.34777	0.013672	0.16754	0.018964
GO_bp:go_regulation_of_relaxation_of_cardiac_muscle	6	0.90122	0.016125	0.43485	0.019117
GO_bp:go_negative_regulation_of_muscle_cell_differentiation	48	0.27693	0.013999	0.13383	0.019266
GO_bp:go_positive_regulation_of_neurotransmitter_secretion	22	0.38318	0.013123	0.18568	0.019531
GO_bp:go_endocardial_cushion_development	42	0.32828	0.015526	0.1591	0.019547
GO_mf:go_amp_binding	11	0.53643	0.012994	0.26	0.019552
GO_mf:go_protein_methyltransferase_activity	84	0.1918	0.012814	0.092966	0.019558
GO_bp:go_transcription_preinitiation_complex_assembly	40	0.26705	0.012326	0.12951	0.019616
GO_bp:go_mitochondrial_respiratory_chain_complex_assembly	88	0.1808	0.012362	0.087722	0.019654
GO_bp:go_positive_regulation_of_protein_polyubiquitination	11	0.52263	0.01266	0.25359	0.019664
GO_bp:go_positive_regulation_of_cardiac_muscle_tissue_development	44	0.2771	0.013413	0.13448	0.019685
GO_bp:go_regulation_of_muscle_organ_development	131	0.16409	0.013673	0.079659	0.019713
GO_bp:go_negative_regulation_of_protein_localization_to_cell_surface	12	0.66858	0.016915	0.32522	0.019911
GO_bp:go_segmentation	99	0.20147	0.014607	0.098218	0.020126
GO_bp:go_blood_coagulation_intrinsic_pathway	16	0.49136	0.014353	0.23968	0.020186
GO_mf:go_sphingosine_1_phosphate_receptor_activity	8	0.6068	0.012536	0.29628	0.020284
GO_bp:go_rostrocaudal_neural_tube_patterning	10	0.64881	0.014986	0.31714	0.020397
GO_mf:go_protein_kinase_activity	563	0.078987	0.013485	0.038644	0.020487
GO_bp:go_negative_regulation_of_epithelial_cell_proliferation	111	0.17408	0.01336	0.085227	0.020556
GO_mf:go_calcium_channel_inhibitor_activity	11	0.49955	0.012101	0.24468	0.020601
GO_bp:go_covalent_chromatin_modification	421	0.086147	0.012768	0.042225	0.020675
GO_bp:go_3_phosphoadenosine_5_phosphosulfate_metabolic_process	16	0.47213	0.013791	0.23153	0.020722
GO_bp:go_cardiac_atrium_development	33	0.34977	0.014667	0.17156	0.020744
GO_bp:go_regulation_of_cardiocyte_differentiation	47	0.26462	0.013237	0.12985	0.02079
GO_bp:go_vascular_associated_smooth_muscle_cell_migration	21	0.43847	0.014672	0.21523	0.020823
GO_bp:go_multicellular_organismal_movement	51	0.25443	0.013257	0.1256	0.021401
GO_bp:go_cellular_response_to_salt_stress	9	0.64783	0.014195	0.32011	0.021503
GO_bp:go_ureter_development	16	0.503	0.014693	0.2487	0.021569
GO_bp:go_chromatin_organization	689	0.06878	0.012945	0.034031	0.021643
GO_bp:go_cellular_response_to_dna_damage_stimulus	791	0.06331	0.012731	0.031338	0.021687
GO_mf:go_coenzyme_transmembrane_transporter_activity	6	0.62676	0.011215	0.31081	0.021878
GO_bp:go_cell_cycle_g1_s_phase_transition	243	0.11123	0.012585	0.055257	0.022068
GO_bp:go_nerve_growth_factor_signaling_pathway	12	0.55984	0.014164	0.27846	0.022199
GO_bp:go_positive_regulation_of_rna_biosynthetic_process	1512	0.047758	0.013008	0.023801	0.022406
GO_bp:go_maintenance_of_cell_polarity	16	0.52762	0.015412	0.26295	0.022408
GO_bp:go_regulation_of_vasculature_development	303	0.10782	0.013601	0.053741	0.022419
GO_mf:go_cyclic_nucleotide_dependent_protein_kinase_activity	8	0.62974	0.01301	0.3139	0.022426
GO_mf:go_ion_channel_regulator_activity	110	0.17334	0.013243	0.086409	0.022436
GO_bp:go_negative_regulation_of_cardiocyte_differentiation	19	0.41321	0.013152	0.20614	0.022513
GO_bp:go_cytochrome_complex_assembly	33	0.28635	0.012007	0.14297	0.0226
GO_bp:go_ascending_aorta_development	5	1.0118	0.016527	0.50528	0.022626
GO_bp:go_neuron_projection_extension_involved_in_neuron_projection_guidance	35	0.30259	0.013066	0.15115	0.022658
GO_bp:go_tube_development	959	0.062019	0.013668	0.031002	0.022732
GO_bp:go_positive_regulation_of_neurotransmitter_transport	37	0.28774	0.012775	0.14391	0.022786
GO_bp:go_positive_regulation_of_developmental_growth	157	0.14906	0.013588	0.074556	0.022798
GO_bp:go_atrial_cardiac_muscle_tissue_development	6	0.79714	0.014263	0.39893	0.022855
GO_bp:go_somatotropin_secreting_cell_differentiation	5	0.74189	0.012118	0.37151	0.022922
GO_bp:go_muscular_septum_morphogenesis	5	0.93386	0.015254	0.46772	0.022942
GO_bp:go_protein_acetylation	178	0.12991	0.012602	0.065073	0.022958
GO_bp:go_ganglion_development	14	0.52533	0.014355	0.26335	0.023042
GO_bp:go_positive_regulation_of_chromosome_segregation	28	0.35123	0.013568	0.17637	0.023227
GO_bp:go_neural_tube_formation	101	0.18114	0.013264	0.090987	0.023258
GO_mf:go_2_acylglycerol_o_acyltransferase_activity	5	0.80545	0.013156	0.40459	0.023262
GO_bp:go_embryo_development_ending_in_birth_or_egg_hatching	597	0.077568	0.013624	0.038973	0.023288
GO_cc:go_platelet_alpha_granule_membrane	16	0.47543	0.013888	0.23903	0.023358
GO_bp:go_negative_regulation_of_striated_muscle_cell_apoptotic_process	22	0.35727	0.012236	0.17966	0.02338
GO_bp:go_dendrite_extension	32	0.36148	0.014927	0.18183	0.023411
GO_bp:go_negative_regulation_of_atpase_activity	16	0.43394	0.012676	0.21839	0.023468
GO_bp:go_vascular_smooth_muscle_cell_development	9	0.6205	0.013597	0.31228	0.023469
GO_bp:go_autonomic_nervous_system_development	44	0.29791	0.01442	0.14997	0.023498
GO_bp:go_commissural_neuron_axon_guidance	12	0.62436	0.015796	0.31433	0.023507
GO_bp:go_aorta_development	52	0.27352	0.01439	0.13775	0.023546
GO_bp:go_enteroendocrine_cell_differentiation	27	0.35378	0.013421	0.17863	0.023828
GO_bp:go_outflow_tract_morphogenesis	74	0.2291	0.01437	0.11573	0.023878
GO_bp:go_regulation_of_cardiac_muscle_tissue_development	76	0.20642	0.01312	0.10429	0.023902
GO_bp:go_negative_regulation_of_vascular_associated_smooth_muscle_cell_migration	6	0.86188	0.015421	0.43638	0.024137
GO_bp:go_skeletal_muscle_contraction	39	0.27921	0.012726	0.14181	0.024487
GO_bp:go_regulation_of_ruffle_assembly	28	0.34024	0.013144	0.1729	0.024551
GO_mf:go_carbon_sulfur_lyase_activity	10	0.58489	0.013509	0.29727	0.024568
GO_bp:go_epithelial_cell_proliferation_involved_in_lung_morphogenesis	9	0.70375	0.015421	0.35769	0.024572
GO_bp:go_cellular_component_morphogenesis	1060	0.057138	0.013201	0.029084	0.024741
GO_bp:go_cell_maturation	170	0.14011	0.013286	0.071334	0.024764
GO_bp:go_positive_regulation_of_mitotic_sister_chromatid_segregation	17	0.43203	0.013008	0.22002	0.024795
GO_bp:go_rna_capping	33	0.25108	0.010528	0.12801	0.024923
GO_bp:go_regulation_of_type_b_pancreatic_cell_development	8	0.62211	0.012853	0.31732	0.024976
GO_bp:go_mda_5_signaling_pathway	9	0.50608	0.011089	0.25832	0.025055
GO_cc:go_microtubule_cytoskeleton	1112	0.052689	0.01245	0.02696	0.02534
GO_bp:go_protein_localization_to_ciliary_transition_zone	6	0.56658	0.010138	0.28997	0.025364
GO_bp:go_midbrain_dopaminergic_neuron_differentiation	16	0.4692	0.013706	0.24022	0.025406
GO_bp:go_nucleoside_diphosphate_biosynthetic_process	8	0.6458	0.013342	0.33091	0.025502
GO_mf:go_protein_geranylgeranyltransferase_activity	4	0.94196	0.013762	0.48342	0.025685
GO_bp:go_regulation_of_dna_templated_transcription_initiation	35	0.27419	0.01184	0.14073	0.025695
GO_bp:go_cellular_sodium_ion_homeostasis	16	0.513	0.014985	0.2636	0.025827
GO_bp:go_peptidyl_lysine_acetylation	150	0.13759	0.012262	0.070725	0.025875
GO_bp:go_signal_release	437	0.085412	0.012892	0.04393	0.025939
GO_bp:go_negative_regulation_of_mrna_splicing_via_spliceosome	18	0.34817	0.010787	0.1791	0.025957
GO_bp:go_nucleobase_containing_small_molecule_biosynthetic_process	94	0.17518	0.012378	0.090142	0.025993
GO_bp:go_dendrite_morphogenesis	124	0.16851	0.013664	0.086726	0.026014
GO_bp:go_activation_of_mapkk_activity	51	0.25673	0.013376	0.13232	0.02619
GO_bp:go_epithelial_tube_morphogenesis	301	0.10733	0.013495	0.055342	0.02623
GO_bp:go_vesicle_transport_along_actin_filament	5	0.68475	0.011185	0.35321	0.02628
GO_bp:go_myoblast_differentiation	83	0.19314	0.012827	0.099876	0.026576
GO_mf:go_general_transcription_initiation_factor_binding	40	0.23848	0.011008	0.12346	0.026709
GO_bp:go_negative_regulation_of_cardiac_muscle_adaptation	6	0.84162	0.015059	0.43581	0.026739
GO_bp:go_cell_substrate_junction_assembly	93	0.18862	0.013256	0.097698	0.026775
GO_bp:go_ureter_morphogenesis	7	0.70337	0.013593	0.36436	0.026783
GO_bp:go_epithelial_cell_proliferation	352	0.093929	0.012753	0.04867	0.026817
GO_mf:go_telomerase_rna_binding	21	0.41932	0.014031	0.21732	0.026845
GO_bp:go_histone_h3_k27_demethylation	2	1.7766	0.018355	0.92088	0.026857
GO_mf:go_histone_demethylase_activity_h3_k27_specific_	2	1.7766	0.018355	0.92088	0.026857
GO_bp:go_positive_regulation_of_mesonephros_development	19	0.44504	0.014166	0.23074	0.026887
GO_cc:go_cortical_endoplasmic_reticulum	5	0.92209	0.015062	0.47903	0.027129
GO_bp:go_positive_regulation_of_growth	235	0.11493	0.012791	0.059746	0.02721
GO_bp:go_regulation_of_epithelial_cell_proliferation_involved_in_lung_morphogenesis	7	0.77099	0.0149	0.40102	0.027275
GO_cc:go_mhc_class_i_peptide_loading_complex	6	0.58803	0.010522	0.30592	0.027301
GO_bp:go_negative_regulation_of_axon_guidance	26	0.32858	0.012232	0.17108	0.027398
GO_bp:go_acylglycerol_acyl_chain_remodeling	5	0.7438	0.01215	0.3878	0.027562
GO_mf:go_n_methyltransferase_activity	91	0.17022	0.011834	0.088795	0.027629
GO_bp:go_dorsal_ventral_pattern_formation	87	0.2008	0.013652	0.10491	0.027812
GO_bp:go_positive_regulation_of_transcription_by_rna_polymerase_ii	1120	0.052702	0.012495	0.027552	0.027895
GO_bp:go_neural_crest_cell_migration	55	0.24613	0.013316	0.12883	0.028045
GO_cc:go_insulin_receptor_complex	5	0.91778	0.014991	0.48051	0.028074
GO_bp:go_regulation_of_vascular_smooth_muscle_contraction	8	0.70937	0.014655	0.37156	0.02813
GO_bp:go_muscle_fiber_development	66	0.21468	0.012719	0.11267	0.028373
GO_bp:go_regulation_of_peptide_hormone_secretion	196	0.1248	0.012698	0.065567	0.028504
GO_mf:go_bioactive_lipid_receptor_activity	12	0.47079	0.011911	0.24739	0.028525
GO_bp:go_ventricular_septum_morphogenesis	41	0.30118	0.014074	0.15829	0.028547
GO_bp:go_protein_acylation	220	0.11058	0.011912	0.058326	0.028994
GO_bp:go_regulation_of_meiotic_cell_cycle	47	0.23374	0.011693	0.12331	0.029012
GO_bp:go_glycosyl_compound_metabolic_process	57	0.23385	0.012879	0.1235	0.029149
GO_bp:go_heterochromatin_organization	18	0.4078	0.012634	0.21563	0.029307
GO_cc:go_cuticular_plate	9	0.56769	0.012439	0.30019	0.029313
GO_cc:go_nuclear_cyclin_dependent_protein_kinase_holoenzyme_complex	12	0.48106	0.012171	0.25476	0.029501
GO_bp:go_regulation_of_erad_pathway	27	0.31508	0.011953	0.16688	0.02952
GO_bp:go_developmental_induction	31	0.31596	0.012842	0.16776	0.029831
GO_bp:go_cellular_carbohydrate_metabolic_process	245	0.10658	0.012108	0.056659	0.02999
GO_bp:go_facial_nerve_morphogenesis	10	0.583	0.013466	0.30995	0.029997
GO_bp:go_regulation_of_smooth_muscle_cell_differentiation	30	0.30584	0.012229	0.16263	0.030023
GO_bp:go_positive_regulation_of_histone_h3_k27_methylation	5	0.63259	0.010333	0.33662	0.030114
GO_bp:go_negative_regulation_of_calcium_ion_dependent_exocytosis	11	0.50666	0.012273	0.27014	0.030367
GO_bp:go_protein_transport_into_membrane_raft	4	0.84816	0.012392	0.45234	0.030402
GO_bp:go_phosphatidylcholine_catabolic_process	8	0.55035	0.01137	0.29359	0.030434
GO_bp:go_cranial_nerve_morphogenesis	27	0.36609	0.013888	0.19533	0.030457
GO_bp:go_regulation_of_transcription_initiation_from_rna_polymerase_ii_promoter	26	0.29574	0.011009	0.15786	0.030513
GO_bp:go_protein_dna_complex_subunit_organization	234	0.10342	0.011485	0.055295	0.030733
GO_bp:go_negative_regulation_of_synaptic_vesicle_transport	5	0.75063	0.012261	0.4022	0.031009
GO_bp:go_neural_crest_cell_differentiation	87	0.19402	0.013191	0.10398	0.031037
GO_bp:go_ketone_biosynthetic_process	41	0.24235	0.011325	0.12995	0.031099
GO_bp:go_negative_regulation_of_voltage_gated_calcium_channel_activity	13	0.47174	0.012422	0.2531	0.031178
GO_mf:go_histone_methyltransferase_activity_h4_k20_specific_	5	0.68737	0.011228	0.3688	0.031185
GO_mf:go_organic_acid_sodium_symporter_activity	27	0.34298	0.013011	0.18431	0.031386
GO_bp:go_regulation_of_glucocorticoid_metabolic_process	9	0.4968	0.010886	0.26703	0.031421
GO_bp:go_regulation_of_atpase_activity	73	0.1768	0.011014	0.095187	0.031638
GO_mf:go_s_adenosylmethionine_dependent_methyltransferase_activity	149	0.12951	0.011504	0.069795	0.031763
GO_mf:go_oligopeptide_transmembrane_transporter_activity	7	0.63615	0.012294	0.34288	0.031784
GO_bp:go_intermediate_filament_bundle_assembly	6	0.69491	0.012434	0.37481	0.031874
GO_bp:go_plasminogen_activation	22	0.37654	0.012896	0.20313	0.031901
GO_bp:go_neuron_projection_arborization	18	0.39094	0.012112	0.21093	0.031917
GO_bp:go_regulation_of_ventricular_cardiac_muscle_cell_action_potential	15	0.49458	0.013989	0.26688	0.031937
GO_bp:go_regulation_of_ryanodine_sensitive_calcium_release_channel_activity	24	0.35317	0.012632	0.1908	0.032091
GO_bp:go_dendritic_spine_development	81	0.19376	0.012713	0.10479	0.032241
GO_bp:go_branching_morphogenesis_of_an_epithelial_tube	143	0.15008	0.013061	0.081262	0.032396
GO_bp:go_regulation_of_striated_muscle_cell_differentiation	95	0.16813	0.011942	0.091046	0.032405
GO_mf:go_protein_serine_threonine_kinase_inhibitor_activity	32	0.3104	0.012817	0.16822	0.032511
GO_bp:go_epithelial_cilium_movement	22	0.31453	0.010772	0.1705	0.032545
GO_bp:go_membrane_repolarization	41	0.29285	0.013685	0.15892	0.032696
GO_bp:go_regulation_of_system_process	550	0.075092	0.012676	0.04079	0.032823
GO_bp:go_actin_filament_based_movement	130	0.15611	0.012959	0.084838	0.032887
GO_bp:go_positive_regulation_of_myoblast_differentiation	22	0.37753	0.012929	0.20518	0.032891
GO_mf:go_atp_dependent_dna_helicase_activity	36	0.23463	0.010275	0.1276	0.03298
GO_bp:go_nucleoside_phosphate_metabolic_process	204	0.11399	0.01183	0.062003	0.033001
GO_bp:go_pattern_specification_process	417	0.089624	0.013221	0.04878	0.033093
GO_bp:go_tube_closure	87	0.1792	0.012183	0.097561	0.033129
GO_mf:go_protein_serine_threonine_kinase_activity	413	0.080889	0.011877	0.04404	0.033134
GO_bp:go_dna_geometric_change	86	0.16311	0.011026	0.08884	0.033189
GO_cc:go_sarcoplasm	77	0.17995	0.011513	0.098084	0.033285
GO_bp:go_cell_cycle_phase_transition	558	0.067822	0.011529	0.037012	0.033452
GO_mf:go_oxidoreductase_activity_acting_on_diphenols_and_related_substances_as_donors	9	0.48676	0.010666	0.26604	0.033661
GO_bp:go_adherens_junction_assembly	86	0.1842	0.012452	0.10089	0.033943
GO_bp:go_prostate_gland_morphogenesis	27	0.36806	0.013962	0.20163	0.033976
GO_cc:go_costamere	17	0.40958	0.012332	0.22442	0.034007
GO_bp:go_negative_regulation_of_cellular_response_to_insulin_stimulus	33	0.29017	0.012168	0.15917	0.034156
GO_bp:go_regulation_of_wound_healing	125	0.15194	0.01237	0.083553	0.034502
GO_bp:go_cellular_response_to_retinoic_acid	71	0.21319	0.013099	0.11732	0.034599
GO_bp:go_somatic_motor_neuron_differentiation	5	0.72008	0.011762	0.39645	0.03467
GO_mf:go_peptide_antigen_binding	21	0.36019	0.012052	0.19841	0.034737
GO_bp:go_peptidyl_amino_acid_modification	1150	0.049598	0.011905	0.027324	0.034759
GO_bp:go_positive_regulation_of_interleukin_5_secretion	5	0.59425	0.0097067	0.32751	0.03481
GO_bp:go_negative_regulation_of_glial_cell_proliferation	15	0.45655	0.012913	0.25213	0.035097
GO_bp:go_heart_valve_development	55	0.24499	0.013255	0.13534	0.035143
GO_bp:go_protein_localization_to_cytoplasmic_stress_granule	6	0.99623	0.017825	0.55053	0.03519
GO_bp:go_interkinetic_nuclear_migration	5	0.96339	0.015736	0.53295	0.03534
GO_bp:go_fibrinolysis	27	0.29106	0.011041	0.16105	0.035368
GO_bp:go_anoikis	33	0.28832	0.01209	0.15979	0.035596
GO_bp:go_photoreceptor_cell_maintenance	36	0.28406	0.01244	0.1576	0.035753
GO_bp:go_response_to_muscle_stretch	18	0.4114	0.012746	0.22858	0.035956
GO_mf:go_protein_tyrosine_serine_threonine_phosphatase_activity	41	0.24331	0.01137	0.13537	0.03615
GO_mf:go_alpha_tubulin_binding	28	0.34287	0.013245	0.19084	0.036205
GO_bp:go_uterine_smooth_muscle_contraction	11	0.53679	0.013003	0.29882	0.036229
GO_bp:go_pericyte_cell_differentiation	7	0.6462	0.012488	0.35978	0.036251
GO_bp:go_cranial_nerve_development	48	0.25769	0.013027	0.14349	0.036265
GO_bp:go_actin_filament_based_transport	8	0.48797	0.010081	0.27188	0.036352
GO_bp:go_dna_endoreduplication	8	0.54413	0.011242	0.30331	0.036417
GO_bp:go_energy_reserve_metabolic_process	79	0.18705	0.012121	0.10429	0.036452
GO_bp:go_histone_h3_acetylation	55	0.2024	0.01095	0.11289	0.036511
GO_bp:go_negative_regulation_of_synapse_assembly	7	0.61354	0.011857	0.34261	0.036674
GO_cc:go_dendritic_growth_cone	8	0.58131	0.01201	0.3247	0.03671
GO_cc:go_lewy_body	8	0.5046	0.010425	0.28198	0.036776
GO_bp:go_regulation_of_dendrite_extension	23	0.36675	0.012842	0.205	0.036812
GO_mf:go_polyubiquitin_modification_dependent_protein_binding	46	0.20097	0.0099461	0.11241	0.036906
GO_bp:go_cardiac_muscle_fiber_development	18	0.38571	0.01195	0.21577	0.03693
GO_cc:go_transcription_factor_tfiid_complex	33	0.26945	0.011299	0.15075	0.036947
GO_bp:go_regulation_of_muscle_hypertrophy	57	0.2262	0.012458	0.12668	0.037083
GO_cc:go_nucleotide_activated_protein_kinase_complex	13	0.40563	0.010681	0.22719	0.037105
GO_mf:go_3_keto_sterol_reductase_activity	5	0.61015	0.0099664	0.34176	0.037115
GO_cc:go_late_endosome_membrane	119	0.14015	0.011135	0.07853	0.037162
GO_bp:go_ruffle_assembly	41	0.23978	0.011205	0.13471	0.037552
GO_bp:go_glandular_epithelial_cell_development	25	0.3281	0.011977	0.18448	0.037669
GO_mf:go_dna_helicase_activity	47	0.2035	0.01018	0.11453	0.037809
GO_bp:go_regulation_of_animal_organ_formation	36	0.28137	0.012322	0.15843	0.037879
GO_bp:go_motor_neuron_axon_guidance	22	0.34548	0.011832	0.19511	0.038312
GO_bp:go_negative_regulation_of_muscle_hypertrophy	26	0.32188	0.011983	0.18209	0.038566
GO_bp:go_regulation_of_centriole_elongation	5	0.78298	0.012789	0.44307	0.038609
GO_bp:go_heart_process	265	0.10383	0.012261	0.05881	0.038743
GO_bp:go_organophosphate_catabolic_process	121	0.13695	0.010971	0.077741	0.039071
GO_bp:go_purine_deoxyribonucleotide_catabolic_process	6	0.60015	0.010738	0.34083	0.039143
GO_bp:go_positive_regulation_of_epithelial_cell_proliferation_involved_in_lung_morphogenesis	5	0.8275	0.013517	0.47014	0.039205
GO_cc:go_signal_recognition_particle_receptor_complex	6	0.66553	0.011908	0.37904	0.039565
GO_bp:go_regulation_of_actin_filament_based_movement	40	0.27282	0.012593	0.15544	0.039626
GO_bp:go_positive_regulation_of_oxidoreductase_activity	52	0.2221	0.011685	0.12697	0.040134
GO_mf:go_transmembrane_receptor_protein_tyrosine_kinase_adaptor_activity	12	0.45542	0.011522	0.26067	0.040318
GO_bp:go_mesenchymal_cell_proliferation	44	0.26571	0.012862	0.15228	0.040516
GO_mf:go_prenyltransferase_activity	14	0.39151	0.010699	0.22443	0.040546
GO_bp:go_dichotomous_subdivision_of_an_epithelial_terminal_unit	11	0.57047	0.013819	0.32703	0.040555
GO_cc:go_chromosome	972	0.04932	0.010939	0.028297	0.04068
GO_mf:go_nuclear_export_signal_receptor_activity	9	0.60853	0.013334	0.34917	0.040696
GO_bp:go_metanephric_tubule_morphogenesis	11	0.48495	0.011747	0.27827	0.040702
GO_bp:go_muscle_filament_sliding	37	0.2665	0.011832	0.15297	0.040743
GO_bp:go_cell_fate_specification	79	0.18915	0.012257	0.10858	0.040763
GO_bp:go_intracellular_distribution_of_mitochondria	8	0.53709	0.011096	0.30847	0.040838
GO_bp:go_response_to_misfolded_protein	23	0.28166	0.0098628	0.16192	0.040979
GO_cc:go_ikappab_kinase_complex	7	0.50295	0.0097199	0.28916	0.040996
GO_bp:go_dendrite_self_avoidance	16	0.4605	0.013452	0.26511	0.041199
GO_bp:go_negative_regulation_of_transporter_activity	73	0.1941	0.012093	0.11178	0.041247
GO_mf:go_nadplus_kinase_activity	16	0.34781	0.01016	0.20064	0.041514
GO_bp:go_neural_crest_formation	12	0.48568	0.012288	0.28024	0.04155
GO_mf:go_nucleosome_binding	72	0.17236	0.010665	0.099494	0.041611
GO_bp:go_coenzyme_transport	8	0.4951	0.010229	0.28604	0.041743
GO_bp:go_cellular_response_to_mineralocorticoid_stimulus	5	0.74071	0.012099	0.42799	0.041763
GO_bp:go_organic_acid_transmembrane_transport	124	0.14372	0.011653	0.08306	0.041797
GO_bp:go_negative_regulation_of_erythrocyte_differentiation	10	0.45495	0.010508	0.26314	0.041918
GO_bp:go_gastric_motility	6	0.59539	0.010653	0.34451	0.04198
GO_bp:go_regulation_of_vascular_permeability	30	0.29985	0.011989	0.1737	0.042161
GO_bp:go_regulation_of_epithelial_cell_differentiation	134	0.14023	0.011817	0.081269	0.042232
GO_bp:go_mesonephric_tubule_morphogenesis	61	0.21762	0.012397	0.12613	0.042237
GO_bp:go_purine_nucleoside_triphosphate_catabolic_process	6	0.58126	0.0104	0.33713	0.04235
GO_cc:go_chaperone_complex	21	0.26433	0.0088447	0.15345	0.042496
GO_bp:go_myoblast_fate_commitment	5	0.81099	0.013247	0.47083	0.0425
GO_bp:go_regulation_of_nucleotide_metabolic_process	7	0.65272	0.012614	0.37895	0.042505
GO_bp:go_cell_communication_by_electrical_coupling_involved_in_cardiac_conduction	24	0.34281	0.012262	0.19913	0.042587
GO_bp:go_regulation_of_myeloid_leukocyte_differentiation	113	0.15109	0.011699	0.087876	0.042782
GO_bp:go_negative_regulation_of_intracellular_transport	58	0.2047	0.011372	0.11906	0.042786
GO_bp:go_stress_induced_premature_senescence	8	0.45909	0.0094846	0.26734	0.042978
GO_bp:go_aggresome_assembly	5	0.68999	0.011271	0.40214	0.043109
GO_bp:go_morphogenesis_of_an_epithelium	506	0.071184	0.011539	0.041524	0.043249
GO_bp:go_positive_regulation_of_plasma_membrane_bounded_cell_projection_assembly	93	0.15486	0.010883	0.090492	0.043524
GO_bp:go_positive_regulation_of_interferon_beta_production	28	0.24974	0.0096476	0.146	0.043594
GO_bp:go_positive_regulation_of_meiotic_nuclear_division	13	0.47653	0.012548	0.27935	0.044026
GO_mf:go_sodium_channel_inhibitor_activity	7	0.62645	0.012107	0.36725	0.044034
GO_bp:go_positive_regulation_of_epithelial_cell_differentiation_involved_in_kidney_development	7	0.69155	0.013365	0.40556	0.044089
GO_bp:go_regulation_of_vascular_smooth_muscle_cell_proliferation	49	0.22759	0.011624	0.13353	0.04416
GO_bp:go_negative_regulation_of_synapse_organization	22	0.3435	0.011764	0.20173	0.044315
GO_bp:go_mitotic_cytokinesis	68	0.18034	0.010845	0.10601	0.044464
GO_mf:go_coreceptor_activity_involved_in_wnt_signaling_pathway	8	0.5819	0.012022	0.34257	0.044701
GO_bp:go_type_b_pancreatic_cell_development	20	0.34213	0.011172	0.20148	0.044753
GO_bp:go_pyrimidine_ribonucleotide_biosynthetic_process	18	0.33386	0.010343	0.19665	0.044787
GO_bp:go_regulation_of_sarcomere_organization	7	0.68178	0.013176	0.40217	0.045023
GO_bp:go_positive_regulation_of_chemokine_biosynthetic_process	10	0.53184	0.012284	0.31387	0.045096
GO_mf:go_protein_n_terminus_binding	103	0.15111	0.011173	0.089187	0.045115
GO_bp:go_protein_autophosphorylation	224	0.1053	0.011445	0.062158	0.045135
GO_bp:go_positive_regulation_of_reproductive_process	72	0.18675	0.011555	0.11025	0.045158
GO_bp:go_negative_regulation_of_dna_templated_transcription_initiation	6	0.62061	0.011104	0.36688	0.045374
GO_cc:go_chromatin_silencing_complex	6	0.54995	0.0098401	0.32515	0.045395
GO_bp:go_regulation_of_bone_remodeling	44	0.24946	0.012075	0.1475	0.045396
GO_mf:go_activating_transcription_factor_binding	71	0.19319	0.01187	0.11424	0.045423
GO_bp:go_retinal_blood_vessel_morphogenesis	6	0.73871	0.013218	0.43709	0.045519
GO_bp:go_ventricular_cardiac_muscle_cell_action_potential	32	0.31387	0.012961	0.1858	0.045588
GO_bp:go_cardiac_muscle_cell_cardiac_muscle_cell_adhesion	7	0.67375	0.013021	0.39898	0.045648
GO_bp:go_enteric_nervous_system_development	13	0.4598	0.012108	0.27233	0.045676
GO_cc:go_ribbon_synapse	9	0.53021	0.011618	0.31439	0.045863
GO_bp:go_regulation_of_heart_rate_by_cardiac_conduction	36	0.29757	0.013032	0.1767	0.046096
GO_mf:go_axon_guidance_receptor_activity	8	0.57517	0.011883	0.34172	0.046183
GO_bp:go_organ_growth	168	0.11961	0.011275	0.071163	0.046416
GO_bp:go_positive_regulation_of_b_cell_receptor_signaling_pathway	8	0.50193	0.01037	0.29877	0.046488
GO_bp:go_regulation_of_glycogen_metabolic_process	33	0.23855	0.010003	0.14228	0.046812
GO_bp:go_regulation_of_myoblast_fusion	21	0.33248	0.011125	0.19838	0.046883
GO_bp:go_immature_t_cell_proliferation	8	0.50055	0.010341	0.29912	0.047134
GO_bp:go_ncrna_transcription	103	0.13056	0.0096542	0.078029	0.047145
GO_bp:go_dopaminergic_neuron_axon_guidance	5	0.85241	0.013924	0.50945	0.047155
GO_bp:go_positive_regulation_of_transcription_by_rna_polymerase_i	20	0.31749	0.010368	0.18977	0.04717
GO_bp:go_kynurenine_metabolic_process	5	0.7948	0.012983	0.47531	0.047252
GO_bp:go_cardiac_septum_development	105	0.15708	0.011726	0.094029	0.047416
GO_bp:go_macrophage_colony_stimulating_factor_production	5	0.61297	0.010012	0.36722	0.047549
GO_cc:go_smc5_smc6_complex	7	0.64448	0.012455	0.38637	0.047665
GO_bp:go_response_to_nerve_growth_factor	52	0.21947	0.011546	0.13161	0.047704
GO_mf:go_sequence_specific_dna_binding	1051	0.048713	0.011209	0.029227	0.047795
GO_mf:go_steroid_hormone_binding	6	0.70251	0.01257	0.42157	0.047824
GO_mf:go_nucleoside_triphosphate_diphosphatase_activity	9	0.50345	0.011032	0.30212	0.047826
GO_bp:go_renal_tubule_development	89	0.17383	0.011952	0.1044	0.047959
GO_cc:go_perinuclear_region_of_cytoplasm	660	0.058033	0.010699	0.034887	0.048116
GO_mf:go_retinal_binding	16	0.34378	0.010042	0.2068	0.048229
GO_cc:go_cornified_envelope	59	0.24021	0.013459	0.14459	0.048333
GO_bp:go_response_to_interleukin_12	47	0.20502	0.010256	0.12344	0.048371
GO_bp:go_positive_regulation_of_dna_ligation	5	0.70749	0.011556	0.42633	0.04852
GO_mf:go_mitogen_activated_protein_kinase_kinase_binding	15	0.42394	0.011991	0.25561	0.048612
GO_cc:go_anchoring_junction	530	0.066297	0.010992	0.039985	0.048662
GO_bp:go_striated_muscle_myosin_thick_filament_assembly	11	0.44005	0.01066	0.26547	0.048708
GO_bp:go_regulation_of_histone_h3_k27_methylation	8	0.49854	0.0103	0.3008	0.04873
GO_bp:go_negative_regulation_of_immature_t_cell_proliferation	5	0.59317	0.009689	0.35799	0.048776
GO_bp:go_negative_regulation_of_cytokinesis	7	0.60887	0.011767	0.36782	0.048935
GO_bp:go_glucocorticoid_secretion	10	0.43596	0.010069	0.26352	0.049036
GO_bp:go_purine_containing_compound_transmembrane_transport	8	0.53987	0.011154	0.32644	0.049094
GO_bp:go_regulation_of_protein_polyubiquitination	20	0.30427	0.0099362	0.18419	0.04928
GO_bp:go_protein_targeting_to_vacuole	32	0.26696	0.011024	0.16161	0.049286
GO_bp:go_guanosine_containing_compound_metabolic_process	23	0.31061	0.010876	0.18808	0.049327
GO_bp:go_regulation_of_carbohydrate_metabolic_process_by_regulation_of_transcription_from_rna_polymerase_ii_promoter	10	0.42776	0.0098801	0.25958	0.049695
*A total of 9987 gene ontology (GO) sets were tested from the Molecular Signatures Database (MsigDB) v6.2 . Only those with nominal significance (P<0.05) are shown. The P-value threshold for significance is set to 0.05/9987 = 5.0x10-6. Gene sets passing this Bonferroni-corrected P-value are in shaded grey. Reported statistical results from MAGMA gene set enrichment analysis. P values are not corr…
Abbreviations: BETA, regression coefficient; BETA_STD, semi-standardized regression coefficient, corresponding to the predicted change in Z-value given a change of one standard deviation in the predictor gene set; NGENES, number of genes in the set that are also in the gene-based analysis; SE, standard error.

[truncated: 12 more sheets: ST10, ST11, ST12, ST13, ST14, ST15, ST16, ST17, ST18, ST19, ST20, ST21]
